# Supplementary material for: Food groups and intermediate disease markers: a systematic review and network meta-analysis of randomized trials
Source: PubMed Central journal article supplement — Am J Clin Nutr. 2018 Sep 11;108(3):576–86. doi: 10.1093/ajcn/nqy151 (PMC6134288; doi:10.1093/ajcn/nqy151), 2018-09-11
Supplement: nqy151_supplemental_material.pdf [file nqy151_supplemental_material.pdf]

**Food groups and metabolic risk factors: a systematic review and network  
meta-analysis of randomized trials**

Lukas Schwingshackl<sup>1,2</sup>, Georg Hoffmann<sup>3</sup>, Khalid Iqbal<sup>1</sup>, Carolina Schwedhelm<sup>1,2</sup>, Heiner Boeing<sup>1,2</sup>

<sup>1</sup> Department of Epidemiology, German Institute of Human Nutrition Potsdam-Rehbruecke (DIfE),  
Arthur-Scheunert-Allee 114-116, 14558 Nuthetal, Germany

<sup>2</sup> NutriAct – Competence Cluster Nutrition Research Berlin-Potsdam

<sup>3</sup> Department of Nutritional Sciences, University of Vienna, Althanstraße 14, 1090 Vienna, Austria

Corresponding author: Lukas Schwingshackl, PhD

Arthur-Scheunert-Allee 114-116; 14558 Nuthetal, Germany

T: +49 (0)33200 88-2723

[lukas.schwingshackl@dife.de](mailto:lukas.schwingshackl@dife.de)

Email: [georg.hoffmann@univie.ac.at](mailto:georg.hoffmann@univie.ac.at)

[khalid.iqbal@dife.de](mailto:khalid.iqbal@dife.de)

[carolina.schwedhelm@dife.de](mailto:carolina.schwedhelm@dife.de)

[boeing@dife.de](mailto:boeing@dife.de)

Online Supporting Material

| <b>Content</b>                                                                                     | <b>Page</b> |
|----------------------------------------------------------------------------------------------------|-------------|
| Supplemental Appendix 1: Search Strategy                                                           | 3           |
| Supplemental Figure 1: Flow diagram                                                                | 4           |
| Supplemental Figure 2: Risk of bias                                                                | 5           |
| Supplemental Table 1: Full-text articles excluded                                                  | 6-7         |
| Supplemental Table 2: Study characteristics                                                        | 8-40        |
| Supplemental Figure 3-7: Box plots                                                                 | 41-45       |
| Supplemental Table 3: Contribution matrix for LDL-C and TG                                         | 46          |
| Supplemental Table 4-11: League table for TC, HDL-C, FG, HbA1c, HOMA-IR, SBP, DBP, CRP             | 47-54       |
| Supplemental Table 12-13: Side-splitting approach for LDL-C and TG                                 | 55-56       |
| Supplemental Figure 8-9: Loop-specific approach for LDL-C and TG                                   | 57-58       |
| Supplemental Table 14-15: Sensitivity analysis excluding high-risk of bias trials for LDL-C and TG | 59-60       |
| Supplemental Figure 10-11: Comparison-adjusted funnel plots for LDL-C and TG                       | 61          |
| Supplemental Table 16-17: GRADE assessment for LDL-C and TG                                        | 62-71       |
| Supplemental References                                                                            | 72-94       |

Supplemental Appendix 1: Full search strategy

**PubMed:**

(food\*[tiab] OR whole grain\*[tiab] OR refined grain\*[tiab] OR cereal\*[tiab] OR pasta\*[tiab] OR rice\*[tiab] OR potato\*[tiab] OR vegetable\*[tiab] OR fruit\*[tiab] OR nut\*[tiab] OR legume\*[tiab] OR bean\*[tiab] OR egg\*[tiab] OR dairy[tiab] OR dairies[tiab] OR milk[tiab] OR yogurt[tiab] OR cheese[tiab] OR fish[tiab] OR seafood[tiab] OR meat[tiab] OR processed meat[tiab] OR sugar sweetened beverage\*[tiab])

AND (triglyceride[tiab] OR triacylglycerol[tiab] OR “insulin resistance” [tiab] OR homeostasis model assessment[tiab] OR HOMA[tiab] OR HOMA-IR[tiab] OR quantitative insulin sensitivity check index[tiab] OR QUICKI[tiab] OR Matsuda[tiab] OR glucose tolerance[tiab] OR hyperinsulinemic[tiab] OR hyperinsulinaemic[tiab] OR glucose[tiab] OR glycaemic[tiab] OR glyemic[tiab] OR glycemia[tiab] OR HbA1c[tiab] OR haemoglobin[tiab] OR A1c[tiab] OR diabetes[tiab] OR glycated[tiab] OR glycosylated[tiab] OR hyperinsulinism[tiab] OR cholesterol[tiab] OR lipids[tiab] OR low density lipoprotein[tiab] OR LDL[tiab] OR high density lipoprotein[tiab] OR HDL[tiab] OR lipemia[tiab] OR lipaemia[tiab] OR dyslipidemia[tiab] OR visceral[tiab] OR CRP[tiab] OR C-Reactive Protein[tiab] OR hs-CRP[tiab] OR high sensitivity C-reactive protein[tiab])

AND

(randomized controlled trial[pt] OR controlled clinical trial[pt] OR randomized[tiab] OR placebo [tiab] OR clinical trials as topic [mesh: noexp] OR randomly [tiab] OR trial [ti]) NOT (animals [mh] NOT humans [mh])

Online Supporting Material

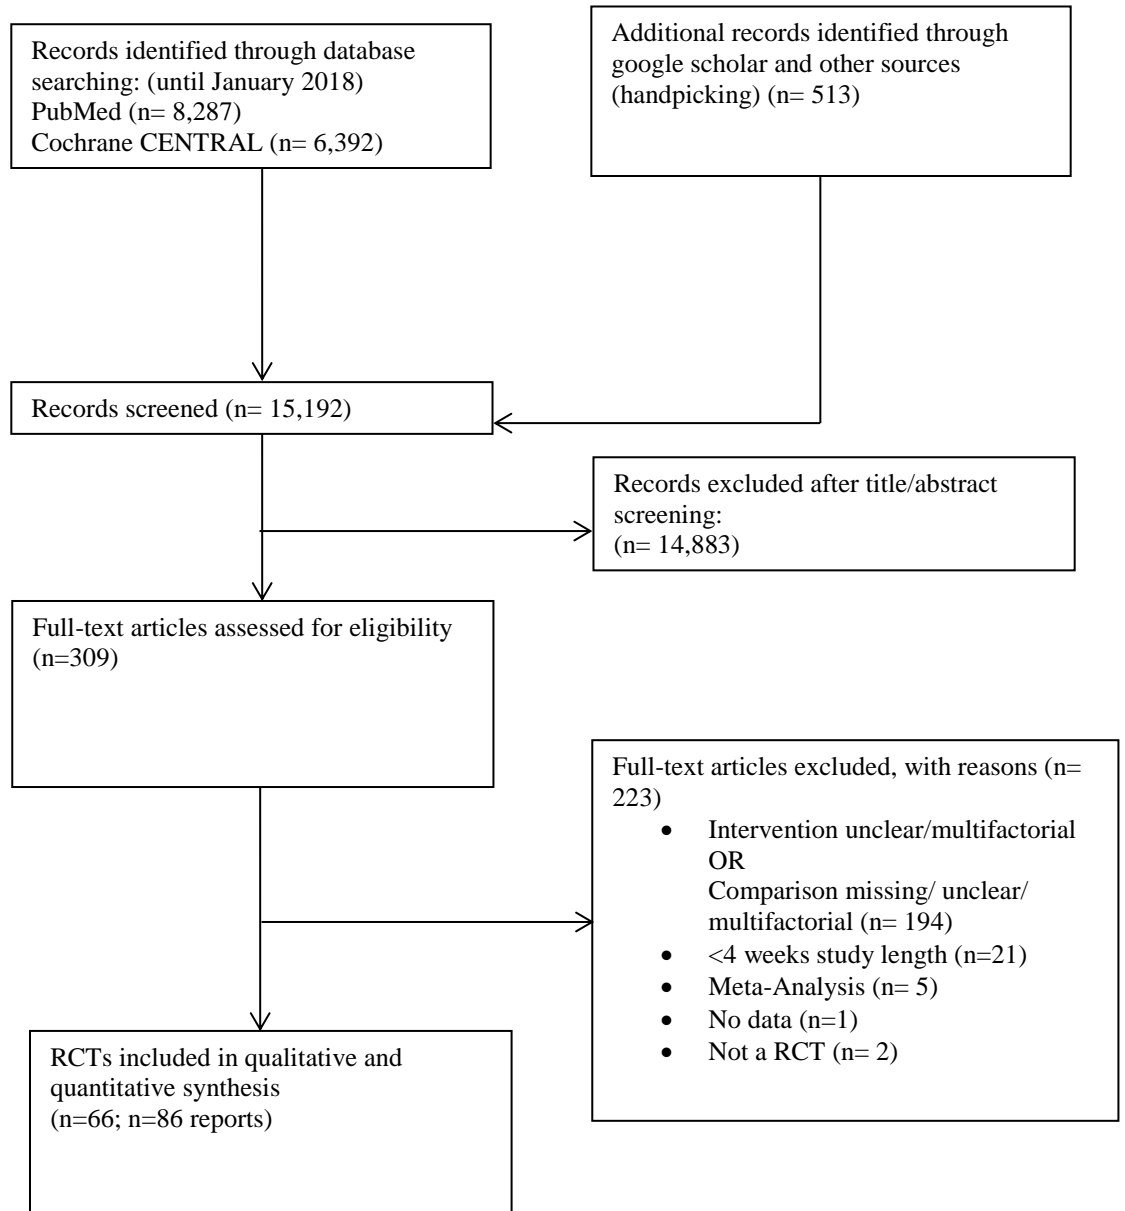

Supplemental Figure 1: Flow diagram for study selection

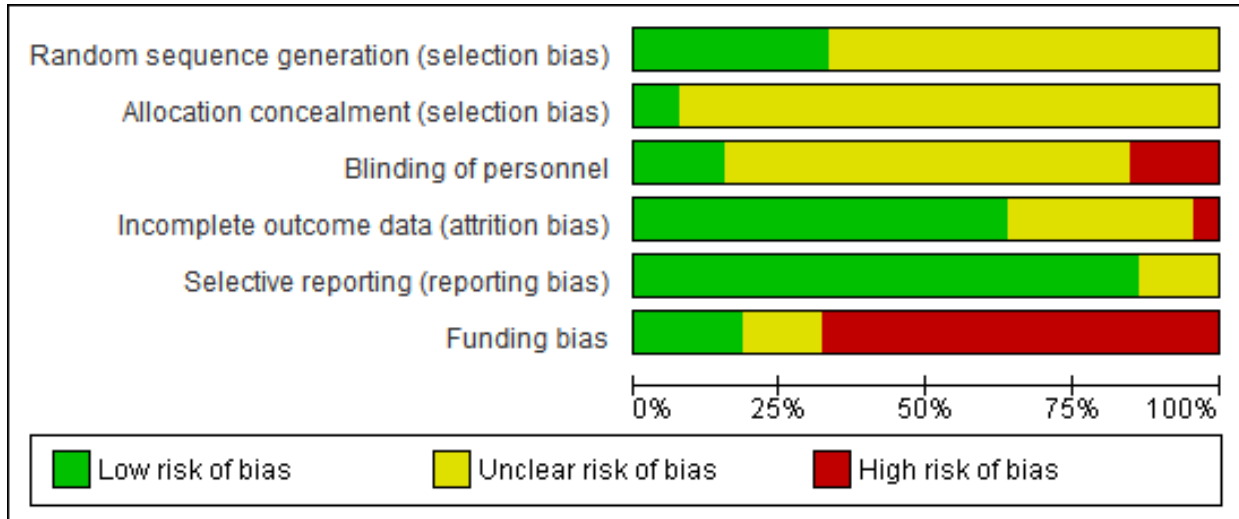

Supplemental Figure 2: Risk of bias graph: judgements about each risk of bias item presented as percentages across all included studies.

Supplemental Table 1: Full-text articles excluded

| Reason for exclusion                                                             | Supplemental References                                                                                                                                                                                                                                                                                                                                                                                                                                                                                                                                                                                                                                                                                                                                                                                                                                                                                                                                                                                                                                                                                                                                                                                                                                                                                                                                                                                                                                                                                                                                                                                                                                                                                                                                                                                                                                                                                                                                                                                                             |
|----------------------------------------------------------------------------------|-------------------------------------------------------------------------------------------------------------------------------------------------------------------------------------------------------------------------------------------------------------------------------------------------------------------------------------------------------------------------------------------------------------------------------------------------------------------------------------------------------------------------------------------------------------------------------------------------------------------------------------------------------------------------------------------------------------------------------------------------------------------------------------------------------------------------------------------------------------------------------------------------------------------------------------------------------------------------------------------------------------------------------------------------------------------------------------------------------------------------------------------------------------------------------------------------------------------------------------------------------------------------------------------------------------------------------------------------------------------------------------------------------------------------------------------------------------------------------------------------------------------------------------------------------------------------------------------------------------------------------------------------------------------------------------------------------------------------------------------------------------------------------------------------------------------------------------------------------------------------------------------------------------------------------------------------------------------------------------------------------------------------------------|
| <4 weeks                                                                         | Anderson 1984 (1), Jenkins 2001 (2), Nestel 1984 (3), Enright 2010 (4), Broekmans 2001 (5), Dragsted 2004 (6), Kim 2015 (7), Anderson 1990 (8), Bodinham 2011 (9), Costabile 2008 (10), De Oliveira e Silva 1996 (11), Weickert 2006 (12), Stephen 1995 (13), Edwards 1999 (14), Giacco 2010 (15), Karlstrom 1984 (16), Kerckhoffs 2003 (17), Kirby 1981 (18), Luhovyy 2014 (19), Ross 2011 (20), Soerensen 2014 (21)                                                                                                                                                                                                                                                                                                                                                                                                                                                                                                                                                                                                                                                                                                                                                                                                                                                                                                                                                                                                                                                                                                                                                                                                                                                                                                                                                                                                                                                                                                                                                                                                               |
| Intervention unclear/multifactorial<br>Comparison missing/unclear/multifactorial | Mackay 1992 (22), Davidson 1991 (23), Vander Wal 2008 (24), van Houwelingen 1990 (25), Whyte 1992 (26), Arora 1991 (27), Bell 1990 (28), Brownlee 2010 (29), Oosthuizen 2000 (30), Van Horn 1988 (31), Van Horn 1991 (32), Roberts 1981 (33), Scott 1994 (34), Gascon 1996 (35), Liljeberg 1996 (36), Agren 1996 (37), Behall 1999 (38), Morgan 2002 (39), Jenkins 2000 (40), Wong 2010 (41), John 2002 (42), Sacks 1984 (43), Birketvedt 2002 (44), Liao 2007 (45), Hermsdorff 2011 (46), Johansson-Persson 2014 (47), Chang 2013 (48), Maskarinec 1999 (49), Smith-Warner 2000 (50), Sheridan 2007 (51), Rock 1997 (52), Pecis 1994 (53), Prescott 1988 (54), Singh 1994 (55), Mori 1994 (56), Dunstan 1997 (57), Njike 2010 (58), Christensen 2013 (59), Rideout 2013 (60), Ramprasath 2014 (61), Kondo 2014 (62), Jang 2001 (63), Wallace 2013 (64), Cox 1998 (65), Neville 2013 (66), Onning 1999 (67), Surai 2000 (68), Berg 2003 (69), Meyer 2004 (70), Roberts 1994 (71), Poulter 1994 (72), Kazemzadeh 2014 (73), Weerts 2011 (74), Smith 2002 (75), Bradbury 2006 (76), Ros 2004 (77), Aadland 2015 (78), Abdullah 2015 (79), Abete 2009 (80), Abete 2009 (81), Adamsson 2015 (82), Mori 1999 (83), Davy 2002 (84), Jenkins 2002 (85), Keogh 2003 (86), Hall 2005 (87), Laaksonen 2005 (88), Watzl 2005 (89), de Mello 2006 (90), Hall 2006 (91), Wennersberg 2009 (92), Liu 2010 (93), Foster 2012 (94), Azadbakht 2013 (95), Bakhtiary 2012 (96), Balfego 2016 (97), Baumgartner 2013 (98), Behall 2006 (99), Behall 2004 (100), Azadbakht 2003 (101), Bento 2014 (102), Berry 2010 (103), Jaceldo-Siegl 2004 (104), Ghadirian 1995 (105), Bahr 2015 (106), Bird 2008 (107), Blesso 2013 (108), Blesso 2013 (109), Brennan 2010 (110), Knopp 2003 (111), Campos 2015 (112), Casas-Agustench 2011 (113), Cha 2014 (114), Hill 2015 (115), Chen 2004 (116), Colpo 2014 (117), Jenkins 1999 (118), Daniels 2014 (119), Davidi 2011 (120), de Mello 2009 (121), Dhillon 2016 (122), Djuric 2006 (123), Drouin-Chartier 2015 |

Online Supporting Material

|               |                                                                                                                                                                                                                                                                                                                                                                                                                                                                                                                                                                                                                                                                                                                                                                                                                                                                                                                                                                                                                                                                                                                                                                                                                                                                                                                                                                                                                                                                                                                                                                                                                                                                                                                                                                                                                                                                      |
|---------------|----------------------------------------------------------------------------------------------------------------------------------------------------------------------------------------------------------------------------------------------------------------------------------------------------------------------------------------------------------------------------------------------------------------------------------------------------------------------------------------------------------------------------------------------------------------------------------------------------------------------------------------------------------------------------------------------------------------------------------------------------------------------------------------------------------------------------------------------------------------------------------------------------------------------------------------------------------------------------------------------------------------------------------------------------------------------------------------------------------------------------------------------------------------------------------------------------------------------------------------------------------------------------------------------------------------------------------------------------------------------------------------------------------------------------------------------------------------------------------------------------------------------------------------------------------------------------------------------------------------------------------------------------------------------------------------------------------------------------------------------------------------------------------------------------------------------------------------------------------------------|
|               | (124), Dugan 2016 (125), Durazzo 2014 (126), Ebrahimi-Mamaghani 2014 (127), Gross 2002 (128), Noakes 1996 (129), Wofford 2012 (130), Mercanligil 2007 (131), Mukuddem-Petersen 2007 (132), Pearce 2011 (133), Errazuriz 2017 (134), Dunstan 1999 (135), Fuller 2015 (136), Gardner 2005 (137), Gilbert 2011 (138), Gulati 2014 (139), Harder 2004 (140), Hartman 2010 (141), Hernandez-Alonso 2014 (142), Hunninghake 2000 (143), Geelen 2004 (144), Welty 2007 (145), Duane 1997 (146), Hilpert 2005 (147), Finley 2007 (148), Goodrow 2006 (149), Griel 2008 (150), Mutungi 2008 (151), Tey 2013 (152), Labonte 2014 (153), McEvoy 2015 (154), Jarvi 2016 (155), Jung 2014 (156), Jones 2013 (157), Magnúsdóttir 2014 (158), Lee 2016 (159), West 2005 (160), Kasliwal 2015 (161), Kim 2008 (162), Kim 2017 (163), Kwak 2012 (164), Lacaille 2000 (165), Lee 2014 (166), Li 2011 (167), Lowndes 2015 (168), de Simone 2011 (169), Lukaczer 2006 (170), Ma 2010 (171), Mah 2017 (172), Maki 2010 (173), McGeoch 2013 (174), McKiernan 2010 (175), Melanson 2006 (176), Mutungi 2010 (177), Sabate 1993 (178), Chandalia 2000 (179), Gilhooly 2008 (180), Rebholz 2013 (181), Rueda 2013 (182), Whittaker 2015 (183), Campos 2017 (184), Kim 2017 (185), Beck 2010 (186), Palacios 2011 (187), Shidfar 2009 (188), Pick 1996 (189), Ratliff 2009 (190), Rave 2007 (191), Parham 2014 (192), Carvalho 2015 (193), Saraf-Bank 2015 (194), Saraf-Bank 2016 (195), Nadeem 2014 (196), Simao 2014 (197), Spiller 1998 (198), St-Onge 2007 (199), Tapsell 2004 (200), Tapsell 2009 (201), Tapsell 2014 (202), Chakrabarty 2004 (203), Thompson 2005 (204), Thorp 2008 (205), van Nielen 2014 (206), Vanegas 2017 (207), Vazquez 2014 (208), Weickert 2011 (209), Whybrow 2006 (210), Wiebe 1984 (211), Wien 2003 (212), Wien 2010 (213), Wien 2014 (214), Zhang 2014 (215) |
| Meta-analysis | Pol 2013 (216), Mohammadifard 2015 (217), Ye 2012 (218), Kaiser 2014 (219), Mytton 2014 (220)                                                                                                                                                                                                                                                                                                                                                                                                                                                                                                                                                                                                                                                                                                                                                                                                                                                                                                                                                                                                                                                                                                                                                                                                                                                                                                                                                                                                                                                                                                                                                                                                                                                                                                                                                                        |
| No data       | Keenan 2002 (221)                                                                                                                                                                                                                                                                                                                                                                                                                                                                                                                                                                                                                                                                                                                                                                                                                                                                                                                                                                                                                                                                                                                                                                                                                                                                                                                                                                                                                                                                                                                                                                                                                                                                                                                                                                                                                                                    |
| Not RCT       | Jenkins 1983 (222), Orem 2013 (223)                                                                                                                                                                                                                                                                                                                                                                                                                                                                                                                                                                                                                                                                                                                                                                                                                                                                                                                                                                                                                                                                                                                                                                                                                                                                                                                                                                                                                                                                                                                                                                                                                                                                                                                                                                                                                                  |

Online Supporting Material

Supplemental Table 2: General study characteristics of the included trials investigating the effects of different food groups on various metabolic risk factors

| Reference                              | Country, Study Design                                            | Comparison Food groups          | Sample size | Mean age | Mean baseline BMI <sup>1</sup> | T2D <sup>2</sup> diabetic (%) | Female (%) | Duration, weeks | Food group 1                                              | Food group 2                                       | Energy restricted | Drop out             | Results                                                                                                                                                                                                                                                                                                                                                                                                                                            | Conflict of interest                   |
|----------------------------------------|------------------------------------------------------------------|---------------------------------|-------------|----------|--------------------------------|-------------------------------|------------|-----------------|-----------------------------------------------------------|----------------------------------------------------|-------------------|----------------------|----------------------------------------------------------------------------------------------------------------------------------------------------------------------------------------------------------------------------------------------------------------------------------------------------------------------------------------------------------------------------------------------------------------------------------------------------|----------------------------------------|
| Agebratt, 2016                         | Sweden, RCT <sup>3</sup> , parallel                              | F&V <sup>4</sup> vs. Nuts       | 30          | 24       | 22                             | 0%                            | 40%        | 8               | F&V: 7 kcal per kg body weight/d of fruit (e.g. 7 apples) | Nuts: 7 kcal per kg body weight/d of nuts (70 g/d) | NR <sup>5</sup>   | F & V: 0%<br>Nut: 0% | TC <sup>6</sup> (mmol/l)<br>F&V: 4.38 ± 0.91<br>Nuts: 3.95 ± 0.45<br><br>LDL-C <sup>7</sup> (mmol/l)<br>F&V: 2.43 ± 0.69<br>Nuts: 2.20 ± 0.42<br><br>HDL-C <sup>8</sup> (mmol/l)<br>F&V: 1.55 ± 0.43<br>Nuts: 1.39 ± 0.22<br><br>TG <sup>9</sup> (mmol/l)<br>F&V: 0.84 ± 0.38<br>Nuts: 0.80 ± 0.33<br><br>SBP <sup>10</sup> (mmHg)<br>F&V: 104.2 ± 7.1<br>Nuts: 111.7 ± 6.9<br><br>DBP <sup>11</sup> (mmHg)<br>F&V: 64.3 ± 8.0<br>Nuts: 64.9 ± 6.4 | No conflict of interest                |
| Ampatzoglou, 2015<br>Ampatzoglou, 2016 | UK <sup>12</sup> , RCT, crossover (washout: 4 wk <sup>13</sup> ) | Whole grains vs. Refined grains | 33          | 48.8     | 27.9                           | 0%                            | 64%        | 6               | Whole grains: >80 g/d                                     | Refined grains: <16 g/d of whole grains            | NR                | NR                   | TC (mmol/l)<br>Whole grains: 5.30±1.15<br>Refined grains: 5.30±1.15<br><br>LDL-C (mmol/l)<br>Whole grains: 3.60 ±0.57<br>Refined grains: 3.60±0.57<br><br>HDL-C (mmol/l)<br>Whole grains: 1.30±0.57<br>Refined grains: 1.20 ±0.57<br><br>TG (mmol/l)                                                                                                                                                                                               | Supported by Cereal Partners Worldwide |



Online Supporting Material

|                 |                                                    |                                 |    |    |    |    |     |   |                                                                                                 |                                                                                      |    |     |                                                                                                                                                                                                                                                                                                                                                                                                                                                                                                                                                                                                                               |                                                                                 |
|-----------------|----------------------------------------------------|---------------------------------|----|----|----|----|-----|---|-------------------------------------------------------------------------------------------------|--------------------------------------------------------------------------------------|----|-----|-------------------------------------------------------------------------------------------------------------------------------------------------------------------------------------------------------------------------------------------------------------------------------------------------------------------------------------------------------------------------------------------------------------------------------------------------------------------------------------------------------------------------------------------------------------------------------------------------------------------------------|---------------------------------------------------------------------------------|
|                 |                                                    |                                 |    |    |    |    |     |   |                                                                                                 |                                                                                      |    |     | Whole grains: 1.40 ±0.57<br>Refined grains: 1.40 ±0.57<br><br>CRP <sup>14</sup> (mg/l)<br>Whole grains: 1.60 ±2.30<br>Refined grains: 1.80 ±1.72                                                                                                                                                                                                                                                                                                                                                                                                                                                                              |                                                                                 |
| Andersson, 2007 | Sweden, RCT, crossover (washout: 6-8 wk)           | Whole grains vs. Refined grains | 30 | 59 | 28 | 0% | 73% | 6 | Whole grains: 50% whole grain per dry substance. The total amount of whole grain in was 112 g/d | Refined grains: 6 g/d dietary fiber                                                  | NR | 13% | TC (mmol/l)<br>Whole grains: 5.50 ±0.70<br>Refined grains: 5.50±0.70<br><br>LDL-C (mmol/l)<br>Whole grains: 3.70±0.70<br>Refined grains: 3.60±0.70<br><br>HDL-C (mmol/l)<br>Whole grains: 1.20±0.30<br>Refined grains: 1.20 ±0.30<br><br>TG (mmol/l)<br>Whole grains: 1.50 ±0.80<br>Refined grains: 1.60 ±1.0<br><br>CRP (mg/l)<br>Whole grains: 2.38 ±2.29<br>Refined grains: 2.34 ±1.57<br><br>SBP (mmHg)<br>Whole grains: 129 ±15<br>Refined grains: 130 ±15<br><br>DBP (mmHg)<br>Whole grains: 81±8.0<br>Refined grains: 81±9.0<br><br>FG <sup>15</sup> (mmol/l)<br>Whole grains: 5.30±0.80<br>Refined grains: 5.20 ±0.80 | Supported by food products from Lantmannen Food R&D AB, Wasa Bröd AB and ICA AB |
| Ashton, 2000    | AUS <sup>16</sup> , RCT, crossover (washout: 2 wk) | Legumes vs. Red meat            | 45 | 46 | 26 | 0% | 0%  | 4 | Legumes: Tofu diet was designed to replace 90-100% of the animal protein with 290 g/d of tofu   | Red meat: 150 g/d (raw weight) of cooked lean red meat, with all visible fat removed | NR | 7%  | TC (mmol/l)<br>Legumes: 5.42 ±1.02<br>Red meat: 5.65±0.93<br><br>LDL-C (mmol/l)<br>Legumes: 3.48±0.92<br>Red meat: 3.56±0.90<br><br>HDL-C (mmol/l)<br>Legumes: 1.24±0.27<br>Red meat: 1.32±0.34                                                                                                                                                                                                                                                                                                                                                                                                                               | Not reported                                                                    |

Online Supporting Material

|                                        |                                                    |                         |    |      |      |    |      |   |                                                                          |                                                                                 |    |    |                                                                                                                                                                                                                                                                                                                                                                                                                                                                                                                                                                                                               |                                                                                                                   |
|----------------------------------------|----------------------------------------------------|-------------------------|----|------|------|----|------|---|--------------------------------------------------------------------------|---------------------------------------------------------------------------------|----|----|---------------------------------------------------------------------------------------------------------------------------------------------------------------------------------------------------------------------------------------------------------------------------------------------------------------------------------------------------------------------------------------------------------------------------------------------------------------------------------------------------------------------------------------------------------------------------------------------------------------|-------------------------------------------------------------------------------------------------------------------|
|                                        |                                                    |                         |    |      |      |    |      |   |                                                                          |                                                                                 |    |    | TG (mmol/l)<br>Legumes: 1.62±0.99<br>Red meat: 1.77±0.95                                                                                                                                                                                                                                                                                                                                                                                                                                                                                                                                                      |                                                                                                                   |
| Azadbakht, 2007 a<br>Azadbakht, 2007 b | Iran,<br>RCT,<br>crossover<br>(washout: 4<br>wk)   | Legumes vs.<br>Red meat | 42 | NR   | NR   | 0% | 100% | 8 | Legumes:<br>30 g/d of soy<br>nuts                                        | Red meat:<br>One serving/d                                                      | NR | 0% | TC (mmol/l)<br>Legumes: 5.41 ±0.10<br>Red meat: 5.90±0.15<br><br>LDL-C (mmol/l)<br>Legumes: 3.06±0.5<br>Red meat: 3.47 ±0.55<br><br>HDL-C (mmol/l)<br>Legumes: 0.86 ±0.07<br>Red meat: 0.86±0.12<br><br>TG (mmol/l)<br>Legumes: 2.39 ±0.12<br>Red meat: 2.40±0.10<br><br>CRP (mg/l)<br>Legumes: 3.1 ±0.32<br>Red meat: 3.4±0.32<br><br>SBP (mmHg)<br>Legumes: 131 ± 6.49<br>Red meat: 131 ± 7.78<br><br>DBP (mmHg)<br>Legumes: 85 ± 3.2<br>Red meat: 84 ± 3.2<br><br>FG (mmol/l)<br>Legumes: 5.72 ± 0.18<br>Red meat: 6.22 ± 0.36<br><br>HOMA-IR <sup>17</sup><br>Legumes: 3.3 ± 0.19<br>Red meat: 3.9 ± 0.26 | No conflict of<br>interest                                                                                        |
| Beauchesne-<br>Rondeau,<br>2003        | Canada,<br>RCT,<br>crossover<br>(washout: 6<br>wk) | Fish vs.<br>Red meat    | 17 | 50.1 | 26.5 | 0% | 0%   | 4 | Fish:<br>Pollack, cod,<br>sole, and<br>haddock with <<br>1% fat for diet | Red meat:<br>Lean beef (lean<br>ground beef,<br>exterior round,<br>sirloin tip) | NR | NR | TC (mmol/l)<br>Fish: 5.60 ±0.82<br>Red meat: 5.40±0.82<br><br>LDL-C (mmol/l)<br>Fish: 4.20±0.82<br>Red meat: 4.00±0.82<br><br>HDL-C (mmol/l)                                                                                                                                                                                                                                                                                                                                                                                                                                                                  | Canadian Beef<br>Information<br>Centre with<br>funds obtained<br>from the Beef<br>Industry<br>Development<br>Fund |

Online Supporting Material

|                         |                                                              |                               |    |    |      |    |     |   |                                                                              |                                                                                        |    |     |                                                                                                                                                                                                                                                                                                                                                                                                                                         |                                                                                                         |
|-------------------------|--------------------------------------------------------------|-------------------------------|----|----|------|----|-----|---|------------------------------------------------------------------------------|----------------------------------------------------------------------------------------|----|-----|-----------------------------------------------------------------------------------------------------------------------------------------------------------------------------------------------------------------------------------------------------------------------------------------------------------------------------------------------------------------------------------------------------------------------------------------|---------------------------------------------------------------------------------------------------------|
|                         |                                                              |                               |    |    |      |    |     |   |                                                                              |                                                                                        |    |     | <p>Fish: 0.98±0.21<br/>Red meat: 0.95±0.20</p> <p>TG (mmol/l)<br/>Fish: 1.20±0.41<br/>Red meat: 1.30±0.41</p>                                                                                                                                                                                                                                                                                                                           |                                                                                                         |
| Berryman, 2015          | USA <sup>18</sup> ,<br><br>RCT,<br>crossover<br>(no washout) | Refined<br>grains vs.<br>Nuts | 48 | 50 | 26.2 | 0% | 46% | 6 | Refined grains:<br>106 g/d banana<br>muffin+ 2.7 g<br>butter (273<br>kcal/d) | Nuts:<br>42.5 g/d<br>unsalted, whole,<br>natural almonds<br>with skins (253<br>kcal/d) | NR | 23% | <p>TC (mmol/l)<br/>Refined grains: 5.46 ±0.69<br/>Nuts: 5.33 ±0.69</p> <p>LDL-C (mmol/l)<br/>Refined grains: 3.50 ±0.54<br/>Nuts: 3.34±0.54</p> <p>HDL-C (mmol/l)<br/>Refined grains: 1.26 ±0.35<br/>Nuts: 1.31±0.35</p> <p>TG (mmol/l)<br/>Refined grains: 1.55 ±0.62<br/>Nuts: 1.48±0.62</p> <p>CRP (mg/l)<br/>Refined grains: 1.64 ±2.56<br/>Nuts: 1.00±1.11</p> <p>FG (mmol/l)<br/>Refined grains: 4.87 ±0.5<br/>Nuts:4.84±0.54</p> | Almond Board of<br>California                                                                           |
| Burns-Whitmore,<br>2014 | USA,<br><br>RCT,<br>crossover<br>(washout: 4<br>wk)          | Nuts vs.<br>Eggs              | 20 | 38 | 23   | 0% | 80% | 8 | Nuts:<br>Walnuts 28.4 g,<br>6/wk                                             | Eggs:<br>Standard egg,<br>6/wk                                                         | NR | 30% | <p>TC (mmol/l)<br/>Nuts: 4.77 ±0.36<br/>Eggs: 5.09 ±0.36</p> <p>LDL-C (mmol/l)<br/>Nuts: 2.86 ±0.34<br/>Eggs: 3.03 ±0.34</p> <p>HDL-C (mmol/l)<br/>Nuts: 1.31 ±0.17<br/>Eggs: 1.33 ±0.17</p> <p>TG (mmol/l)<br/>Nuts: 0.92 ±0.19<br/>Eggs: 1.12 ±0.26</p> <p>CRP (mg/l)<br/>Nuts: 2.3 ±2.26<br/>Eggs: 1.95 ±0.120</p>                                                                                                                   | American<br>Egg Board<br>Fellowship,<br>California<br>Walnut<br>Commission,<br>Chino Valley<br>Ranchers |

Online Supporting Material

|              |                                           |                                 |     |       |      |    |     |    |                                                                                                                                        |                                                                                                                                            |    |    |                                                                                                                                                                                                                                                                                                                                                                                                 |                         |
|--------------|-------------------------------------------|---------------------------------|-----|-------|------|----|-----|----|----------------------------------------------------------------------------------------------------------------------------------------|--------------------------------------------------------------------------------------------------------------------------------------------|----|----|-------------------------------------------------------------------------------------------------------------------------------------------------------------------------------------------------------------------------------------------------------------------------------------------------------------------------------------------------------------------------------------------------|-------------------------|
| Chen, 2006   | USA,<br>RCT,<br>parallel                  | Whole grains vs. Refined grains | 110 | 47.9  | 28.9 | 0% | 60% | 12 | Whole grains: 60 g/d of Quaker oat bran concentrate as a muffin and 84 g/d of Quaker Oatmeal Squares                                   | Refined grains: 93 g/d refined wheat as a muffin and 42 g/d of Kellogg's Corn Flakes                                                       | NR | 7% | TC (mmol/l)<br>Whole grains: -0.063±0.59<br>Refined grains: 0.0 ±0.47<br><br>LDL-C (mmol/l)<br>Whole grains: -0.05 ±0.49<br>Refined grains: -0.017 ±0.43<br><br>HDL-C (mmol/l)<br>Whole grains: 0.0 ±0.20<br>Refined grains: 0.04 ±0.21<br><br>TG (mmol/l)<br>Whole grains: 0 ±0.40<br>Refined grains: -0.05±0.55<br><br>FG (mmol/l)<br>Whole grains: -0.04 ±0.53<br>Refined grains: -0.04±0.68 | No conflict of interest |
| Cobiac, 1990 | AUS,<br>RCT,<br>crossover<br>(no washout) | Refined grains vs. Legumes      | 20  | 29-65 | NR   | NR | 0%  | 4  | Refined grains: Canned spaghetti in tomato sauce and cheese                                                                            | Legumes: Baked beans in tomato sauce                                                                                                       | NR | NR | TC (mmol/l)<br>Refined grains: 6.32 ±0.67<br>Legumes: 6.29 ±0.89<br><br>LDL-C (mmol/l)<br>Refined grains: 4.63 ±0.54<br>Legumes: 4.61 ±0.85<br><br>HDL-C (mmol/l)<br>Refined grains: 1.26 ±0.22<br>Legumes: 1.22 ±0.22<br><br>TG (mmol/l)<br>Refined grains: 1.25 ±0.36<br>Legumes: 1.26 ±0.36<br><br>FG (mmol/l)<br>Refined grains: 4.89 ±0.27<br>Legumes: 4.86±0.18                           | Heinz Food Company      |
| Cooper, 2017 | USA,<br>RCT,                              | Whole grains vs. Refined grains | 46  | 25.8  | 23.4 | 0% | 54% | 6  | Whole grains: Whole grain cookies, muffins and baking mixes; the others were commercially prepared items: bread, ready to eat cereals, | Refined grains: Refined grain cookies, muffins and baking mixes; the others were commercially prepared items: bread, ready to eat cereals, | NR | NR | HDL-C (mmol/l)<br>Whole grains: -0.06 ±0.20<br>Refined grains: 0.04 ±0.13<br><br>TG (mmol/l)<br>Whole grains: 0.07 ±0.6<br>Refined grains: 0.031±0.54<br><br>FG (mmol/l)<br>Whole grains: -0.02 ±0.53                                                                                                                                                                                           | No conflict of interest |

Online Supporting Material

|                                                    |                        |                             |     |      |      |    |      |    |                                                                   |                                                             |    |     |                                                                                                                                                                                                                                                                                                                                                                                                                                                  |                                                                                                |
|----------------------------------------------------|------------------------|-----------------------------|-----|------|------|----|------|----|-------------------------------------------------------------------|-------------------------------------------------------------|----|-----|--------------------------------------------------------------------------------------------------------------------------------------------------------------------------------------------------------------------------------------------------------------------------------------------------------------------------------------------------------------------------------------------------------------------------------------------------|------------------------------------------------------------------------------------------------|
|                                                    |                        |                             |     |      |      |    |      |    | couscous, crackers, pastas, rice, and tortillas                   | couscous, crackers, pastas, rice, and tortillas             |    |     | Refined grains: 0.16±0.44                                                                                                                                                                                                                                                                                                                                                                                                                        |                                                                                                |
| Daly, 2014                                         | AUS, RCT, parallel     | Red meat vs. Refined grains | 100 | 72.9 | 27.7 | NR | 100% | 16 | Red meat: ~220 g (raw weight) lean red meat to be consumed 6 d/wk | Refined grains: ≥1 serving carbohydrates (rice and pasta)/d | NR | 9%  | TC (mmol/l)<br>Red meat: -0.25 ±0.76<br>Refined grains: -0.22±0.51<br><br>LDL-C (mmol/l)<br>Red meat: -0.19 ±0.69<br>Refined grains: -0.20±0.51<br><br>HDL-C (mmol/l)<br>Red meat: -0.01±0.15<br>Refined grains: -0.02±0.17<br><br>TG (mmol/l)<br>Red meat: -0.11±0.69<br>Refined grains: 0.01±0.37<br><br>SBP (mmHg)<br>Red meat: -6.6±15.6<br>Refined grains: -3.5±17.03<br><br>DBP (mmHg)<br>Red meat: -3.5±8.7<br>Refined grains: -0.3±12.26 | Grant from Meat and Livestock Australia Ltd                                                    |
| Engel, 2017<br><br>Bruun, 2015<br><br>Maersk, 2012 | Denmark, RCT, parallel | Dairy vs. SSB <sup>19</sup> | 29  | 37.8 | 31.1 | 0% | 59%  | 24 | Dairy: 1 L/d iso-caloric semi skim milk                           | SSB: 1 L/d of regular cola                                  | NR | 17% | TC (mmol/l)<br>Dairy: 5.17 ±0.89<br>SSB: 5.25 ±1.05<br><br>LDL-C (mmol/l)<br>Dairy: 3.21 ±0.77<br>SSB: 3.32 ±0.86<br><br>HDL-C (mmol/l)<br>Dairy: 1.23 ±0.31<br>SSB: 1.21 ±0.34<br><br>TG (mmol/l)<br>Dairy: 1.61 ±0.81<br>SSB: 1.60 ±0.86<br><br>SBP (mmHg)<br>Dairy: 121.2 ±12.00<br>SSB: 125.9 ±10.85<br><br>DBP (mmHg)<br>Dairy: 72.8 ±9.30                                                                                                  | Some authors received research grants from Arla Foods and the Danish Dairy Research Foundation |

Online Supporting Material

|                                     |                                                                          |                           |    |      |      |    |     |    |                                                                                                                                                                                          |                                                                                                  |           |    |                                                                                                                                                                                                                                                                                                                                                         |                                 |
|-------------------------------------|--------------------------------------------------------------------------|---------------------------|----|------|------|----|-----|----|------------------------------------------------------------------------------------------------------------------------------------------------------------------------------------------|--------------------------------------------------------------------------------------------------|-----------|----|---------------------------------------------------------------------------------------------------------------------------------------------------------------------------------------------------------------------------------------------------------------------------------------------------------------------------------------------------------|---------------------------------|
|                                     |                                                                          |                           |    |      |      |    |     |    |                                                                                                                                                                                          |                                                                                                  |           |    | SSB: 77.5 ±7.48<br>FG (mmol/l)<br>Dairy: 5.69 ±1.05<br>SSB: 5.62 ±0.67<br><br>HOMA-IR (mmol/l)<br>Dairy: 1.76 ±1.47<br>SSB: 1.17 ±0.47                                                                                                                                                                                                                  |                                 |
| Foerster, 2014                      | Germany,<br><br>RCT,<br>crossover<br>(washout: 3 wk)                     | Whole grains vs. Red meat | 20 | 40.1 | 24.4 | 0% | 50% | 10 | Whole grains:<br>Low intake of red meat products, i.e., not more than 30g/d, and high amounts of whole grains products resulting in a daily intake of approximately 40 g/d dietary fiber | Red meat:<br>200 g/d minimal amounts of dietary fiber                                            | NR        | 0% | TC (mmol/l)<br>Whole grains: 5.30 ±1.0<br>Red meat: 5.20±0.80<br><br>TG (mmol/l)<br>Whole grains: 1.60 ±1.0<br>Red meat: 1.50±0.80<br><br>CRP (mg/l)<br>Whole grains: 1.90 ±3.80<br>Red meat: 1.40±1.20                                                                                                                                                 | Not reported                    |
| Freese, 2002<br><br>Freese, 2004    | Finland/<br>Sweden,<br><br>RCT,<br>parallel                              | F&V vs. Refined grains    | 77 | 25.1 | 22.6 | 0% | 74% | 6  | F&V:<br>All berries and apples as well as most vegetables were of Finnish origin and were included in the diet as such or as little processed as possible                                | Refined grains:<br>Rich in sugar or starch (e.g., sugar, wheat bread, pasta, rice, and potatoes) | NR        | 4% | TC (mmol/l)<br>F&V: -0.12 ±0.63<br>Refined grains: 0.07 ±0.54<br><br>LDL-C (mmol/l)<br>F&V: -0.03 ±0.60<br>Refined grains: 0.12 ±0.50<br><br>HDL-C (mmol/l)<br>F&V: -0.09 ±0.19<br>Refined grains: -0.07 ±0.19<br><br>TG (mmol/l)<br>F&V: -0.02 ±0.40<br>Refined grains: 0.02 ±0.28<br><br>CRP (mg/l)<br>F&V: -0.28 ±6.37<br>Refined grains: -3.15 ±9.9 | Not reported                    |
| Gebauer, 2008<br><br>Holligan, 2014 | USA,<br><br>RCT,<br>crossover<br>(washout/<br>compliance<br>break: 2 wk) | Nuts vs. Refined grains   | 28 | 48   | 26.8 | 0% | 64% | 4  | Nuts:<br>Pistachio doses ranged from 32-63g/d and from 63-126g/d                                                                                                                         | Refined grains:<br>Pretzels and baked potato chips                                               | 2100 kcal | 4% | TC (mmol/l)<br>Nuts: 4.97 ±0.53<br>Refined grains: 5.42 ±0.53<br><br>LDL-C (mmol/l)<br>Nuts: 3.03±0.53<br>Refined grains: 3.42 ±0.26                                                                                                                                                                                                                    | California Pistachio Commission |

Online Supporting Material

|                                                              |                                                     |                                                    |     |       |      |    |     |    |                                                                                                                                                                                                                             |                                                                                                                                   |    |     |                                                                                                                                                                                                                                                                                                                                                                                                                                                                                                                                                                                                                                        |                                                                                         |
|--------------------------------------------------------------|-----------------------------------------------------|----------------------------------------------------|-----|-------|------|----|-----|----|-----------------------------------------------------------------------------------------------------------------------------------------------------------------------------------------------------------------------------|-----------------------------------------------------------------------------------------------------------------------------------|----|-----|----------------------------------------------------------------------------------------------------------------------------------------------------------------------------------------------------------------------------------------------------------------------------------------------------------------------------------------------------------------------------------------------------------------------------------------------------------------------------------------------------------------------------------------------------------------------------------------------------------------------------------------|-----------------------------------------------------------------------------------------|
|                                                              |                                                     |                                                    |     |       |      |    |     |    |                                                                                                                                                                                                                             |                                                                                                                                   |    |     | <p>HDL-C (mmol/l)<br/>Nuts: 1.46 ±0.52<br/>Refined grains: 1.43 ±0.16</p> <p>TG (mmol/l)<br/>Nuts: 1.24 ±0.53<br/>Refined grains: 1.40 ±0.53</p> <p>FG (mmol/l)<br/>Nuts: 5.08 ±0.31<br/>Refined grains: 5.11 ±0.31</p> <p>HOMA-IR<br/>Nuts: 1.84 ±5.98<br/>Refined grains: 1.94 ±5.98</p>                                                                                                                                                                                                                                                                                                                                             |                                                                                         |
| <p>Giacco, 2013</p> <p>Giacco, 2014</p> <p>Vetrani, 2016</p> | <p>Italy/<br/>Finland,</p> <p>RCT,<br/>parallel</p> | <p>Whole<br/>grains vs.<br/>Refined<br/>grains</p> | 123 | 40-65 | 31.5 | 0% | 53% | 12 | <p>Whole grains:<br/>Wheat bread<br/>(plus some<br/>endosperm rye<br/>bread), whole<br/>wheat pasta,<br/>barley kernels,<br/>wholegrain oat<br/>biscuits and<br/>breakfast cereals<br/>(all bran sticks<br/>and flakes)</p> | <p>Refined grains:<br/>Wheat bread,<br/>rice, pizza,<br/>cornmeal<br/>porridge, and<br/>breakfast cereals<br/>(rice krispies)</p> | NR | 16% | <p>TC (mmol/l)<br/>Whole grains: 5.25 ±1.14<br/>Refined grains: 5.31±0.90</p> <p>LDL-C (mmol/l)<br/>Whole grains: 3.31 ±0.98<br/>Refined grains: 3.41±0.78</p> <p>HDL-C (mmol/l)<br/>Whole grains: 1.16±0.34<br/>Refined grains: 1.16±0.31</p> <p>TG (mmol/l)<br/>Whole grains: 1.65 ±0.86<br/>Refined grains: 1.56 ±0.65</p> <p>CRP (mg/l)<br/>Whole grains: 1.36 ±2.01<br/>Refined grains: 1.74 ±1.41</p> <p>SBP (mmHg)<br/>Whole grains: 128 ±15<br/>Refined grains: 130 ±17</p> <p>DBP (mmHg)<br/>Whole grains: 81±9.0<br/>Refined grains: 82±9.0</p> <p>FG (mmol/l)<br/>Whole grains: 5.94±0.56<br/>Refined grains: 6.00±0.61</p> | <p>Barilla G&amp;R<br/>F.lli. SpA,<br/>Parma, Italy and<br/>Raiso Nutrition<br/>Ltd</p> |

Online Supporting Material

|                      |                              |                                          |    |       |      |    |     |    |                                                           |                                                             |                                                                                                         |     |                                                                                                                                                                                                                                                                                                                                                                                                                                            |                                                                         |
|----------------------|------------------------------|------------------------------------------|----|-------|------|----|-----|----|-----------------------------------------------------------|-------------------------------------------------------------|---------------------------------------------------------------------------------------------------------|-----|--------------------------------------------------------------------------------------------------------------------------------------------------------------------------------------------------------------------------------------------------------------------------------------------------------------------------------------------------------------------------------------------------------------------------------------------|-------------------------------------------------------------------------|
| Grieger, 2014        | AUS,<br>RCT,<br>parallel     | Fish vs.<br>Red meat                     | 83 | 69.6  | 26.4 | 0% | NR  | 8  | Fish:<br>Eight servings of<br>mixed fish per<br>fortnight | Red meat:<br>Eight servings of<br>red meat per<br>fortnight | NR                                                                                                      | 4%  | TC (mmol/l)<br>Fish: 5.60 ±0.66<br>Red meat: 5.40±1.21<br><br>LDL-C (mmol/l)<br>Fish: 3.40 ±0.66<br>Red meat: 3.40±0.61<br><br>HDL-C (mmol/l)<br>Fish: 1.80 ±0.66<br>Red meat: 1.70±0.61<br><br>TG (mmol/l)<br>Fish: 1.00 ±0.66<br>Red meat: 1.30±0.61<br><br>CRP (mg/l)<br>Fish: 1.00 ±0.97<br>Red meat: 0.80±0.90<br><br>SBP (mmHg)<br>Fish: 124 ±19.67<br>Red meat: 126±18.24<br><br>DBP (mmHg)<br>Fish: 68 ±13.11<br>Red meat: 66±6.08 | Australian<br>Seafood<br>Corporate<br>Research Centre                   |
| Gormley, 1979        | Ireland,<br>RCT,<br>parallel | Legumes vs.<br>Refined<br>grains         | 53 | 30-50 | 24.8 | 0% | 11% | 6  | Legumes:<br>Freeze dried peas<br>(30 g/d)                 | Refined grains:<br>Cornflakes (20<br>g/d)                   | NR                                                                                                      | NR  | TC (mmol/l)<br>Legumes: 5.98±0.46<br>Refined grains: 6.40±0.49                                                                                                                                                                                                                                                                                                                                                                             | Irish Sugar and<br>Becton<br>Dickinson<br>supplied foods                |
| Harris-Jackson, 2014 | USA,<br>RCT,<br>parallel     | Whole<br>grains vs.<br>Refined<br>grains | 50 | 46.1  | 33.3 | 0% | 50% | 12 | Whole grains:<br>163 and 301 g/d<br>whole grains          | Refined grains:<br>0 g/d whole<br>grains                    | Isocaloric<br>(first 6<br>wk)<br><br>Hypo-<br>caloric<br>(reduced<br>by -500<br>kcal<br>second 6<br>wk) | 17% | LDL-C (mmol/l)<br>Whole grains: -0.31±0.47<br>Refined grains: -0.33±0.47<br><br>HDL-C (mmol/l)<br>Whole grains: -0.13 ±0.12<br>Refined grains: -0.06±0.12<br><br>TG (mmol/l)<br>Whole grains: -0.023 ±0.50<br>Refined grains: -0.19 ±0.51<br><br>CRP (mg/l)<br>Whole grains: -0.60 ±2.06<br>Refined grains: -0.60±2.0<br><br>SBP (mmHg)                                                                                                    | Bell Institute of<br>Health and<br>Nutrition<br>(General Mills,<br>Inc) |



Online Supporting Material

|                                    |                    |                             |    |      |      |    |     |    |                                                                                                                                                                              |    |     |                                                                                                                                                                                                                                                                                                                                                                       |                                                                                                                                                                                                                                                                                        |  |
|------------------------------------|--------------------|-----------------------------|----|------|------|----|-----|----|------------------------------------------------------------------------------------------------------------------------------------------------------------------------------|----|-----|-----------------------------------------------------------------------------------------------------------------------------------------------------------------------------------------------------------------------------------------------------------------------------------------------------------------------------------------------------------------------|----------------------------------------------------------------------------------------------------------------------------------------------------------------------------------------------------------------------------------------------------------------------------------------|--|
|                                    |                    |                             |    |      |      |    |     |    |                                                                                                                                                                              |    |     |                                                                                                                                                                                                                                                                                                                                                                       | Whole grains: -7.20 ±9.50<br>Refined grains: -9.20±9.50<br><br>DBP (mmHg)<br>Whole grains: -2.40±7.0<br>Refined grains: -5.90±7.0<br><br>FG (mmol/l)<br>Whole grains: -0.24±0.30<br>Refined grains: -0.05±0.31<br><br>HOMA-IR<br>Whole grains: -0.20±0.96<br>Refined grains: -0.20±1.0 |  |
| Haub, 2005                         | USA, RCT, parallel | Legumes vs. Red meat        | 21 | 65   | 28.2 | 0% | 0%  | 12 | Legumes: Soy-based products that provided 0.6 g protein/kg/d<br><br>Red meat: 0.6 g protein/kg/d from beef-containing foods (cube steak, ground beef, and beef tips)         | NR | NR  | TC (mmol/l)<br>Legumes: -0.06 ±0.70<br>Red meat: 0.30±0.30<br><br>LDL-C (mmol/l)<br>Legumes: -0.08 ±0.60<br>Red meat: 0.30±0.40<br><br>HDL-C (mmol/l)<br>Legumes: -0.10±0.10<br>Red meat: 0.08±0.10<br><br>TG (mmol/l)<br>Legumes: 0.27 ±0.60<br>Red meat: -0.16±0.50                                                                                                 | National Cattlemen's Beef Association and the Cattlemen's Beef Board                                                                                                                                                                                                                   |  |
| Hodgson, 2006<br><br>Hodgson, 2007 | AUS, RCT, parallel | Refined grains vs. Red meat | 60 | 58.6 | 27.7 | 0% | 37% | 8  | Refined grains: Carbohydrate-rich foods including bread, pasta, rice, potatoes, and breakfast cereals<br><br>Red meat: ~215 g/d raw weight, depending on usual energy intake | NR | 18% | TC (mmol/l)<br>Refined grains: 4.90 ±0.80<br>Red meat: 4.90±0.80<br><br>LDL-C (mmol/l)<br>Refined grains: 2.70 ±0.80<br>Red meat: 3.00±0.70<br><br>HDL-C (mmol/l)<br>Refined grains: 1.48 ±0.44<br>Red meat: 1.42±0.41<br><br>TG (mmol/l)<br>Refined grains: 1.35 ±0.76<br>Red meat: 1.31±1.16<br><br>CRP (mg/l)<br>Refined grains: 1.59 ±1.60<br>Red meat: 1.30±0.92 | Red Meat and Human Nutrition grant provided by Meat and Livestock Australia Limited                                                                                                                                                                                                    |  |

Online Supporting Material

|                                                        |                                                   |                      |    |      |      |      |     |   |                                                                                                                                                                                                                            |                                         |                       |     |                                                                                                                                                                                                                                                                                                                                                                                                                                                                                       |                         |
|--------------------------------------------------------|---------------------------------------------------|----------------------|----|------|------|------|-----|---|----------------------------------------------------------------------------------------------------------------------------------------------------------------------------------------------------------------------------|-----------------------------------------|-----------------------|-----|---------------------------------------------------------------------------------------------------------------------------------------------------------------------------------------------------------------------------------------------------------------------------------------------------------------------------------------------------------------------------------------------------------------------------------------------------------------------------------------|-------------------------|
|                                                        |                                                   |                      |    |      |      |      |     |   |                                                                                                                                                                                                                            |                                         |                       |     | <p>SBP (mmHg)<br/>Refined grains: 139.7 ±11.90<br/>Red meat: 131.8±12.80</p> <p>DBP (mmHg)<br/>Refined grains: 77.9 ±7.40<br/>Red meat: 77.6±9.0</p> <p>FG (mmol/l)<br/>Refined grains: 5.10 ±0.80<br/>Red meat: 4.70±0.60</p> <p>HbA1c<sup>20</sup> (%)<br/>Refined grains: 5.20 ±0.50<br/>Red meat: 5.40±0.40</p> <p>HOMA-IR<br/>Refined grains: 1.58 ±1.02<br/>Red meat: 2.77±2.99</p>                                                                                             |                         |
| Hosseinpour-Niazi, 2014<br><br>Hosseinpour-Niazi, 2015 | Iran,<br><br>RCT,<br>crossover<br>(washout: 4 wk) | Legumes vs. Red meat | 31 | 58.1 | 27.8 | 100% | 77% | 8 | Legumes:<br>Two servings of red meat were replaced by different types of cooked legumes such as lentils, chickpeas, peas and beans for 3 d per wk; half a cup of cooked legumes was considered as one serving of red meat. | Red meat:<br>Two servings/d of red meat | Not energy restricted | 23% | <p>TC (mmol/l)<br/>Legumes: 4.04 ±0.89<br/>Red meat: 4.18±1.00</p> <p>LDL-C (mmol/l)<br/>Legumes: 2.05 ±0.72<br/>Red meat: 2.31±0.75</p> <p>HDL-C (mmol/l)<br/>Legumes: 1.24 ±0.37<br/>Red meat: 1.21±0.37</p> <p>TG (mmol/l)<br/>Legumes: 1.38 ±0.67<br/>Red meat: 1.41±0.67</p> <p>CRP (mg/l)<br/>Legumes: 2.20 ±4.60<br/>Red meat: 2.90±5.00</p> <p>SBP (mmHg)<br/>Legumes: 120 ±16.70<br/>Red meat: 132±16.70</p> <p>DBP (mmHg)<br/>Legumes: 75 ±16.70<br/>Red meat: 77±11.13</p> | No conflict of interest |

Online Supporting Material

|                                        |                                                     |                                 |    |    |      |      |     |    |                                                                                                                                                                                                         |                                                                                                                                       |    |     |                                                                                                                                                                                                                                                                                                                                                                                                                                                                                                                                                       |                                          |
|----------------------------------------|-----------------------------------------------------|---------------------------------|----|----|------|------|-----|----|---------------------------------------------------------------------------------------------------------------------------------------------------------------------------------------------------------|---------------------------------------------------------------------------------------------------------------------------------------|----|-----|-------------------------------------------------------------------------------------------------------------------------------------------------------------------------------------------------------------------------------------------------------------------------------------------------------------------------------------------------------------------------------------------------------------------------------------------------------------------------------------------------------------------------------------------------------|------------------------------------------|
|                                        |                                                     |                                 |    |    |      |      |     |    |                                                                                                                                                                                                         |                                                                                                                                       |    |     | FG (mmol/l)<br>Legumes: 6.36 ±2.28<br>Red meat: 7.12±2.73                                                                                                                                                                                                                                                                                                                                                                                                                                                                                             |                                          |
| Jenkins, 2002<br><br>Jenkins, 2008 a/b | Canada,<br><br>RCT,<br>crossover<br>(washout: 2 wk) | Nuts vs. Refined grains         | 27 | 64 | 25.7 | 0%   | 44% | 4  | Nuts:<br>Level of supplement intake was based on subjects' estimated daily energy requirement (<1600 kcal: 50 g/d almonds)                                                                              | Refined grains:<br>Level of supplement intake was based on subjects' estimated daily energy requirement (<1600 kcal: 100 g/d muffins) | NR | 37% | TC (mmol/l)<br>Nuts: 6.21±0.78<br>Refined grains: 6.44±0.78<br><br>LDL-C (mmol/l)<br>Nuts: 4.01±0.62<br>Refined grains: 4.22±0.68<br><br>HDL-C (mmol/l)<br>Nuts: 1.45±0.47<br>Refined grains: 1.43±0.47<br><br>TG (mmol/l)<br>Nuts: 1.64±0.57<br>Refined grains: 1.80±0.62<br><br>CRP (mg/l)<br>Nuts: 2.27±3.58<br>Refined grains: 2.37±2.34<br><br>SBP (mmHg)<br>Nuts: 121±15.59<br>Refined grains: 121±10.39<br><br>DBP (mmHg)<br>Nuts: 76.0±10.39<br>Refined grains: 76.0±10.39<br><br>FG (mmol/l)<br>Nuts: 4.91±0.10<br>Refined grains: 4.77±0.10 | funding from the California Almond Board |
| Jenkins, 2002                          | Canada,<br><br>RCT,<br>crossover<br>(washout: 8 wk) | Whole grains vs. Refined grains | 23 | 63 | 26.7 | 100% | 30% | 12 | Whole grains:<br>High wheat bran bread and breakfast cereal were provided at the same caloric intake as in the control phase, with 5.9% energy as fat, 18.8% protein, and 75.4% available carbohydrate, | Refined grains:<br>White bread and a low-fibre breakfast cereal, equivalent to ~24% of their total caloric intake                     | NR | 48% | TC (mmol/l)<br>Whole grains: 4.97±0.82<br>Refined grains: 4.87±0.72<br><br>LDL-C (mmol/l)<br>Whole grains: 3.00±0.72<br>Refined grains: 2.99±0.67<br><br>HDL-C (mmol/l)<br>Whole grains: 1.23±0.22<br>Refined grains: 1.17±0.14<br><br>TG (mmol/l)                                                                                                                                                                                                                                                                                                    | Loblaw Brands Limited, Kraft Canada      |

Online Supporting Material

|               |                       |                          |     |      |      |      |     |    |                                                                                                                                   |                                                                                                                                                                         |    |    |                                                                                                                                                                                                                                                                                                                                                                                                                                                                                      |                                                             |
|---------------|-----------------------|--------------------------|-----|------|------|------|-----|----|-----------------------------------------------------------------------------------------------------------------------------------|-------------------------------------------------------------------------------------------------------------------------------------------------------------------------|----|----|--------------------------------------------------------------------------------------------------------------------------------------------------------------------------------------------------------------------------------------------------------------------------------------------------------------------------------------------------------------------------------------------------------------------------------------------------------------------------------------|-------------------------------------------------------------|
|               |                       |                          |     |      |      |      |     |    | with 19 g/d dietary fiber                                                                                                         |                                                                                                                                                                         |    |    | <p>Whole grains: 1.63 ±0.96<br/>Refined grains: 1.53 ±0.86</p> <p>CRP (mg/l)<br/>Whole grains: 3.79 ±7.14<br/>Refined grains: 4.8±9.21</p> <p>SBP (mmHg)<br/>Whole grains: 129 ±14.40<br/>Refined grains: 131±14.40</p> <p>DBP (mmHg)<br/>Whole grains: 75±4.8<br/>Refined grains: 76±4.8</p> <p>FG (mmol/l)<br/>Whole grains: 7.5±1.44<br/>Refined grains: 7.8±1.92</p> <p>HbA1c (%)<br/>Whole grains: 7.2±0.96<br/>Refined grains: 7.4±1.44</p>                                    |                                                             |
| Jenkins, 2012 | Canada, RCT, parallel | Legumes vs. Whole grains | 121 | 59.5 | 30.7 | 100% | 50% | 12 | Legumes: The target legume consumption was 1 cup/d (approximately 190 g/d, or 2 servings/d) of cooked beans, chickpeas or lentils | Whole grains: A high wheat fiber diet was achieved by consumption of whole wheat and whole grain carbohydrate foods (whole wheat breakfast cereals, breads, brown rice) | NR | 7% | <p>TC (mmol/l)<br/>Legumes: 3.86 ±1.00<br/>Whole grains: 4.17±1.11</p> <p>LDL-C (mmol/l)<br/>Legumes: 2.10 ±0.70<br/>Whole grains: 2.33±0.90</p> <p>HDL-C (mmol/l)<br/>Legumes: 1.11 ±0.31<br/>Whole grains: 1.24±0.27</p> <p>TG (mmol/l)<br/>Legumes: 1.44 ±0.93<br/>Whole grains: 1.29±0.82</p> <p>SBP (mmHg)<br/>Legumes: 118 ±11.61<br/>Whole grains: 118±11.71</p> <p>DBP (mmHg)<br/>Legumes: 69 ±11.61<br/>Whole grains: 70±7.8</p> <p>FG (mmol/l)<br/>Legumes: 7.33 ±1.27</p> | ABIP through the PURENet and the Saskatchewan Pulse Growers |

Online Supporting Material

|                |                                                  |                                 |     |           |           |    |      |    |                                                                                                                         |                                                                                                                                       |    |    |                                                                                                                                                                                                                                                                                                              |                                                                              |
|----------------|--------------------------------------------------|---------------------------------|-----|-----------|-----------|----|------|----|-------------------------------------------------------------------------------------------------------------------------|---------------------------------------------------------------------------------------------------------------------------------------|----|----|--------------------------------------------------------------------------------------------------------------------------------------------------------------------------------------------------------------------------------------------------------------------------------------------------------------|------------------------------------------------------------------------------|
|                |                                                  |                                 |     |           |           |    |      |    |                                                                                                                         |                                                                                                                                       |    |    | Whole grains: 7.05±1.29<br>HbA1c (%)<br>Legumes: 6.90 ±0.77<br>Whole grains: 6.90±0.39                                                                                                                                                                                                                       |                                                                              |
| Johnston, 1998 | USA,<br>RCT,<br>parallel                         | Whole grains vs. Refined grains | 124 | 40-70     | NR        | 0% | 40%  | 12 | Whole grains: 90 g/d of a whole grain ready-to-eat cereal                                                               | Refined grains: 90 g/d of corn flakes                                                                                                 | NR | 8% | TC (mmol/l)<br>Whole grains: 6.04±0.61<br>Refined grains: 6.23±0.54<br><br>LDL-C (mmol/l)<br>Whole grains: 3.93±0.49<br>Refined grains: 4.15±0.42<br><br>HDL-C (mmol/l)<br>Whole grains: 1.29±0.33<br>Refined grains: 1.25±0.28<br><br>TG (mmol/l)<br>Whole grains: 1.81 ±0.71<br>Refined grains: 1.85 ±0.84 | General Mills                                                                |
| Juntunen, 2003 | Finland,<br>RCT,<br>crossover<br>(washout: 8 wk) | Whole grains vs. Refined grains | 20  | 59        | 27.5      | 0% | 100% | 8  | Whole grains: High-fiber rye bread (~17% dietary fiber) was prepared by increasing the content of rye bran in the bread | Refined grains: White-wheat breads (~2.8% dietary fiber) produced from refined wheat flour were offered during the wheat bread period | NR | NR | FG (mmol/l)<br>Whole grains: 5.41±0.34<br>Refined grains: 5.43±0.34                                                                                                                                                                                                                                          | Fazer Bakeries Ltd, Vaasan & Vaasan Oy                                       |
| Karl, 2017     | USA,<br>RCT,<br>parallel                         | Whole grains vs. Refined grains | 81  | 54.5      | 25.7      | 0% | 40%  | 6  | Whole grains: Primary whole grain in the whole grain-rich diet was wheat, but oats and brown rice were also included    | Refined grains: Low –dietary fiber diet                                                                                               | NR | NR | FG (mmol/l)<br>Whole grains: -0.11±0.34<br>Refined grains: 0.05±0.66<br><br>HOMA-IR<br>Whole grains: -0.20±1.25<br>Refined grains: 0.02±1.31                                                                                                                                                                 | Bell Institute of Health and Nutrition, General Mills Inc., Kraft Foods Inc. |
| Karmally, 2005 | USA,<br>RCT,<br>parallel                         | Whole grains vs. Refined grains | 152 | 46.3-51.5 | 28.4-30.2 | 0% | NR   | 6  | Whole grains: 45g/d portions whole grain cereals                                                                        | Refined grains: 45 g/d portions corn cereals                                                                                          | NR | 4% | TC (mmol/l)<br>Whole grains: -0.28±0.56<br>Refined grains: 0.03±0.47<br><br>LDL-C (mmol/l)<br>Whole grains: -0.24±0.53<br>Refined grains: 0.03±0.45<br><br>HDL-C (mmol/l)<br>Whole grains: 0.0±0.1                                                                                                           | Supported by General Mills                                                   |

Online Supporting Material

|               |                                     |                                 |    |    |      |    |     |    |                                                                                                                                                                                                                  |                                        |                                         |    |                                                                                                                                                                                                                                                                                                                                                                                                                                                                                                                                                                                                                                   |                                                            |
|---------------|-------------------------------------|---------------------------------|----|----|------|----|-----|----|------------------------------------------------------------------------------------------------------------------------------------------------------------------------------------------------------------------|----------------------------------------|-----------------------------------------|----|-----------------------------------------------------------------------------------------------------------------------------------------------------------------------------------------------------------------------------------------------------------------------------------------------------------------------------------------------------------------------------------------------------------------------------------------------------------------------------------------------------------------------------------------------------------------------------------------------------------------------------------|------------------------------------------------------------|
|               |                                     |                                 |    |    |      |    |     |    |                                                                                                                                                                                                                  |                                        |                                         |    | Refined grains: 0.01±0.1<br>TG (mmol/l)<br>Whole grains: -0.07±0.50<br>Refined grains: 0.02 ±0.36                                                                                                                                                                                                                                                                                                                                                                                                                                                                                                                                 |                                                            |
| Katcher, 2008 | USA, RCT, parallel                  | Whole grains vs. Refined grains | 50 | 46 | 35.8 | 0% | 50% | 12 | Whole grains: Given a target number of daily whole-grain servings 4, 5, 6, or 7 servings/d based on the number of grain servings recommended in the 2005 dietary guidelines for Americans for their energy needs | Refined grains: Avoid wholegrain foods | Energy restricted (reduced by 500 kcal) | 6% | TC (mmol/l)<br>Whole grains: -0.28±0.47<br>Refined grains: -0.15±0.45<br><br>LDL-C (mmol/l)<br>Whole grains: -0.21±0.39<br>Refined grains: -0.09±0.41<br><br>HDL-C (mmol/l)<br>Whole grains: -0.05±0.09<br>Refined grains: 0.013±0.08<br><br>TG (mmol/l)<br>Whole grains: -0.043±0.42<br>Refined grains: -0.1±0.69<br><br>CRP (mg/l)<br>Whole grains: -2.40±5.10<br>Refined grains: 0.20±2.90<br><br>SBP (mmHg)<br>Whole grains: -2.60±7.90<br>Refined grains: -6.70±8.50<br><br>DBP (mmHg)<br>Whole grains: -2.50±7.0<br>Refined grains: -3.10±5.90<br><br>FG (mmol/l)<br>Whole grains: -0.08±0.37<br>Refined grains: -0.07±0.26 | General Mills Bell Institute of Health and Human Nutrition |
| Katz, 2005    | USA, RCT, crossover (washout: 4 wk) | Whole grains vs. Eggs           | 49 | 56 | 28.8 | 0% | 40% | 6  | Whole grains: 60 g/d uncooked whole oats                                                                                                                                                                         | Eggs: Two eggs/d                       | NR                                      | 2% | TC (mmol/l)<br>Whole grains: 5.03 ±0.79<br>Eggs: 5.32±0.92<br><br>LDL-C (mmol/l)<br>Whole grains: 3.02 ±0.80<br>Eggs: 3.34±0.84<br><br>HDL-C (mmol/l)<br>Whole grains: 1.38 ±0.43<br>Eggs: 1.33±0.39                                                                                                                                                                                                                                                                                                                                                                                                                              | American Egg Board*Egg Nutrition Centre                    |

Online Supporting Material

|                                 |                                      |                                 |    |    |    |    |     |   |                                                                                                                                                                    |                                             |    |     |                                                                                                                                                                                                                                                                                                                                                                                                                                        |                                          |
|---------------------------------|--------------------------------------|---------------------------------|----|----|----|----|-----|---|--------------------------------------------------------------------------------------------------------------------------------------------------------------------|---------------------------------------------|----|-----|----------------------------------------------------------------------------------------------------------------------------------------------------------------------------------------------------------------------------------------------------------------------------------------------------------------------------------------------------------------------------------------------------------------------------------------|------------------------------------------|
|                                 |                                      |                                 |    |    |    |    |     |   |                                                                                                                                                                    |                                             |    |     | <p>TG (mmol/l)<br/>Whole grains: 1.38 ±0.85<br/>Eggs: 1.43±0.82</p> <p>SBP (mmHg)<br/>Whole grains: 124.1 ±12.5<br/>Eggs: 124.9±10.9</p> <p>DBP (mmHg)<br/>Whole grains: 77.5 ±8.7<br/>Eggs: 77.4±7.0</p>                                                                                                                                                                                                                              |                                          |
| Katz, 2015                      | USA, RCT, crossover (washout: 4 wk)  | Refined grains vs. Eggs         | 32 | 67 | 30 | 0% | 19% | 6 | Refined grains: High-carbohydrate breakfast consisted of any of the following choices during each day of the treatment period: bagel, waffles, pancakes, or cereal | Eggs: Two eggs/d                            | NR | 6%  | <p>TC (mmol/l)<br/>Refined grains: 4.05 ±0.71<br/>Eggs: 4.10±0.74</p> <p>LDL-C (mmol/l)<br/>Refined grains: 2.10 ±0.66<br/>Eggs: 2.08±0.69</p> <p>HDL-C (mmol/l)<br/>Refined grains: 1.41 ±0.43<br/>Eggs: 1.46±0.47</p> <p>TG (mmol/l)<br/>Refined grains: 1.20 ±0.33<br/>Eggs: 1.24±0.43</p> <p>SBP (mmHg)<br/>Refined grains: 135.5 ±14.9<br/>Eggs: 132.8±14.1</p> <p>DBP (mmHg)<br/>Refined grains: 76.7±6.9<br/>Eggs: 77.2±6.1</p> | Not reported                             |
| Kirwan, 2016<br><br>Malin, 2018 | USA, RCT, crossover (washout: 10 wk) | Whole grains vs. Refined grains | 33 | 39 | 33 | 0% | 82% | 8 | Whole grains: 50 g/1000 kcal in each diet                                                                                                                          | Refined grains: 50 g/1000 kcal in each diet | NR | 18% | <p>TC (mmol/l)<br/>Whole grains: -0.52±1.11<br/>Refined grains: -0.31±0.59</p> <p>LDL-C (mmol/l)<br/>Whole grains: -0.37 ±1.03<br/>Refined grains: -0.19±0.54</p> <p>HDL-C (mmol/l)<br/>Whole grains: -0.09 ±0.20<br/>Refined grains: -0.06±0.15</p> <p>TG (mmol/l)<br/>Whole grains: -0.12 ±0.42</p>                                                                                                                                  | Investigator-initiated grant from Nestle |

Online Supporting Material

|             |                      |                                 |    |      |    |      |     |   |                                                                     |                                                                                             |               |    |                                                                                                                                                                                                                                                                                                                                                                                                                                                                                                                                                                                                                                                                                                                                                                                                                                                                                                                                                                                                                                  |         |
|-------------|----------------------|---------------------------------|----|------|----|------|-----|---|---------------------------------------------------------------------|---------------------------------------------------------------------------------------------|---------------|----|----------------------------------------------------------------------------------------------------------------------------------------------------------------------------------------------------------------------------------------------------------------------------------------------------------------------------------------------------------------------------------------------------------------------------------------------------------------------------------------------------------------------------------------------------------------------------------------------------------------------------------------------------------------------------------------------------------------------------------------------------------------------------------------------------------------------------------------------------------------------------------------------------------------------------------------------------------------------------------------------------------------------------------|---------|
|             |                      |                                 |    |      |    |      |     |   |                                                                     |                                                                                             |               |    | <p>Refined grains: <math>-0.11 \pm 0.31</math></p> <p>CRP (mg/l)<br/>Whole grains: <math>0.80 \pm 5.36</math><br/>Refined grains: <math>-2.3 \pm 7.05</math></p> <p>FG (mmol/l)<br/>Whole grains: <math>-0.17 \pm 0.65</math><br/>Refined grains: <math>0.07 \pm 0.54</math></p> <p>HbA1c (%)<br/>Whole grains: <math>-0.13 \pm 0.36</math><br/>Refined grains: <math>-0.07 \pm 0.20</math></p>                                                                                                                                                                                                                                                                                                                                                                                                                                                                                                                                                                                                                                  |         |
| Kondo, 2017 | Japan, RCT, parallel | Whole grains vs. Refined grains | 28 | 66.7 | 24 | 100% | 36% | 8 | Whole grains: Brown rice as a staple food for 10 out of 21 meals/wk | Refined grains: Instructed to consume white rice as a staple food for 10 out of 21 meals/wk | 28-30 kcal/kg | 3% | <p>TC (mmol/l)<br/>Whole grains: <math>4.89 \pm 0.81</math><br/>Refined grains: <math>4.90 \pm 0.78</math></p> <p>LDL-C (mmol/l)<br/>Whole grains: <math>2.91 \pm 0.67</math><br/>Refined grains: <math>2.98 \pm 0.62</math></p> <p>HDL-C (mmol/l)<br/>Whole grains: <math>1.54 \pm 0.35</math><br/>Refined grains: <math>1.40 \pm 0.31</math></p> <p>CRP (mg/l)<br/>Whole grains: <math>5.0 \pm 5.0</math><br/>Refined grains: <math>5.0 \pm 6.0</math></p> <p>SBP (mmHg)<br/>Whole grains: <math>119 \pm 12.40</math><br/>Refined grains: <math>120.1 \pm 12.50</math></p> <p>DBP (mmHg)<br/>Whole grains: <math>68.4 \pm 8.30</math><br/>Refined grains: <math>69.0 \pm 7.8</math></p> <p>FG (mmol/l)<br/>Whole grains: <math>6.35 \pm 0.86</math><br/>Refined grains: <math>6.98 \pm 1.54</math></p> <p>HbA1c (%)<br/>Whole grains: <math>6.50 \pm 0.40</math><br/>Refined grains: <math>6.70 \pm 0.60</math></p> <p>HOMA-IR<br/>Whole grains: <math>1.83 \pm 3.02</math><br/>Refined grains: <math>2.09 \pm 1.34</math></p> | Sunstar |



Online Supporting Material

|                                  |                        |                                 |    |      |      |    |      |    |                                                                                                                             |                                                                                                                                      |    |     |                                                                                                                                                                                                                                                                                                                                                                                                                                                                                                                                                                                                                                                                                                                                                                                                    |                                                                                                           |
|----------------------------------|------------------------|---------------------------------|----|------|------|----|------|----|-----------------------------------------------------------------------------------------------------------------------------|--------------------------------------------------------------------------------------------------------------------------------------|----|-----|----------------------------------------------------------------------------------------------------------------------------------------------------------------------------------------------------------------------------------------------------------------------------------------------------------------------------------------------------------------------------------------------------------------------------------------------------------------------------------------------------------------------------------------------------------------------------------------------------------------------------------------------------------------------------------------------------------------------------------------------------------------------------------------------------|-----------------------------------------------------------------------------------------------------------|
| Kristensen, 2012                 | Denmark, RCT, parallel | Whole grains vs. Refined grains | 79 | 59.7 | 30.2 | 0% | 100% | 12 | Whole grains: Foods provided 105 g/d whole grains                                                                           | Refined grains: 62 g/d of refined bread, 60 g/d refined pasta, and 28 g/d biscuits                                                   | NR | 9%  | <p>TC (mmol/l)<br/>Whole grains: 5.59±0.98<br/>Refined grains: 5.91±0.99</p> <p>LDL-C (mmol/l)<br/>Whole grains: 3.73±0.93<br/>Refined grains: 3.96±0.87</p> <p>HDL-C (mmol/l)<br/>Whole grains: 1.27 ±0.31<br/>Refined grains: 1.34±0.23</p> <p>TG (mmol/l)<br/>Whole grains: 1.29 ±0.62<br/>Refined grains: 1.33±0.70</p> <p>CRP (mg/l)<br/>Whole grains: 0.85±1.66<br/>Refined grains: 1.07±1.83</p> <p>SBP (mmHg)<br/>Whole grains: 132±12.32<br/>Refined grains: 132±17.49</p> <p>DBP (mmHg)<br/>Whole grains: 83.8 ±9.86<br/>Refined grains: 84.6±8.16</p> <p>FG (mmol/l)<br/>Whole grains: 5.70±0.55<br/>Refined grains: 5.55±0.41</p> <p>HbA1c (%)<br/>Whole grains: 5.72±0.18<br/>Refined grains: 5.71±0.17</p> <p>HOMA-IR<br/>Whole grains: 1.80 ±1.05<br/>Refined grains: 1.80±0.99</p> | Barilla and Nestle                                                                                        |
| Lankinen, 2011<br>Lankinen, 2014 | Finland, RCT, parallel | Whole grains vs. Refined grains | 69 | 58.5 | 31.2 | 0% | 49%  | 12 | Whole grains: Participants replaced their habitually used cereal products with breads having a low postprandial glucose and | Refined grains: Participants replaced their habitually used breads with refined wheat breads (dietary fiber 3–4.3 g/100 g) and other | NR | 26% | <p>TC (mmol/l)<br/>Whole grains: 5.30±1.10<br/>Refined grains: 5.40±1.0</p> <p>LDL-C (mmol/l)<br/>Whole grains: 3.20±0.90<br/>Refined grains: 3.40±0.80</p> <p>HDL-C (mmol/l)</p>                                                                                                                                                                                                                                                                                                                                                                                                                                                                                                                                                                                                                  | Fazer bakeries Oy, Vaasan & Vaasan Oy, KE Leipa Oy, Leipomo Ruistahka, Leipomo Koskelonseutu, Raisio Oyj, |

Online Supporting Material

|                |                                         |                                 |    |    |      |    |     |   |                                                                                                                               |                                                                                             |    |    |                                                                                                                                                                                                                                                                                                                                                                                                                                                                                                 |                                                        |
|----------------|-----------------------------------------|---------------------------------|----|----|------|----|-----|---|-------------------------------------------------------------------------------------------------------------------------------|---------------------------------------------------------------------------------------------|----|----|-------------------------------------------------------------------------------------------------------------------------------------------------------------------------------------------------------------------------------------------------------------------------------------------------------------------------------------------------------------------------------------------------------------------------------------------------------------------------------------------------|--------------------------------------------------------|
|                |                                         |                                 |    |    |      |    |     |   | insulin response, contributing up to 20–25% of total energy intake + whole grain oat biscuits: 8–8.5 g/100 g of dietary fiber | cereal products, e.g. porridge or pasta, with low fiber products (<6 g/100 g dietary fiber) |    |    | Whole grains: 1.20±0.4<br>Refined grains: 1.30±0.3<br><br>TG (mmol/l)<br>Whole grains: 1.70±1.0<br>Refined grains: 1.60±0.70<br><br>CRP (mg/l)<br>Whole grains: 1.20±1.72<br>Refined grains: 1.3±1.14<br><br>SBP (mmHg)<br>Whole grains: 133±15<br>Refined grains: 135±13<br><br>DBP (mmHg)<br>Whole grains: 84±7.0<br>Refined grains: 86±6.0<br><br>FG (mmol/l)<br>Whole grains: 6.10±0.50<br>Refined grains: 6.20±0.50<br><br>HOMA-IR<br>Whole grains: 3.70±2.30<br>Refined grains: 3.70±1.90 | Pakkasmarja Oy and Joswola Oy are commercial companies |
| Leaf, 2009     | USA, RCT, crossover (no washout)        | Fish vs. Red meat               | 10 | 46 | 28.2 | NR | 40% | 4 | Fish: 276 g/2000 kcal of lean fish                                                                                            | Red meat: 276 g/2000 kcal of ground beef                                                    | NR | NR | TC (mmol/l)<br>Fish: 6.18 ±0.92<br>Red meat: 6.55±1.24<br><br>LDL-C (mmol/l)<br>Fish: 4.45 ±0.94<br>Red meat: 4.30±0.88<br><br>HDL-C (mmol/l)<br>Fish: 1.06 ±0.26<br>Red meat: 1.14±0.25<br><br>TG (mmol/l)<br>Fish: 2.60 ±1.00<br>Red meat: 2.97±0.87                                                                                                                                                                                                                                          | No conflict of interest                                |
| Leinonen, 2000 | Finland, RCT, crossover (washout: 4 wk) | Whole grains vs. Refined grains | 40 | 43 | 24.7 | 0% | 55% | 4 | Whole grains: 15g/d higher intake of dietary fiber compared to refined grains                                                 | Refined grains: 15g/d lower intake of dietary fiber compared to whole grains                | NR | 7% | TC (mmol/l)<br>Whole grains: 6.20±0.49<br>Refined grains: 6.45±0.45<br><br>LDL-C (mmol/l)<br>Whole grains: 4.35±0.88<br>Refined grains: 4.55±0.88                                                                                                                                                                                                                                                                                                                                               | Fazer Bakeries Ltd., Vaasan & Vaasan Ltd               |

Online Supporting Material

|          |                                                |                                 |    |      |      |    |      |    |                                                                                                                               |                                                              |                                              |     |                                                                        |                                                                        |  |
|----------|------------------------------------------------|---------------------------------|----|------|------|----|------|----|-------------------------------------------------------------------------------------------------------------------------------|--------------------------------------------------------------|----------------------------------------------|-----|------------------------------------------------------------------------|------------------------------------------------------------------------|--|
|          |                                                |                                 |    |      |      |    |      |    |                                                                                                                               |                                                              |                                              |     |                                                                        | HDL-C (mmol/l)<br>Whole grains: 1.35±0.47<br>Refined grains: 1.40±0.49 |  |
|          |                                                |                                 |    |      |      |    |      |    |                                                                                                                               |                                                              |                                              |     |                                                                        | TG (mmol/l)<br>Whole grains: 1.10±0.46<br>Refined grains: 1.15±0.47    |  |
| Li, 2003 | Japan,<br>RCT,<br>crossover<br>(washout: 4 wk) | Whole grains vs. Refined grains | 10 | 20.4 | 19.2 | 0% | 100% | 4  | Whole grains:<br>Replacing 30% of the carbohydrates in the standard diet with barley (0.58 g/d dietary fiber kg body weight ) | Refined grains:<br>0.39 g/d dietary fiber per kg body weight | 40 kcal kg per body weight                   | 0%  | TC (mmol/l)<br>Whole grains: 3.06±0.54<br>Refined grains: 3.57±0.60    | Haku-Baku Company                                                      |  |
|          |                                                |                                 |    |      |      |    |      |    |                                                                                                                               |                                                              |                                              |     | LDL-C (mmol/l)<br>Whole grains: 1.08±0.22<br>Refined grains: 1.37±0.24 |                                                                        |  |
|          |                                                |                                 |    |      |      |    |      |    |                                                                                                                               |                                                              |                                              |     | HDL-C (mmol/l)<br>Whole grains: 1.58±0.28<br>Refined grains: 1.65±0.31 |                                                                        |  |
|          |                                                |                                 |    |      |      |    |      |    |                                                                                                                               |                                                              |                                              |     | TG (mmol/l)<br>Whole grains: 0.85±0.14<br>Refined grains: 0.99±0.11    |                                                                        |  |
|          |                                                |                                 |    |      |      |    |      |    |                                                                                                                               |                                                              |                                              |     | FG (mmol/l)<br>Whole grains: 4.94±0.77<br>Refined grains: 5.44±0.77    |                                                                        |  |
|          |                                                |                                 |    |      |      |    |      |    |                                                                                                                               |                                                              |                                              |     | HbA1c (%)<br>Whole grains: 5.10±0.80<br>Refined grains: 5.40±0.70      |                                                                        |  |
| Li, 2010 | USA,<br>RCT,<br>parallel                       | Nuts vs. Refined grains         | 59 | 46.4 | 30.5 | 0% | 81   | 12 | Nuts:<br>53 g/d salted pistachios                                                                                             | Refined grains:<br>56 g/d pretzels                           | Hypo-caloric (energy restricted by 500 kcal) | 10% | TC (mmol/l)<br>Nuts: 4.96±1.00<br>Refined grains: 4.74±1.06            | Not reported                                                           |  |
|          |                                                |                                 |    |      |      |    |      |    |                                                                                                                               |                                                              |                                              |     | LDL-C (mmol/l)<br>Nuts: 3.06±0.54<br>Refined grains: 3.57±0.60         |                                                                        |  |
|          |                                                |                                 |    |      |      |    |      |    |                                                                                                                               |                                                              |                                              |     | HDL-C (mmol/l)<br>Nuts: 1.11±0.34<br>Refined grains: 1.02±0.32         |                                                                        |  |
|          |                                                |                                 |    |      |      |    |      |    |                                                                                                                               |                                                              |                                              |     | TG (mmol/l)<br>Nuts: 0.99±0.40<br>Refined grains: 1.49±0.99            |                                                                        |  |
|          |                                                |                                 |    |      |      |    |      |    |                                                                                                                               |                                                              |                                              |     | FG (mmol/l)                                                            |                                                                        |  |

Online Supporting Material

|            |                     |                                 |     |      |       |    |     |    |                                                               |                                                                                                                                                             |                                           |     |                                                                                                                                                                                                                                                                                                                                                                                                                                                                                                                          |                                                        |
|------------|---------------------|---------------------------------|-----|------|-------|----|-----|----|---------------------------------------------------------------|-------------------------------------------------------------------------------------------------------------------------------------------------------------|-------------------------------------------|-----|--------------------------------------------------------------------------------------------------------------------------------------------------------------------------------------------------------------------------------------------------------------------------------------------------------------------------------------------------------------------------------------------------------------------------------------------------------------------------------------------------------------------------|--------------------------------------------------------|
|            |                     |                                 |     |      |       |    |     |    |                                                               |                                                                                                                                                             |                                           |     | Nuts: 4.65±0.69<br>Refined grains: 4.94±0.64                                                                                                                                                                                                                                                                                                                                                                                                                                                                             |                                                        |
| Li, 2016   | USA, RCT, parallel  | Legumes vs. Red meat            | 34  | 53.5 | 30.85 | 0% | 68% | 4  | Legumes: Soy/legume products                                  | Red meat: Lean beef/pork                                                                                                                                    | Energy restricted (reduced by 750 kcal/d) | 28% | TC (mmol/l)<br>Legumes: 3.77±0.64<br>Red meat: 4.05±0.74<br><br>LDL-C (mmol/l)<br>Legumes: 2.12 ±0.50<br>Red meat: 2.37±0.57<br><br>HDL-C (mmol/l)<br>Legumes: 1.14 ±0.20<br>Red meat: 1.09±0.20<br><br>TG (mmol/l)<br>Legumes: 1.17±0.42<br>Red meat: 1.29±0.42<br><br>SBP (mmHg)<br>Legumes: 112±13.74<br>Red meat: 110±9.62<br><br>DBP (mmHg)<br>Legumes: 70±8.24<br>Red meat: 68.7±6.87<br><br>FG (mmol/l)<br>Legumes: 5.06±0.38<br>Red meat: 5.00±0.46<br><br>HOMA-IR<br>Legumes: 1.46 ±0.78<br>Red meat: 2.00±1.59 | Beef Checkoff and the National Pork Board              |
| Maki, 2010 | USA, RCT, parallel  | Whole grains vs. Refined grains | 144 | 48.8 | 32    | 0% | 78% | 12 | Whole grains: Either two portions/d of whole-grain oat cereal | Refined grains: Low-fiber breakfast/snack foods (e.g., corn cereals, white toast, plain bagels and English muffins, pretzels, soda crackers, or rice cakes) | Energy restricted (reduced by 500 kcal/d) | 25% | TC (mmol/l)<br>Whole grains: -0.32±0.44<br>Refined grains: -0.17±0.45<br><br>LDL-C (mmol/l)<br>Whole grains: -0.35±0.31<br>Refined grains: -0.17±0.37                                                                                                                                                                                                                                                                                                                                                                    | General Mills Bell Institute of Health and Nutrition   |
| Maki, 2015 | USA, RCT, crossover | SSB vs. Dairy                   | 43  | 53.8 | 32.2  | 0% | 50% | 6  | SSB: 710 mL/d non-diet soda and 108 g/d non-dairy             | Dairy: 474 mL/d 2% milk and 170 g/d low-fat yogurt                                                                                                          | NR                                        | 23% | TC (mmol/l)<br>SSB: 5.02±1.08<br>Dairy: 5.02±0.92                                                                                                                                                                                                                                                                                                                                                                                                                                                                        | Funded by the Dairy Research Institute/ National Dairy |

Online Supporting Material

|                       |                                    |                                 |    |       |      |    |      |   |                                                                                                                                                                                                                                                                                          |                                                                                                                                      |    |     |                                                                                                                                                                                                                                    |                                    |
|-----------------------|------------------------------------|---------------------------------|----|-------|------|----|------|---|------------------------------------------------------------------------------------------------------------------------------------------------------------------------------------------------------------------------------------------------------------------------------------------|--------------------------------------------------------------------------------------------------------------------------------------|----|-----|------------------------------------------------------------------------------------------------------------------------------------------------------------------------------------------------------------------------------------|------------------------------------|
|                       | (washout: 2 wk)                    |                                 |    |       |      |    |      |   | pudding                                                                                                                                                                                                                                                                                  |                                                                                                                                      |    |     | LDL-C (mmol/l)<br>SSB: 3.19±0.83<br>Dairy: 3.19±0.74<br><br>HDL-C (mmol/l)<br>SSB: 1.10±0.26<br>Dairy: 1.16±0.29<br><br>TG (mmol/l)<br>SSB: 1.64±0.61<br>Dairy: 1.47±0.51<br><br>FG (mmol/l)<br>SSB: 5.72±0.65<br>Dairy: 5.61±0.55 | Council                            |
| McIntosh, 2003        | AUS, RCT, crossover (no washout)   | Whole grains vs. Refined grains | 28 | 40-65 | 30   | 0% | 0%   | 4 | Whole grains: 32 g/d dietary fiber, including wheat test foods as 140 g/d whole-meal bread, 40 g/d whole-meal wheat crispbread, and 50 g/d whole-wheat breakfast cereal. The high-fiber rye diet provided 32 g/d dietary fiber including rye test foods as 140 g/d whole-grain rye bread | Refined grains: 19 g/d dietary fiber, including low-dietray-fiber test foods as 140 g/d white bread, 40 g/d refined-wheat crispbread | NR | 10% | FG (mmol/l)<br>Whole grains: 5.60±0.79<br>Refined grains: 5.64±0.90                                                                                                                                                                | George Weston Foods Ltd            |
| Navas-Carretero, 2009 | Spain, RCT, crossover (no washout) | Fish vs. Red meat               | 25 | 18-30 | 22.1 | 0% | 100% | 8 | Fish: Two portions of salmon, two cans of water-packed tuna (56 g each), one can of sardines in olive oil, one portion of lean fish per wk                                                                                                                                               | Red meat: Five portions of red meat/wk                                                                                               | NR | NR  | TC (mmol/l)<br>Fish: -0.10±0.06<br>Red meat: -0.09±0.07<br><br>LDL-C (mmol/l)<br>Fish: -0.19±0.07<br>Red meat: -0.13±0.07<br><br>HDL-C (mmol/l)<br>Fish: 0.12±0.034<br>Red meat: 0.02±0.024<br><br>TG (mmol/l)<br>Fish: -0.02±0.04 | No conflict of interest to declare |

Online Supporting Material

|                                                  |                                       |                                 |    |      |      |    |     |    |                                                                                                 |                                                                                                                                                                          |            |    |                                                                                                                                                                                                                                                                                                                                                                                                                                                                                                                                     |                                                      |
|--------------------------------------------------|---------------------------------------|---------------------------------|----|------|------|----|-----|----|-------------------------------------------------------------------------------------------------|--------------------------------------------------------------------------------------------------------------------------------------------------------------------------|------------|----|-------------------------------------------------------------------------------------------------------------------------------------------------------------------------------------------------------------------------------------------------------------------------------------------------------------------------------------------------------------------------------------------------------------------------------------------------------------------------------------------------------------------------------------|------------------------------------------------------|
|                                                  |                                       |                                 |    |      |      |    |     |    |                                                                                                 |                                                                                                                                                                          |            |    | Red meat: 0.06±0.03                                                                                                                                                                                                                                                                                                                                                                                                                                                                                                                 |                                                      |
| Pereira, 2002                                    | USA, RCT, crossover (washout: 6-9 wk) | Whole grains vs. Refined grains | 11 | 41.6 | 30.2 | 0% | 50% | 6  | Whole grains: Bran, germ, and considerable dietary fiber, but were mostly ground to flour       | Refined grains: Refined grains, which contained no bran or germ and little dietary fiber                                                                                 | NR         | 8% | TG (mmol/l)<br>Whole grains: 5.20±0.27<br>Refined grains: 5.30±0.27                                                                                                                                                                                                                                                                                                                                                                                                                                                                 | Gift from General Mills                              |
| Pins, 2002                                       | USA, RCT, parallel                    | Whole grains vs. Refined grains | 88 | 47.6 | 30.9 | 0% | 49% | 12 | Whole grains: 60 g/d quaker whole-grain oatmeal, and 77 g/d Quaker Oat Squares                  | Refined grains: 65 g/d Malt-O-Meal Hot Wheat Cereal and 81 g/d Kellogg's Crispix                                                                                         | Isocaloric | 0% | TC (mmol/l)<br>Whole grains: 4.66±0.87<br>Refined grains: 5.34±1.11<br><br>LDL-C (mmol/l)<br>Whole grains: 3.03±0.74<br>Refined grains: 3.41±0.79<br><br>HDL-C (mmol/l)<br>Whole grains: 1.16±0.30<br>Refined grains: 1.12±0.26<br><br>TG (mmol/l)<br>Whole grains: 1.95±0.47<br>Refined grains: 2.08±0.46<br><br>SBP (mmHg)<br>Whole grains: -7.0±8.0<br>Refined grains: -1.0±9.0<br><br>DBP (mmHg)<br>Whole grains: -4.0±5.0<br>Refined grains: 1.0±6.0<br><br>FG (mmol/l)<br>Whole grains: 5.89±1.57<br>Refined grains: 6.66±2.0 | Quaker Oats Company                                  |
| Pittaway, 2006<br>Pittaway, 2007<br>Nestel, 2004 | AUS, RCT, crossover (no washout)      | Legumes vs. Whole grains        | 47 | 53   | 27.6 | NR | NR  | 5  | Legumes: 140 g/d of canned, drained chickpeas, chickpea bread, and chickpea shortbread biscuits | Whole grains: Whole-meal (wheat) bread, high-fiber (wheat) breakfast cereals, and shortbread biscuits that the participants purchased from their usual grocery suppliers | NR         | NR | TC (mmol/l)<br>Legumes: 5.75±1.19<br>Whole grains: 5.98±1.22<br><br>LDL-C (mmol/l)<br>Legumes: 3.71±1.02<br>Whole grains: 3.89±1.06<br><br>HDL-C (mmol/l)<br>Legumes: 1.39±0.41<br>Whole grains: 1.41±0.41                                                                                                                                                                                                                                                                                                                          | Australian Grains Research & Development Corporation |

Online Supporting Material

|                                   |                                                          |                                          |    |       |      |    |     |   |                                                    |                                                                                           |           |     |                                                                                                                                                                                                                                                                                                                             |                                                                                                               |
|-----------------------------------|----------------------------------------------------------|------------------------------------------|----|-------|------|----|-----|---|----------------------------------------------------|-------------------------------------------------------------------------------------------|-----------|-----|-----------------------------------------------------------------------------------------------------------------------------------------------------------------------------------------------------------------------------------------------------------------------------------------------------------------------------|---------------------------------------------------------------------------------------------------------------|
|                                   |                                                          |                                          |    |       |      |    |     |   |                                                    |                                                                                           |           |     | <p>TG (mmol/l)<br/>Legumes: 1.46±1.06<br/>Whole grains: 1.50±0.75</p> <p>FG (mmol/l)<br/>Legumes: 4.90±0.40<br/>Whole grains: 5.10±0.50</p>                                                                                                                                                                                 |                                                                                                               |
| Rajaram, 2009<br><br>Chiang, 2012 | USA,<br><br>RCT,<br>crossover<br>(no washout)            | Nuts vs.<br>Fish                         | 25 | 23-65 | 24.8 | 0% | 44% | 4 | Nut:<br>42.5 g walnuts/<br>(2400 kcal), 6<br>d/wk) | Fish:<br>113 g salmon,<br>twice/wk)                                                       | 2400 kcal | 7%  | <p>TC (mmol/l)<br/>Nuts: 4.87 ±0.90<br/>Fish: 5.33 ±0.90</p> <p>LDL-C (mmol/l)<br/>Nuts: 2.77 ±0.75<br/>Fish: 3.20 ±0.75</p> <p>HDL-C (mmol/l)<br/>Nuts: 1.18 ±0.25<br/>Fish: 1.23 ±0.25</p> <p>TG (mmol/l)<br/>Nuts: 1.11 ±0.55<br/>Fish: 1.00 ±0.55</p> <p>CRP (mg/l)<br/>Nuts: 2.22 ±1.36<br/>Fish: 2.44 ±1.50</p>       | California<br>Walnut<br>Commission                                                                            |
| Reynolds, 2000                    | USA,<br><br>RCT,<br>crossover<br>(washout: 4<br>wk)      | Whole<br>grains vs.<br>Refined<br>grains | 43 | 27-68 | NR   | 0% | NR  | 4 | Whole grains:<br>Whole grain oats<br>(43-64 g/d)   | Refined grains:<br>Country Corn<br>Flakes (43-64<br>g/d)                                  | NR        | NR  | <p>TC (mmol/l)<br/>Whole grains: 5.87±0.56<br/>Refined grains: 5.83±0.60</p> <p>LDL-C (mmol/l)<br/>Whole grains: 3.98±0.52<br/>Refined grains: 3.96±0.55</p> <p>HDL-C (mmol/l)<br/>Whole grains: 1.29±0.31<br/>Refined grains: 1.19±0.28</p> <p>TG (mmol/l)<br/>Whole grains: 1.30 ±0.47<br/>Refined grains: 1.48 ±0.78</p> | General Mills                                                                                                 |
| Roager, 2017                      | Denmark,<br><br>RCT,<br>crossover<br>(washout: ≥6<br>wk) | Whole<br>grains vs.<br>Refined<br>grains | 50 | 48.6  | 28.9 | 0% | 64% | 8 | Whole grains:<br>≥75 g/d of whole<br>grains        | Refined grains:<br><10 g/d of whole<br>grains during the<br>refined grain<br>intervention | NR        | 17% | <p>TC (mmol/l)<br/>Whole grains: 5.20 ±1.00<br/>Refined grains: 5.40±0.90</p> <p>LDL-C (mmol/l)<br/>Whole grains: 3.10 ±0.70<br/>Refined grains: 3.10 ±0.80</p>                                                                                                                                                             | One author<br>supported by<br>unrestricted<br>grants from<br>Cereal Partners<br>Worldwide, a<br>joint venture |

Online Supporting Material

|                |                    |                                 |    |      |      |    |     |   |                                                              |                                      |                                                                               |    |                                                                                                                                                                                                                                                                                                                                                                                                                                                                                                                                                                                                                                             |                                         |
|----------------|--------------------|---------------------------------|----|------|------|----|-----|---|--------------------------------------------------------------|--------------------------------------|-------------------------------------------------------------------------------|----|---------------------------------------------------------------------------------------------------------------------------------------------------------------------------------------------------------------------------------------------------------------------------------------------------------------------------------------------------------------------------------------------------------------------------------------------------------------------------------------------------------------------------------------------------------------------------------------------------------------------------------------------|-----------------------------------------|
|                |                    |                                 |    |      |      |    |     |   |                                                              |                                      |                                                                               |    | <p>HDL-C (mmol/l)<br/>Whole grains: 1.30 ±0.30<br/>Refined grains: 1.30 ±0.30</p> <p>TG (mmol/l)<br/>Whole grains: 1.30 ±0.70<br/>Refined grains: 1.40 ±0.80</p> <p>CRP (mg/l)<br/>Whole grains: 4.20 ±6.80<br/>Refined grains: 5.0 ±5.80</p> <p>SBP (mmHg)<br/>Whole grains: 124 ±12.60<br/>Refined grains: 124.1±12.4</p> <p>DBP (mmHg)<br/>Whole grains: 79.80 ±8.90<br/>Refined grains: 79.4±9.30</p> <p>FG (mmol/l)<br/>Whole grains: 5.60 ±0.60<br/>Refined grains: 5.70 ±0.60</p> <p>HbA1c (%)<br/>Whole grains: 5.4±0.30<br/>Refined grains: 5.5±0.30</p> <p>HOMA-IR<br/>Whole grains: 2.90±1.50<br/>Refined grains: 3.20 ±1.80</p> | between Nestle SA and General Mills Ltd |
| Saltzman, 2001 | USA, RCT, parallel | Whole grains vs. Refined grains | 43 | 44.6 | 26.4 | 0% | 53% | 8 | Whole grains: Whole grains oats (45 g dry weight/ 1000 kcal) | Refined grains: Mixed refined grains | First 2 wk weight maintenance, followed by a 6-wk weight-loss phase (phase 2) | NR | <p>TC (mmol/l)<br/>Whole grains: -0.87±0.47<br/>Refined grains: -0.34±0.50</p> <p>LDL-C (mmol/l)<br/>Whole grains: -0.60 ±0.41<br/>Refined grains: -0.20±0.41</p> <p>HDL-C (mmol/l)<br/>Whole grains: 0.09 ±0.13<br/>Refined grains: -0.04±0.14</p> <p>TG (mmol/l)<br/>Whole grains: -0.36 ±0.36<br/>Refined grains: -0.22±0.23</p>                                                                                                                                                                                                                                                                                                         | Quaker Oats Company                     |



Online Supporting Material

|                                  |                                                     |                               |    |      |      |      |    |   |                                                                                                  |                                                                                 |    |     |                                                                                                                                                                                                                                                                                                                                                                                                                                                                                                                                                                                                                                                                          |                                  |
|----------------------------------|-----------------------------------------------------|-------------------------------|----|------|------|------|----|---|--------------------------------------------------------------------------------------------------|---------------------------------------------------------------------------------|----|-----|--------------------------------------------------------------------------------------------------------------------------------------------------------------------------------------------------------------------------------------------------------------------------------------------------------------------------------------------------------------------------------------------------------------------------------------------------------------------------------------------------------------------------------------------------------------------------------------------------------------------------------------------------------------------------|----------------------------------|
|                                  |                                                     |                               |    |      |      |      |    |   |                                                                                                  |                                                                                 |    |     | SBP (mmHg)<br>Whole grains: $-6.0 \pm 7.0$<br>Refined grains: $-1.0 \pm 10.0$<br><br>DBP (mmHg)<br>Whole grains: $-4.0 \pm 6.0$<br>Refined grains: $-3.0 \pm 5.0$<br><br>FG (mmol/l)<br>Whole grains: $-0.21 \pm 0.29$<br>Refined grains: $0.0 \pm 0.90$<br><br>HOMA-IR<br>Whole grains: $-1.10 \pm 1.20$<br>Refined grains: $-0.50 \pm 2.10$                                                                                                                                                                                                                                                                                                                            |                                  |
| Sauder, 2014<br><br>Sauder, 2015 | USA,<br><br>RCT,<br>crossover<br>(washout: 2<br>wk) | Nuts vs.<br>Refined<br>grains | 30 | 56.1 | 31.2 | 100% | NR | 4 | Nuts:<br>Roasted<br>pistachios that<br>provided 20% of<br>daily energy<br>(range: 59-<br>128g/d) | Refined grains:<br>Low-fat or fat-<br>free snacks<br>pretzels, string<br>cheese | NR | 12% | TC (mmol/l)<br>Nuts: $4.00 \pm 0.33$<br>Refined grains: $4.15 \pm 0.33$<br><br>LDL-C (mmol/l)<br>Nuts: $2.39 \pm 0.33$<br>Refined grains: $2.43 \pm 0.33$<br><br>HDL-C (mmol/l)<br>Nuts: $1.06 \pm 0.06$<br>Refined grains: $1.04 \pm 0.06$<br><br>TG (mmol/l)<br>Nuts: $1.56 \pm 0.55$<br>Refined grains: $1.84 \pm 0.55$<br><br>CRP (mg/l)<br>Nuts: $1.98 \pm 0.88$<br>Refined grains: $2.16 \pm 0.88$<br><br>SBP (mmHg)<br>Nuts: $112.3 \pm 10.41$<br>Refined grains: $112.1 \pm 12.05$<br><br>DBP (mmHg)<br>Nuts: $69.2 \pm 6.02$<br>Refined grains: $69.2 \pm 4.93$<br><br>FG (mmol/l)<br>Nuts: $5.90 \pm 0.55$<br>Refined grains: $5.90 \pm 0.55$<br><br>HbA1c (%) | American<br>Pistachio<br>Growers |

Online Supporting Material

|                   |                                    |                                 |    |    |      |    |     |   |                                        |                                            |    |    |                                                                                                                                                                                                                                                                                                                                                                                                                                                                                                                                                                                                                                                                                                                                                                     |                         |
|-------------------|------------------------------------|---------------------------------|----|----|------|----|-----|---|----------------------------------------|--------------------------------------------|----|----|---------------------------------------------------------------------------------------------------------------------------------------------------------------------------------------------------------------------------------------------------------------------------------------------------------------------------------------------------------------------------------------------------------------------------------------------------------------------------------------------------------------------------------------------------------------------------------------------------------------------------------------------------------------------------------------------------------------------------------------------------------------------|-------------------------|
|                   |                                    |                                 |    |    |      |    |     |   |                                        |                                            |    |    | Nuts: 6.00 ±0.55<br>Refined grains: 6.10 ±0.55<br><br>HOMA-IR<br>Nuts: 11.60 ±0.55<br>Refined grains: 1.70 ±0.55                                                                                                                                                                                                                                                                                                                                                                                                                                                                                                                                                                                                                                                    |                         |
| Shimabukuro, 2014 | Japan, RCT, crossover (no washout) | Whole grains vs. Refined grains | 27 | NR | 26.7 | 0% | 0%  | 8 | Whole grains: Brown rice               | Refined grains: White rice                 | NR | NR | TC (mmol/l)<br>Whole grains: 5.43±0.48<br>Refined grains: 5.47±0.69<br><br>LDL-C (mmol/l)<br>Whole grains: 3.28±0.49<br>Refined grains: 3.30±0.52<br><br>HDL-C (mmol/l)<br>Whole grains: 1.29±0.21<br>Refined grains: 1.35±0.25<br><br>TG (mmol/l)<br>Whole grains: 1.56±0.59<br>Refined grains: 1.70±0.61<br><br>CRP (mg/l)<br>Whole grains: 1.20±0.89<br>Refined grains: 1.52±1.37<br><br>SBP (mmHg)<br>Whole grains: 133±11.81<br>Refined grains: 139.5±18.40<br><br>DBP (mmHg)<br>Whole grains: 87±8.43<br>Refined grains: 88.5±10.47<br><br>FG (mmol/l)<br>Whole grains: 6.1±1.72<br>Refined grains: 6.34±1.91<br><br>HbA1c (%)<br>Whole grains: 5.95±1.13<br>Refined grains: 5.87±1.47<br><br>HOMA-IR<br>Whole grains: 2.28±1.37<br>Refined grains: 3.15±5.62 | No conflict of interest |
| Thongoun, 2014    | Thailand, RCT,                     | Whole grains vs. Refined        | 24 | 51 | 26.8 | 0% | 92% | 4 | Whole grains: 100% whole grain oatmeal | Refined grains: White rice flakes (70 g/d) | NR | NR | TC (mmol/l)<br>Whole grains: 5.93 ±0.60<br>Refined grains: 6.37±0.76                                                                                                                                                                                                                                                                                                                                                                                                                                                                                                                                                                                                                                                                                                | No conflict of interest |

Online Supporting Material

|                                        |                                                          |                                          |     |               |           |    |     |    |                                                                                                                                                                                       |                                                       |    |    |                                                                                                                                                                                                                                                                                                                                                                                                                                                                        |                                                        |
|----------------------------------------|----------------------------------------------------------|------------------------------------------|-----|---------------|-----------|----|-----|----|---------------------------------------------------------------------------------------------------------------------------------------------------------------------------------------|-------------------------------------------------------|----|----|------------------------------------------------------------------------------------------------------------------------------------------------------------------------------------------------------------------------------------------------------------------------------------------------------------------------------------------------------------------------------------------------------------------------------------------------------------------------|--------------------------------------------------------|
|                                        | crossover<br>(washout: 1<br>wk)                          | grains                                   |     |               |           |    |     |    | (70 g/d)                                                                                                                                                                              |                                                       |    |    | LDL-C (mmol/l)<br>Whole grains: 4.04±0.60<br>Refined grains: 4.39±0.82<br><br>HDL-C (mmol/l)<br>Whole grains: 1.50±0.32<br>Refined grains: 1.52±0.33<br><br>TG (mmol/l)<br>Whole grains: 1.08 ±0.32<br>Refined grains: 2.37±0.77                                                                                                                                                                                                                                       |                                                        |
| Tighe,<br>2010                         | UK,<br><br>RCT,<br>parallel                              | Whole<br>grains vs.<br>Refined<br>grains | 226 | 51.9          | 27.7      | 0% | 45% | 12 | Whole grains:<br>Whole-wheat<br>foods (70–80 g/d<br>whole-meal<br>bread + 30–40<br>g/d whole-grain<br>cereals) or with 1<br>serving of whole<br>wheat foods and<br>2 servings of oats | Refined grains:<br>Refined cereals<br>and white bread | NR | 9% | TC (mmol/l)<br>Whole grains: 5.59 ±0.87<br>Refined grains: 5.75±0.87<br><br>LDL-C (mmol/l)<br>Whole grains: 3.42±0.85<br>Refined grains: 3.50±0.87<br><br>HDL-C (mmol/l)<br>Whole grains: 1.62±0.40<br>Refined grains: 1.60±0.40<br><br>TG (mmol/l)<br>Whole grains: 1.21±0.55<br>Refined grains: 1.45±0.55<br><br>FG (mmol/l)<br>Whole grains: 5.44±0.55<br>Refined grains: 5.70±0.63<br><br>HOMA-IR (mmol/l)<br>Whole grains: 1.85±1.94<br>Refined grains: 2.29±1.83 | Oat cakes were<br>provided by<br>Paterson Arran<br>Ltd |
| Tucker,<br>2010<br><br>MacKay,<br>2012 | Canada,<br><br>RCT,<br>crossover<br>(washout: 4-5<br>wk) | Whole<br>grains vs.<br>Refined<br>grains | 27  | 53.1-<br>57.4 | 26.5-35.7 | 0% | 29% | 6  | Whole grains:<br>Consisted<br>predominantly of<br>whole grain<br>wheat flour (37%<br>dry weight) and<br>also contained<br>other ingredients                                           | Refined grains:<br>White bread                        | NR | 4% | TC (mmol/l)<br>Whole grains: 5.12 ±0.87<br>Refined grains: 5.04±0.92<br><br>LDL-C (mmol/l)<br>Whole grains: 3.20 ±1.05<br>Refined grains: 3.15±0.84<br><br>HDL-C (mmol/l)<br>Whole grains: 1.19±0.39<br>Refined grains: 1.19 ±0.35<br><br>TG (mmol/l)                                                                                                                                                                                                                  | Stonemill<br>Bakehouse Ltd                             |

Online Supporting Material

|                                  |                                                |                                 |    |      |      |    |     |   |                                                                                             |                                                                              |    |     |                                                                                                                                                                                                                                                                                                                                                                                                                                            |                                                           |
|----------------------------------|------------------------------------------------|---------------------------------|----|------|------|----|-----|---|---------------------------------------------------------------------------------------------|------------------------------------------------------------------------------|----|-----|--------------------------------------------------------------------------------------------------------------------------------------------------------------------------------------------------------------------------------------------------------------------------------------------------------------------------------------------------------------------------------------------------------------------------------------------|-----------------------------------------------------------|
|                                  |                                                |                                 |    |      |      |    |     |   |                                                                                             |                                                                              |    |     | Whole grains: 1.48 ±0.83<br>Refined grains: 1.39 ±0.72<br><br>FG (mmol/l)<br>Whole grains: 4.88 ±0.40<br>Refined grains: 4.91 ±0.49<br><br>HOMA-IR<br>Whole grains: 1.98 ±0.85<br>Refined grains: 1.89 ±0.85                                                                                                                                                                                                                               |                                                           |
| Turner, 2015<br><br>Turner, 2017 | AUS,<br><br>RCT, crossover (washout: 2 wk)     | Dairy vs. Red meat              | 47 | 47.8 | 31.1 | 0% | 62% | 4 | Dairy: 4–6 servings of primarily low-fat dairy (from milk, yogurt, or custard) and cheese/d | Red meat: ≥200 g red meat/d for 6 d/wk                                       | NR | 29% | TC (mmol/l)<br>Dairy: 5.63±1.10<br>Red meat: 5.61±1.10<br><br>LDL-C (mmol/l)<br>Dairy: 3.54±0.92<br>Red meat: 3.56±0.94<br><br>HDL-C (mmol/l)<br>Dairy: 1.49±0.43<br>Red meat: 1.51±0.43<br><br>TG (mmol/l)<br>Dairy: 1.29±0.66<br>Red meat: 1.20±0.65<br><br>CRP (mg/l)<br>Dairy: 5.30±8.10<br>Red meat: 5.25±7.95<br><br>FG (mmol/l)<br>Dairy: 5.23±0.60<br>Red meat: 5.24±0.60<br><br>HOMA-IR<br>Dairy: 1.55±1.0<br>Red meat: 1.30±0.70 | No conflict of interest                                   |
| Turpeinen, 2000                  | Finland,<br><br>RCT, crossover (washout: 4 wk) | Whole grains vs. Refined grains | 40 | 43   | 24.7 | 0% | 55% | 4 | Whole grains: Whole-meal rye bread (20% of daily energy intake)                             | Refined grains: Low-dietary-fiber wheat bread (20% of daily energy intake)   | NR | 7%  | TG (mmol/l)<br>Whole grains: 1.20±0.63<br>Refined grains: 1.10±0.63                                                                                                                                                                                                                                                                                                                                                                        | Fazer Bakeries Ltd, Lahti<br>Finland; Vaasan & Vaasan Ltd |
| Vitaglione, 2015                 | Italy,<br><br>RCT, parallel                    | Whole grains vs. Refined grains | 80 | 38.5 | 29.8 | 0% | NR  | 8 | Whole grains: 70 g/d (3 biscuits/d) of whole grains product                                 | Refined grains: 1 package (33 g/d) of crackers and 3 slices of toasted bread | NR | 15% | TC (mmol/l)<br>Whole grains: 4.58 ±1.08<br>Refined grains: 4.72±0.68<br><br>HDL-C (mmol/l)                                                                                                                                                                                                                                                                                                                                                 | General Mills<br>Bell Institute of Health and Nutrition   |

Online Supporting Material

|               |                                                  |                 |    |      |      |    |     |   |                                          |                        |    |     |                                                                                                                                                                                                                                                                                                                                                                                                                                                                                 |                           |
|---------------|--------------------------------------------------|-----------------|----|------|------|----|-----|---|------------------------------------------|------------------------|----|-----|---------------------------------------------------------------------------------------------------------------------------------------------------------------------------------------------------------------------------------------------------------------------------------------------------------------------------------------------------------------------------------------------------------------------------------------------------------------------------------|---------------------------|
|               |                                                  |                 |    |      |      |    |     |   |                                          | (~27 g)/d              |    |     | Whole grains: 1.26±0.36<br>Refined grains: 1.28±0.28<br><br>TG (mmol/l)<br>Whole grains: 1.12 ±0.66<br>Refined grains: 0.99±0.45<br><br>FG (mmol/l)<br>Whole grains: 5.55±0.73<br>Refined grains: 5.24±0.57                                                                                                                                                                                                                                                                     |                           |
| Winham, 2007a | USA,<br><br>RCT,<br>crossover<br>(washout: 2 wk) | Legumes vs. F&V | 23 | 45.9 | 27.4 | 0% | 57% | 8 | Legumes:<br>Baked beans                  | F&V:<br>Canned carrots | NR | 21% | TC (mmol/l)<br>Legumes: 5.26±0.62<br>F&V: 5.52±0.62<br><br>LDL-C (mmol/l)<br>Legumes: 3.29±0.48<br>F&V: 3.42±0.62<br><br>HDL-C (mmol/l)<br>Legumes: 1.45±0.37<br>F&V: 1.45±0.37<br><br>TG (mmol/l)<br>Legumes: 1.37±0.54<br>F&V: 1.69±0.87<br><br>CRP (mg/l)<br>Legumes: 2.50±2.40<br>F&V: 2.50±2.88<br><br>FG (mmol/l)<br>Legumes: 5.50±0.53<br>F&V: 5.78±0.53<br><br>HbA1c (%)<br>Legumes: 5.60±0.38<br>F&V: 5.50±0.38<br><br>HOMA-IR<br>Legumes: 5.10±2.40<br>F&V: 5.40±2.87 | Bush Brothers & Company   |
| Winham, 2007b | USA,<br><br>RCT,<br>crossover<br>(washout: 2 wk) | Legumes vs. F&V | 16 | 43   | 27.8 | 0% | 56% | 8 | Legumes:<br>Pinto beans & black eyed pea | F&V:<br>Canned carrots | NR | 30% | TC (mmol/l)<br>Legumes: 5.26±0.72<br>F&V: 5.39±0.73<br><br>LDL-C (mmol/l)<br>Legumes: 3.32±0.62<br>F&V: 3.42±0.73                                                                                                                                                                                                                                                                                                                                                               | Beans for Health Alliance |

Online Supporting Material

|                 |                                               |                                 |     |           |      |     |     |    |                                                                       |                                                    |            |    |                                                                                                                                                                                                                                                                                                                                                                                                 |                                                                |
|-----------------|-----------------------------------------------|---------------------------------|-----|-----------|------|-----|-----|----|-----------------------------------------------------------------------|----------------------------------------------------|------------|----|-------------------------------------------------------------------------------------------------------------------------------------------------------------------------------------------------------------------------------------------------------------------------------------------------------------------------------------------------------------------------------------------------|----------------------------------------------------------------|
|                 |                                               |                                 |     |           |      |     |     |    |                                                                       |                                                    |            |    | <p>HDL-C (mmol/l)<br/>Legumes: 1.32±0.31<br/>F&amp;V: 1.32±0.21</p> <p>TG (mmol/l)<br/>Legumes: 1.59±0.71<br/>F&amp;V: 1.73±0.68</p> <p>CRP (mg/l)<br/>Legumes: 2.95±2.77<br/>F&amp;V: 3.70±3.60</p> <p>FG (mmol/l)<br/>Legumes: 5.33±0.77<br/>F&amp;V: 5.56±0.44</p> <p>HbA1c (%)<br/>Legumes: 5.55±0.32<br/>F&amp;V: 5.5±0.32</p> <p>HOMA-IR<br/>Legumes: 5.05±2.31<br/>F&amp;V: 5.6±2.16</p> |                                                                |
| Wolmarans, 1991 | South Africa, RCT, crossover (washout: 12 wk) | Fish vs. Red meat               | 28  | 29.9-35.8 | <30  | 0%  | 57% | 6  | Fish: Fatty fish, canned pilchards, sardines, salmon, and fresh snook | Red meat: Beef, mutton                             | NR         | NR | <p>LDL-C (mmol/l)<br/>Fish: 3.06±0.76<br/>Red meat: 3.36±0.85</p> <p>HDL-C (mmol/l)<br/>Fish: 1.77±0.36<br/>Red meat: 1.71±0.37</p> <p>TG (mmol/l)<br/>Fish: 0.73±0.81<br/>Red meat: 0.94±0.81</p>                                                                                                                                                                                              | Irvin and Johnson, Ltd. supplied the red-meat and fish rations |
| Zhang, 2011     | China, RCT, parallel                          | Whole grains vs. Refined grains | 202 | 49.7      | 25.7 | 23% | 47% | 16 | Whole grains: 225 g/d servings cooked brown rice                      | Refined grains: 225 g/d servings cooked white rice | Ad libitum | 4% | <p>TC (mmol/l)<br/>Whole grains: -0.1 ±1.16<br/>Refined grains: -0.4±1.11</p> <p>LDL-C (mmol/l)<br/>Whole grains: -0.03±0.91<br/>Refined grains: -0.33±0.96</p> <p>HDL-C (mmol/l)<br/>Whole grains: -0.03±0.25<br/>Refined grains: -0.12±0.30</p> <p>TG (mmol/l)</p>                                                                                                                            | No conflict of interest                                        |

Online Supporting Material

|             |                      |                                 |     |      |      |    |     |   |                                                                                                                                                                                                                                                                                      |                                                                                                                                                                                                                                                                  |    |     |                                                                                                                                                                                                                                                                                                                                                                                                                                                                                                                                                                                                                                                                                                                                                                                                                                                                                                                                                                                               |                      |
|-------------|----------------------|---------------------------------|-----|------|------|----|-----|---|--------------------------------------------------------------------------------------------------------------------------------------------------------------------------------------------------------------------------------------------------------------------------------------|------------------------------------------------------------------------------------------------------------------------------------------------------------------------------------------------------------------------------------------------------------------|----|-----|-----------------------------------------------------------------------------------------------------------------------------------------------------------------------------------------------------------------------------------------------------------------------------------------------------------------------------------------------------------------------------------------------------------------------------------------------------------------------------------------------------------------------------------------------------------------------------------------------------------------------------------------------------------------------------------------------------------------------------------------------------------------------------------------------------------------------------------------------------------------------------------------------------------------------------------------------------------------------------------------------|----------------------|
|             |                      |                                 |     |      |      |    |     |   |                                                                                                                                                                                                                                                                                      |                                                                                                                                                                                                                                                                  |    |     | <p>Whole grains: <math>-0.16 \pm 0.86</math><br/>                 Refined grains: <math>-0.04 \pm 0.71</math></p> <p>SBP (mmHg)<br/>                 Whole grains: <math>-5.39 \pm 10.64</math><br/>                 Refined grains: <math>-4.78 \pm 10.64</math></p> <p>DBP (mmHg)<br/>                 Whole grains: <math>-3.92 \pm 6.70</math><br/>                 Refined grains: <math>-3.82 \pm 6.64</math></p> <p>FG (mmol/l)<br/>                 Whole grains: <math>-0.01 \pm 1.11</math><br/>                 Refined grains: <math>-0.16 \pm 1.47</math></p> <p>HbA1c (%)<br/>                 Whole grains: <math>0.13 \pm 0.51</math><br/>                 Refined grains: <math>0.20 \pm 0.81</math></p> <p>HOMA-IR<br/>                 Whole grains: <math>0.03 \pm 0.96</math><br/>                 Refined grains: <math>0.07 \pm 1.92</math></p>                                                                                                                        |                      |
| Zhang, 2012 | China, RCT, parallel | Whole grains vs. Refined grains | 166 | 53.2 | 25.5 | 0% | 61% | 6 | <p>Whole grains: Replacing a portion of a staple food product (rice, steamed bread, noodles) with the whole grain oats product. Participants receiving the oatmeal were instructed to prepare 1/2 a package (~100 g/d dry weight, providing approximately 3.6 g/d soluble fiber)</p> | <p>Refined grains: Wheat noodles ("Shengchu" brand processed wheat flour based noodles) were purchased in 450g packages at the local grocery store and distributed to participants on a wk basis. Participants were instructed to prepare and consume 100g/d</p> | NR | 10% | <p>TC (mmol/l)<br/>                 Whole grains: <math>5.85 \pm 0.78</math><br/>                 Refined grains: <math>5.94 \pm 0.78</math></p> <p>LDL-C (mmol/l)<br/>                 Whole grains: <math>3.91 \pm 0.75</math><br/>                 Refined grains: <math>4.00 \pm 0.75</math></p> <p>HDL-C (mmol/l)<br/>                 Whole grains: <math>1.43 \pm 0.30</math><br/>                 Refined grains: <math>1.41 \pm 0.30</math></p> <p>TG (mmol/l)<br/>                 Whole grains: <math>1.91 \pm 0.99</math><br/>                 Refined grains: <math>1.85 \pm 0.99</math></p> <p>SBP (mmHg)<br/>                 Whole grains: <math>125.7 \pm 15.21</math><br/>                 Refined grains: <math>129.9 \pm 15.21</math></p> <p>DBP (mmHg)<br/>                 Whole grains: <math>80.1 \pm 8.94</math><br/>                 Refined grains: <math>80.4 \pm 9.0</math></p> <p>FG (mmol/l)<br/>                 Whole grains: <math>5.34 \pm 0.81</math></p> | Pepsi Co china Foods |





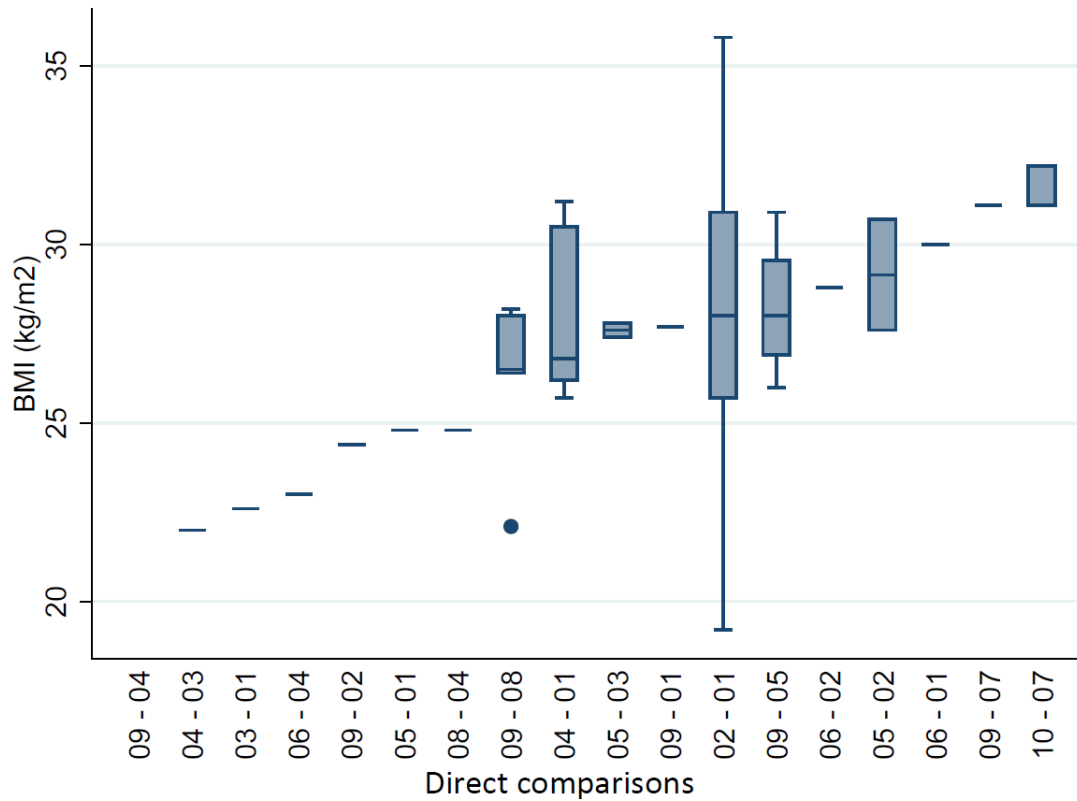

Supplemental Figure 3: Box plots showing the distribution of the mean BMI of the trials across the available direct comparisons. For the comparison red meat vs. nuts, BMI was not reported across the included trials.

[01=Refined grains, 02=Whole grains, 03=Fruit and Vegetables, 04=Nuts, 05=Legumes, 06=Eggs, 07=Dairy, 08=Fish, 09=Red meat, 10=SSB].

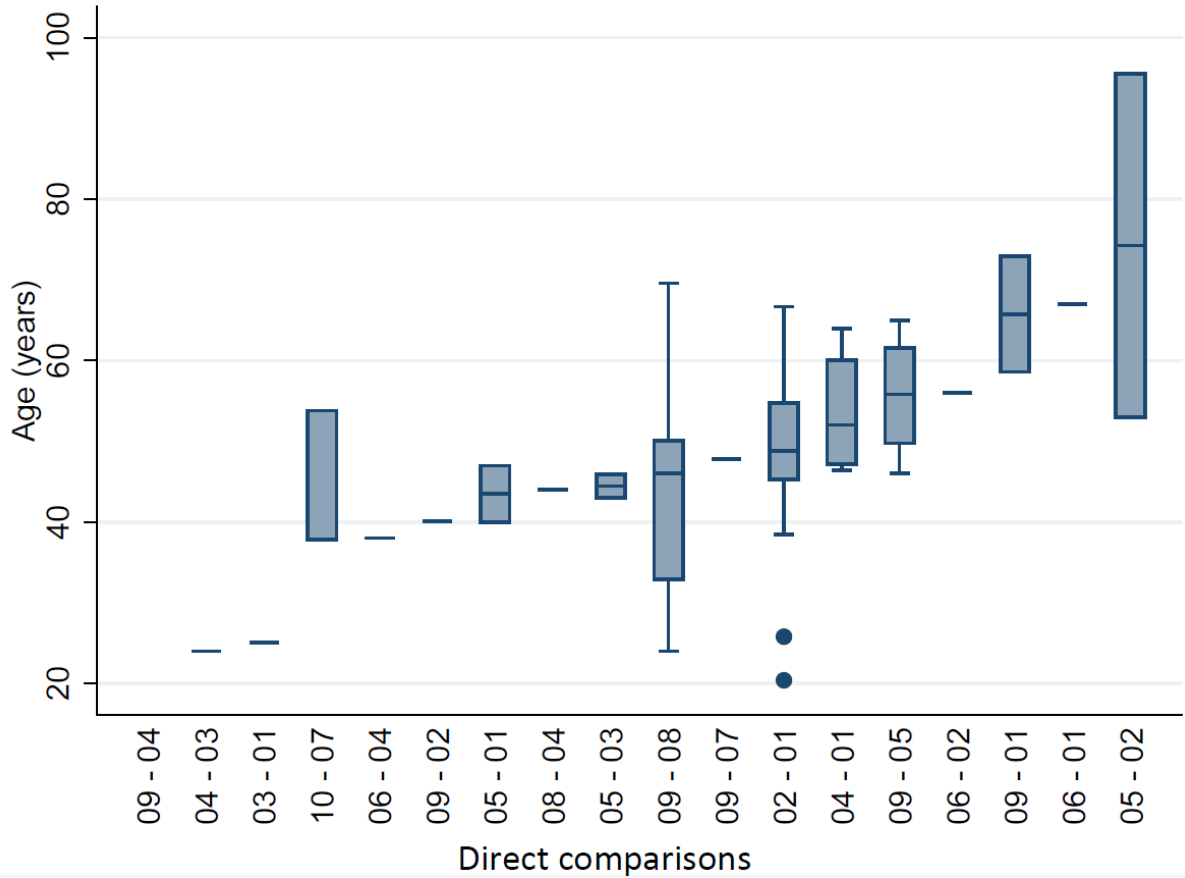

Supplemental Figure 4: Box plots showing the distribution of the mean age of the trials across the available direct comparisons. For the comparison red meat vs. nuts, age was not reported across the included trials.

[01=Refined grains, 02=Whole grains, 03=Fruit and Vegetables, 04=Nuts, 05=Legumes, 06=Eggs, 07=Dairy, 08=Fish, 09=Red meat, 10=SSB].

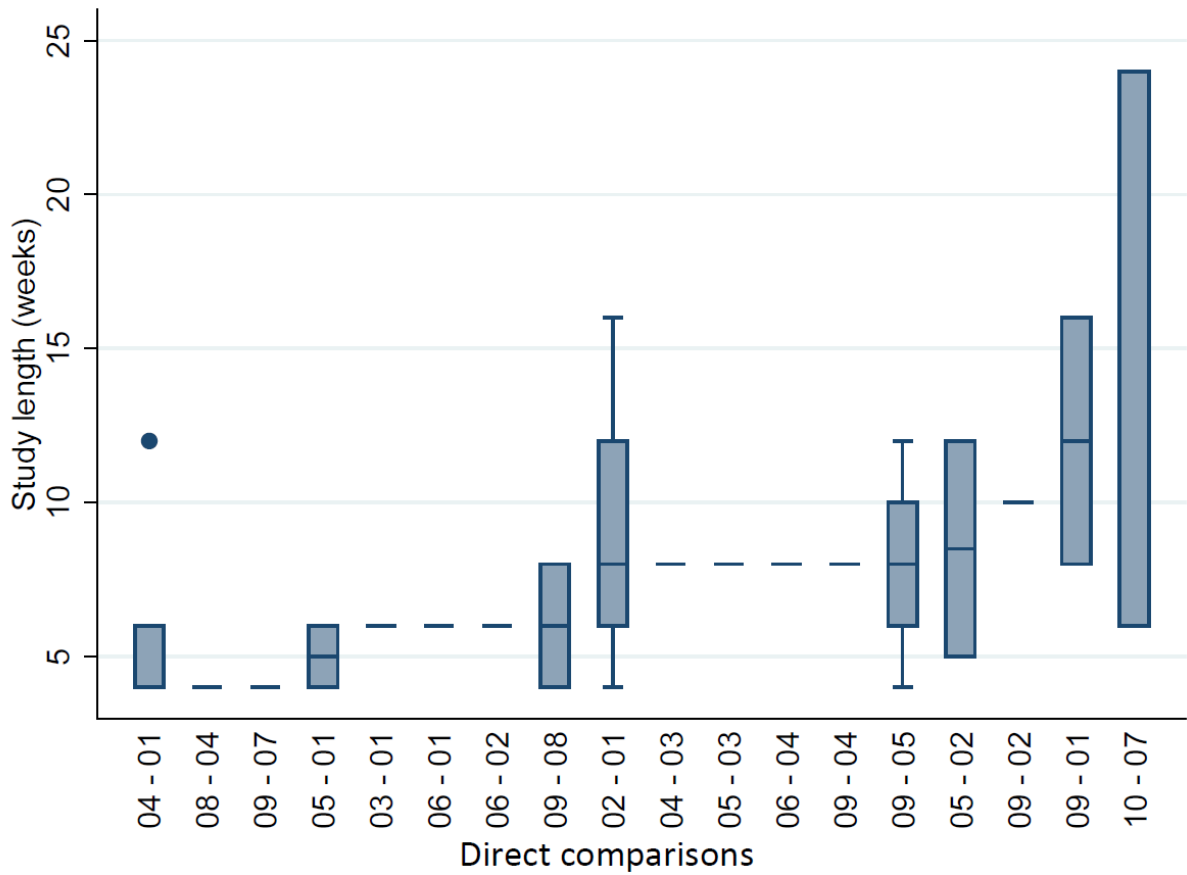

Supplemental Figure 5: Box plots showing the distribution of the mean study length (weeks) of the trials across the available direct comparisons.

[01=Refined grains, 02=Whole grains, 03=Fruit and Vegetables, 04=Nuts, 05=Legumes, 06=Eggs, 07=Dairy, 08=Fish, 09=Red meat, 10=SSB].

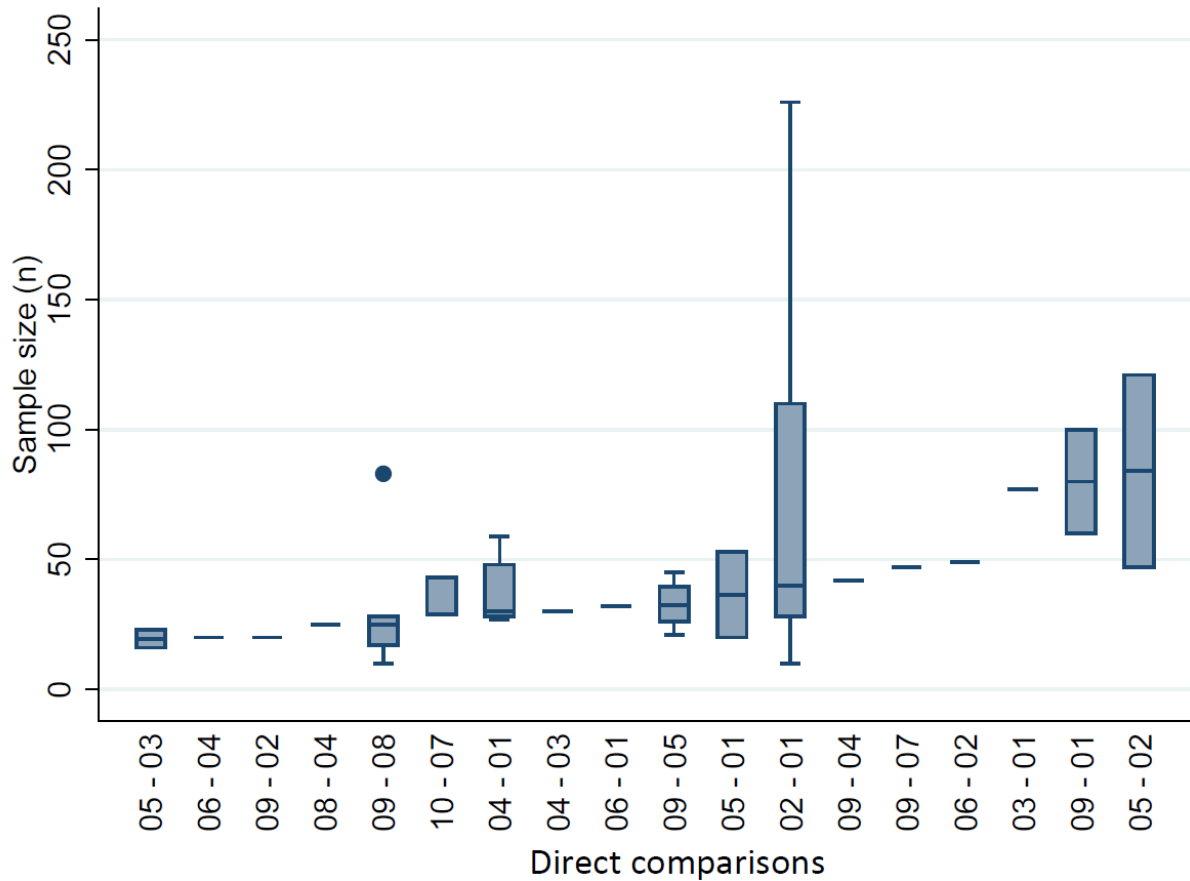

Supplemental Figure 6: Box plots showing the distribution of the sample size of the trials across the available direct comparisons.

[01=Refined grains, 02=Whole grains, 03=Fruit and Vegetables, 04=Nuts, 05=Legumes, 06=Eggs, 07=Dairy, 08=Fish, 09=Red meat, 10=SSB].

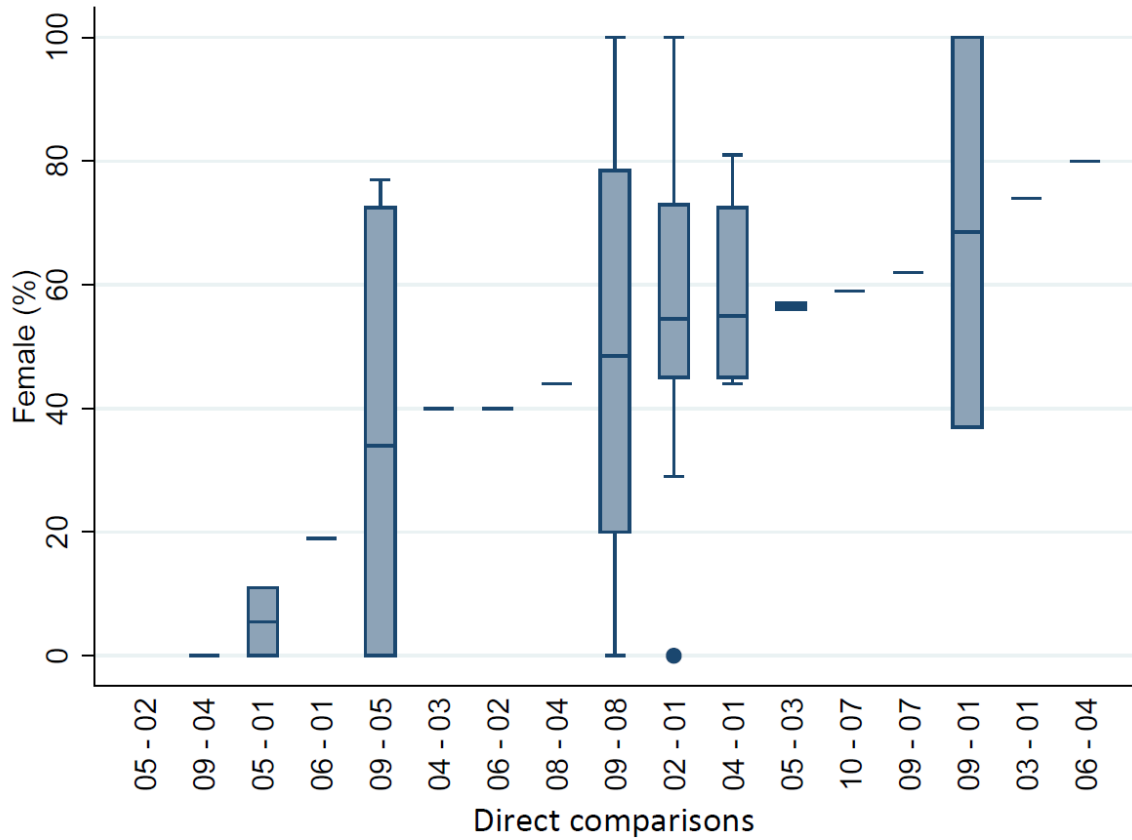

Supplemental Figure 7: Box plots showing the distribution of the % female participants in the trials across the available direct comparisons. For the comparison legumes vs. whole grains, % female was not reported across the included trials.

[01=Refined grains, 02=Whole grains, 03=Fruit and Vegetables, 04=Nuts, 05=Legumes, 06=Eggs, 07=Dairy, 08=Fish, 09=Red meat, 10=SSB].

Supplemental Table 3: Percentage contribution of each direct estimate derived from direct and indirect comparisons<sup>1</sup>

| LDL-C |     |         |     |              |     |                |     |                      |     |      |     |       |     |      |     |          |     |     |     |
|-------|-----|---------|-----|--------------|-----|----------------|-----|----------------------|-----|------|-----|-------|-----|------|-----|----------|-----|-----|-----|
| Nuts  | 0   | 100     | 0   | 100          | 75  | 25             | 23  | 77                   | 55  | 45   | 0   | 100   | 17  | 83   | 34  | 66       | 0   | 100 |     |
| 0     | 100 | Legumes |     | 39           | 61  | 12             | 88  | 51                   | 49  | 0    | 100 | 0     | 100 | 0    | 100 | 61       | 39  | 0   | 100 |
| 0     | 100 | 27      | 73  | Whole grains |     | 96             | 4   | 0                    | 100 | 29   | 71  | 0     | 100 | 0    | 100 | 0        | 100 | 0   | 100 |
| 44    | 56  | 29      | 71  | 96           | 4   | Refined grains |     | 48                   | 52  | 26   | 74  | 0     | 100 | 0    | 100 | 42       | 58  | 0   | 100 |
| 31    | 69  | 26      | 74  | 0            | 100 | 63             | 37  | Fruit and Vegetables |     | 0    | 100 | 0     | 100 | 0    | 100 | 0        | 100 | 0   | 100 |
| 64    | 36  | 0       | 100 | 14           | 86  | 39             | 61  | 0                    | 100 | Eggs |     | 0     | 100 | 0    | 100 | 0        | 100 | 0   | 100 |
| 0     | 100 | 0       | 100 | 0            | 100 | 0              | 100 | 0                    | 100 | 0    | 100 | Dairy |     | 0    | 100 | 100      | 0   | 100 | 0   |
| 3     | 97  | 0       | 100 | 0            | 100 | 0              | 100 | 0                    | 100 | 0    | 100 | 0     | 100 | Fish |     | 94       | 6   | 0   | 100 |
| 91    | 9   | 49      | 51  | 3            | 97  | 21             | 79  | 0                    | 100 | 0    | 100 | 100   | 0   | 99   | 1   | Red meat |     | 0   | 100 |
| 0     | 100 | 0       | 100 | 0            | 100 | 0              | 100 | 0                    | 100 | 0    | 100 | 100   | 0   | 0    | 100 | 0        | 100 | SSB |     |
| TG    |     |         |     |              |     |                |     |                      |     |      |     |       |     |      |     |          |     |     |     |

<sup>1</sup>Direct comparisons are depicted in blue and indirect comparisons in red (the color corresponds to the percentage of contribution). The values above the food groups correspond to the percentage contribution of direct and indirect comparisons between the row and columns for LDL-cholesterol (e.g., the percentage contribution of direct comparisons for LDL-C between Nuts and Eggs is 55% and for the indirect comparisons 45%). The values below the food groups correspond to the percentage contribution of direct and indirect comparisons between the column and the rows for triacylglycerol (e.g., the percentage contribution of direct comparisons for triacylglycerol between Nuts and Eggs is 64% and for the indirect comparisons 36%).

Supplemental Table 4: League table for total cholesterol (mmol/l)

|                                       |                                       |                                       |                        |                        |                        |                        |                        |                        |     |
|---------------------------------------|---------------------------------------|---------------------------------------|------------------------|------------------------|------------------------|------------------------|------------------------|------------------------|-----|
| Nuts                                  |                                       |                                       |                        |                        |                        |                        |                        |                        |     |
| -0.00 <sup>1</sup><br>(-0.18, 0.18)   | Legumes                               |                                       |                        |                        |                        |                        |                        |                        |     |
| -0.14<br>(-0.28, -0.00)               | -0.14<br>(-0.30, 0.03)                | Whole grains                          |                        |                        |                        |                        |                        |                        |     |
| <b>-0.30</b><br><b>(-0.42, -0.17)</b> | <b>-0.29</b><br><b>(-0.45, -0.13)</b> | <b>-0.16</b><br><b>(-0.22, -0.09)</b> | Refined grains         |                        |                        |                        |                        |                        |     |
| -0.20<br>(-0.44, 0.04)                | -0.20<br>(-0.43, 0.03)                | -0.06<br>(-0.30, 0.17)                | 0.09<br>(-0.13, 0.32)  | Fruit and Vegetables   |                        |                        |                        |                        |     |
| <b>-0.36</b><br><b>(-0.56, -0.15)</b> | <b>-0.35</b><br><b>(-0.61, -0.10)</b> | -0.22<br>(-0.43, -0.00)               | -0.06<br>(-0.27, 0.15) | -0.15<br>(-0.45, 0.15) | Eggs                   |                        |                        |                        |     |
| -0.38<br>(-0.88, 0.12)                | -0.38<br>(-0.89, 0.13)                | -0.24<br>(-0.75, 0.27)                | -0.08<br>(-0.59, 0.42) | -0.18<br>(-0.72, 0.37) | -0.02<br>(-0.56, 0.51) | Dairy                  |                        |                        |     |
| <b>-0.39</b><br><b>(-0.59, -0.18)</b> | <b>-0.39</b><br><b>(-0.62, -0.16)</b> | <b>-0.25</b><br><b>(-0.47, -0.03)</b> | -0.09<br>(-0.30, 0.12) | -0.19<br>(-0.48, 0.11) | -0.03<br>(-0.31, 0.25) | -0.01<br>(-0.51, 0.50) | Fish                   |                        |     |
| <b>-0.36</b><br><b>(-0.51, -0.21)</b> | <b>-0.36</b><br><b>(-0.54, -0.18)</b> | <b>-0.22</b><br><b>(-0.39, -0.06)</b> | -0.06<br>(-0.22, 0.09) | -0.16<br>(-0.41, 0.10) | -0.00<br>(-0.25, 0.24) | 0.02<br>(-0.46, 0.50)  | 0.03<br>(-0.13, 0.19)  | Red meat               |     |
| -0.41<br>(-1.06, 0.25)                | -0.40<br>(-1.06, 0.26)                | -0.27<br>(-0.92, 0.39)                | -0.11<br>(-0.76, 0.54) | -0.20<br>(-0.89, 0.48) | -0.05<br>(-0.73, 0.63) | -0.03<br>(-0.44, 0.39) | -0.02<br>(-0.67, 0.64) | -0.05<br>(-0.68, 0.59) | SSB |

<sup>1</sup> The value below the food groups correspond to the difference in mean in total cholesterol (mmol/l) between the column and the row.

Supplemental Table 5: League table for HDL-cholesterol (mmol/l)

|                                                |                                       |                        |                        |                        |                        |                        |                       |                       |     |
|------------------------------------------------|---------------------------------------|------------------------|------------------------|------------------------|------------------------|------------------------|-----------------------|-----------------------|-----|
| Nuts                                           |                                       |                        |                        |                        |                        |                        |                       |                       |     |
| <b>0.08<sup>1</sup></b><br><b>(0.01, 0.15)</b> | Legumes                               |                        |                        |                        |                        |                        |                       |                       |     |
| 0.02<br>(-0.04, 0.07)                          | -0.06<br>(-0.13, -0.00)               | Whole grains           |                        |                        |                        |                        |                       |                       |     |
| 0.01<br>(-0.04, 0.07)                          | -0.07<br>(-0.13, -0.00)               | -0.00<br>(-0.03, 0.02) | Refined grains         |                        |                        |                        |                       |                       |     |
| 0.03<br>(-0.07, 0.13)                          | -0.05<br>(-0.15, 0.04)                | 0.01<br>(-0.08, 0.10)  | 0.01<br>(-0.08, 0.10)  | Fruit and Vegetables   |                        |                        |                       |                       |     |
| 0.00<br>(-0.10, 0.10)                          | -0.08<br>(-0.19, 0.04)                | -0.01<br>(-0.11, 0.09) | -0.01<br>(-0.11, 0.09) | -0.03<br>(-0.16, 0.11) | Eggs                   |                        |                       |                       |     |
| 0.03<br>(-0.17, 0.22)                          | -0.05<br>(-0.25, 0.14)                | 0.01<br>(-0.19, 0.21)  | 0.01<br>(-0.19, 0.21)  | -0.00<br>(-0.22, 0.21) | 0.02<br>(-0.19, 0.24)  | Dairy                  |                       |                       |     |
| -0.06<br>(-0.13, 0.02)                         | <b>-0.13</b><br><b>(-0.22, -0.05)</b> | -0.07<br>(-0.15, 0.01) | -0.07<br>(-0.15, 0.01) | -0.08<br>(-0.20, 0.03) | -0.06<br>(-0.18, 0.06) | -0.08<br>(-0.28, 0.12) | Fish                  |                       |     |
| 0.01<br>(-0.05, 0.06)                          | <b>-0.07</b><br><b>(-0.13, -0.01)</b> | -0.01<br>(-0.07, 0.05) | -0.01<br>(-0.06, 0.05) | -0.02<br>(-0.12, 0.08) | 0.00<br>(-0.10, 0.11)  | -0.02<br>(-0.21, 0.17) | 0.06<br>(-0.00, 0.12) | Red meat              |     |
| 0.07<br>(-0.16, 0.31)                          | -0.00<br>(-0.24, 0.23)                | 0.06<br>(-0.18, 0.30)  | 0.06<br>(-0.18, 0.30)  | 0.05<br>(-0.20, 0.30)  | 0.07<br>(-0.18, 0.33)  | 0.05<br>(-0.08, 0.18)  | 0.13<br>(-0.11, 0.37) | 0.07<br>(-0.16, 0.30) | SSB |

<sup>1</sup> The value below the food groups correspond to the difference in mean in HDL-cholesterol (mmol/l) between the column and the row.



Supplemental Table 6: League table for fasting glucose (mmol/l)

|                                       |                        |                                       |                                       |                        |                        |                        |     |
|---------------------------------------|------------------------|---------------------------------------|---------------------------------------|------------------------|------------------------|------------------------|-----|
| Nuts                                  |                        |                                       |                                       |                        |                        |                        |     |
| -0.19 <sup>1</sup><br>(-0.42, 0.05)   | Legumes                |                                       |                                       |                        |                        |                        |     |
| 0.00<br>(-0.20, 0.20)                 | 0.19<br>(-0.01, 0.39)  | Whole grains                          |                                       |                        |                        |                        |     |
| -0.04<br>(-0.22, 0.14)                | 0.15<br>(-0.05, 0.35)  | -0.04<br>(-0.14, 0.05)                | Refined grains                        |                        |                        |                        |     |
| <b>-0.43</b><br><b>(-0.70, -0.16)</b> | -0.24<br>(-0.54, 0.06) | <b>-0.43</b><br><b>(-0.73, -0.14)</b> | <b>-0.39</b><br><b>(-0.68, -0.10)</b> | Fruit and Vegetables   |                        |                        |     |
| -0.38<br>(-0.92, 0.16)                | -0.20<br>(-0.74, 0.35) | -0.38<br>(-0.93, 0.16)                | -0.34<br>(-0.88, 0.20)                | 0.05<br>(-0.54, 0.63)  | Dairy                  |                        |     |
| <b>-0.39</b><br><b>(-0.68, -0.11)</b> | -0.21<br>(-0.50, 0.09) | <b>-0.39</b><br><b>(-0.69, -0.10)</b> | <b>-0.35</b><br><b>(-0.64, -0.07)</b> | 0.04<br>(-0.33, 0.40)  | -0.01<br>(-0.47, 0.45) | Red meat               |     |
| -0.44<br>(-1.11, 0.23)                | -0.25<br>(-0.93, 0.42) | -0.44<br>(-1.12, 0.24)                | -0.40<br>(-1.07, 0.27)                | -0.01<br>(-0.72, 0.70) | -0.06<br>(-0.46, 0.35) | -0.05<br>(-0.66, 0.56) | SSB |

<sup>1</sup> The value below the food groups correspond to the difference in mean in fasting glucose (mmol/l) between the column and the row.

Supplemental Table 7: League table for HbA1c (%)

|                                     |                        |                       |                       |                        |                      |
|-------------------------------------|------------------------|-----------------------|-----------------------|------------------------|----------------------|
| Whole grains                        |                        |                       |                       |                        |                      |
| -0.02 <sup>1</sup><br>(-0.39, 0.36) | Refined grains         |                       |                       |                        |                      |
| -0.32<br>(-0.68, 0.04)              | -0.30<br>(-0.66, 0.06) | Red meat              |                       |                        |                      |
| -0.12<br>(-0.39, 0.16)              | -0.10<br>(-0.38, 0.17) | 0.20<br>(-0.03, 0.43) | Nuts                  |                        |                      |
| -0.07<br>(-0.34, 0.19)              | -0.06<br>(-0.34, 0.23) | 0.25<br>(0.00, 0.49)  | 0.05<br>(-0.02, 0.12) | Legumes                |                      |
| -0.07<br>(-0.23, 0.08)              | -0.06<br>(-0.41, 0.29) | 0.24<br>(-0.08, 0.57) | 0.04<br>(-0.18, 0.27) | -0.00<br>(-0.22, 0.22) | Fruit and Vegetables |

<sup>1</sup> The value below the food groups correspond to the difference in mean in HbA1c (%) between the column and the row.

Supplemental Table 8: League table for HOMA-IR

|                                                   |                                       |                                       |                        |                                       |                        |                       |       |
|---------------------------------------------------|---------------------------------------|---------------------------------------|------------------------|---------------------------------------|------------------------|-----------------------|-------|
| Whole grains                                      |                                       |                                       |                        |                                       |                        |                       |       |
| <b>-0.22<sup>1</sup></b><br><b>(-0.40, -0.05)</b> | Refined grains                        |                                       |                        |                                       |                        |                       |       |
| -0.15<br>(-0.49, 0.19)                            | 0.07<br>(-0.22, 0.37)                 | Nuts                                  |                        |                                       |                        |                       |       |
| -0.42<br>(-1.38, 0.54)                            | -0.19<br>(-1.14, 0.75)                | -0.27<br>(-1.17, 0.63)                | Red meat               |                                       |                        |                       |       |
| -0.06<br>(-0.58, 0.46)                            | 0.17<br>(-0.36, 0.70)                 | 0.09<br>(-0.46, 0.65)                 | 0.36<br>(-0.68, 1.40)  | Legumes                               |                        |                       |       |
| -0.48<br>(-1.69, 0.73)                            | -0.26<br>(-1.47, 0.96)                | -0.33<br>(-1.56, 0.89)                | -0.06<br>(-1.57, 1.45) | -0.42<br>(-1.52, 0.67)                | Fruit and Vegetables   |                       |       |
| <b>-1.01</b><br><b>(-1.54, -0.47)</b>             | <b>-0.78</b><br><b>(-1.29, -0.28)</b> | <b>-0.86</b><br><b>(-1.27, -0.44)</b> | -0.59<br>(-1.39, 0.21) | <b>-0.95</b><br><b>(-1.63, -0.28)</b> | -0.53<br>(-1.81, 0.76) | Eggs                  |       |
| <b>-0.76</b><br><b>(-1.14, -0.38)</b>             | <b>-0.53</b><br><b>(-0.87, -0.19)</b> | <b>-0.61</b><br><b>(-0.79, -0.43)</b> | -0.34<br>(-1.22, 0.54) | <b>-0.70</b><br><b>(-1.26, -0.14)</b> | -0.28<br>(-1.51, 0.95) | 0.25<br>(-0.13, 0.63) | Dairy |

<sup>1</sup> The value below the food groups correspond to the difference in mean in HOMA-IR between the column and the row.

Supplemental Table 9: League table for systolic blood pressure (mmHg)

|                                                   |                                     |                        |                                     |                         |                         |                         |      |
|---------------------------------------------------|-------------------------------------|------------------------|-------------------------------------|-------------------------|-------------------------|-------------------------|------|
| Whole grains                                      |                                     |                        |                                     |                         |                         |                         |      |
| <b>-1.79<sup>1</sup></b><br><b>(-3.55, -0.03)</b> | Refined grains                      |                        |                                     |                         |                         |                         |      |
| 0.51<br>(-3.67, 4.68)                             | 2.30<br>(-1.65, 6.25)               | Red Meat               |                                     |                         |                         |                         |      |
| -0.67<br>(-5.22, 3.88)                            | 1.12<br>(-3.15, 5.39)               | -1.18<br>(-5.42, 3.06) | Nuts                                |                         |                         |                         |      |
| 2.40<br>(-2.43, 7.24)                             | 4.20<br>(-0.73, 9.12)               | 1.90<br>(-3.07, 6.86)  | 3.07<br>(-2.86, 9.01)               | Legumes                 |                         |                         |      |
| 6.82<br>(-1.17, 14.81)                            | <b>8.61</b><br><b>(0.78, 16.45)</b> | 6.31<br>(-1.50, 14.13) | <b>7.49</b><br><b>(0.92, 14.06)</b> | 4.42<br>(-4.43, 13.27)  | Fruit and Vegetables    |                         |      |
| 2.50<br>(-7.72, 12.72)                            | 4.29<br>(-5.84, 14.42)              | 1.99<br>(-7.34, 11.32) | 3.17<br>(-7.08, 13.42)              | 0.10<br>(-10.47, 10.66) | -4.32<br>(-16.49, 7.85) | Fish                    |      |
| -0.18<br>(-5.22, 4.86)                            | 1.61<br>(-3.51, 6.74)               | -0.68<br>(-7.09, 5.72) | 0.49<br>(-6.15, 7.14)               | -2.58<br>(-9.49, 4.33)  | -7.00<br>(-16.34, 2.34) | -2.68<br>(-13.99, 8.64) | Eggs |

<sup>1</sup> The value below the food groups correspond to the difference in mean in systolic blood pressure (mmHg) between the column and the row.

Supplemental Table 10: League table for diastolic blood pressure (mmHg)

|                                     |                        |                        |                        |                        |                        |                       |      |
|-------------------------------------|------------------------|------------------------|------------------------|------------------------|------------------------|-----------------------|------|
| Whole grains                        |                        |                        |                        |                        |                        |                       |      |
| -0.74 <sup>1</sup><br>(-1.71, 0.23) | Refined grains         |                        |                        |                        |                        |                       |      |
| 0.75<br>(-1.68, 3.18)               | 1.49<br>(-0.80, 3.77)  | Red Meat               |                        |                        |                        |                       |      |
| -0.44<br>(-2.90, 2.02)              | 0.30<br>(-2.01, 2.60)  | -1.19<br>(-3.24, 0.86) | Nuts                   |                        |                        |                       |      |
| 0.83<br>(-2.33, 3.99)               | 1.57<br>(-1.63, 4.76)  | 0.08<br>(-3.16, 3.32)  | 1.27<br>(-2.27, 4.81)  | Legumes                |                        |                       |      |
| 0.16<br>(-5.89, 6.21)               | 0.89<br>(-5.09, 6.88)  | -0.59<br>(-6.49, 5.30) | 0.60<br>(-4.93, 6.13)  | -0.67<br>(-7.23, 5.89) | Fruit and Vegetables   |                       |      |
| -1.25<br>(-6.61, 4.11)              | -0.51<br>(-5.81, 4.79) | -2.00<br>(-6.78, 2.78) | -0.81<br>(-6.01, 4.40) | -2.08<br>(-7.85, 3.70) | -1.41<br>(-9.00, 6.18) | Fish                  |      |
| -0.55<br>(-3.20, 2.09)              | 0.18<br>(-2.47, 2.84)  | -1.30<br>(-4.78, 2.18) | -0.11<br>(-3.61, 3.39) | -1.38<br>(-5.46, 2.70) | -0.71<br>(-7.25, 5.83) | 0.70<br>(-5.22, 6.61) | Eggs |

<sup>1</sup> The value below the food groups correspond to the difference in mean in diastolic blood pressure (mmHg) between the column and the row.

Supplemental Table 11: League table for CRP (mg/l)

|                                       |                        |                        |                                    |                       |                                       |                        |                       |          |
|---------------------------------------|------------------------|------------------------|------------------------------------|-----------------------|---------------------------------------|------------------------|-----------------------|----------|
| Nuts                                  |                        |                        |                                    |                       |                                       |                        |                       |          |
| -0.50 <sup>1</sup><br>(-2.55, 1.55)   | Legumes                |                        |                                    |                       |                                       |                        |                       |          |
| -0.13<br>(-0.55, 0.29)                | 0.37<br>(-1.71, 2.44)  | Whole grains           |                                    |                       |                                       |                        |                       |          |
| <b>-0.35</b><br><b>(-0.67, -0.03)</b> | 0.15<br>(-1.91, 2.21)  | -0.22<br>(-0.51, 0.07) | Refined grains                     |                       |                                       |                        |                       |          |
| -0.99<br>(-3.19, 1.20)                | -0.50<br>(-1.71, 0.72) | -0.86<br>(-3.08, 1.35) | -0.64<br>(-2.84, 1.56)             | Fruit and Vegetables  |                                       |                        |                       |          |
| <b>0.35</b><br><b>(0.10, 0.59)</b>    | 0.84<br>(-1.22, 2.91)  | 0.48<br>(-0.00, 0.95)  | <b>0.70</b><br><b>(0.30, 1.09)</b> | 1.34<br>(-0.87, 3.55) | Eggs                                  |                        |                       |          |
| -0.33<br>(-3.58, 2.91)                | 0.17<br>(-3.67, 4.00)  | -0.20<br>(-3.47, 3.07) | 0.02<br>(-3.24, 3.28)              | 0.66<br>(-3.25, 4.58) | -0.68<br>(-3.93, 2.58)                | Dairy                  |                       |          |
| <b>-0.43</b><br><b>(-0.81, -0.05)</b> | 0.07<br>(-2.01, 2.15)  | -0.30<br>(-0.85, 0.26) | -0.08<br>(-0.56, 0.41)             | 0.57<br>(-1.65, 2.79) | <b>-0.77</b><br><b>(-1.23, -0.32)</b> | -0.09<br>(-3.36, 3.17) | Fish                  |          |
| <b>-0.28</b><br><b>(-0.42, -0.15)</b> | 0.22<br>(-1.83, 2.26)  | -0.15<br>(-0.58, 0.27) | 0.07<br>(-0.26, 0.40)              | 0.71<br>(-1.48, 2.90) | <b>-0.63</b><br><b>(-0.91, -0.35)</b> | 0.05<br>(-3.19, 3.29)  | 0.14<br>(-0.22, 0.51) | Red meat |

<sup>1</sup> The value below the food groups correspond to the difference in mean in CRP (mg/l) between the column and the row.

Supplemental Table 12: Side-splitting approach for inconsistency for LDL-cholesterol

| Side               | Direct      |                 | Indirect    |       | Difference  |       |      |
|--------------------|-------------|-----------------|-------------|-------|-------------|-------|------|
|                    | Coefficient | SE <sup>1</sup> | Coefficient | SE    | Coefficient | SE    | p    |
| 01 02              | -0.12       | 0.03            | -0.08       | 0.14  | -0.04       | 0.14  | 0.79 |
| 01 03              | -0.15       | 0.15            | -0.04       | 0.14  | -0.10       | 0.21  | 0.61 |
| 01 04              | -0.23       | 0.07            | -0.27       | 0.11  | 0.04        | 0.13  | 0.77 |
| 01 05              | -0.02       | 0.24            | -0.22       | 0.09  | 0.20        | 0.26  | 0.44 |
| 01 06              | -0.02       | 0.19            | 0.03        | 0.12  | -0.05       | 0.22  | 0.83 |
| 01 09              | 0.11        | 0.12            | 0.10        | 0.10  | 0.002       | 0.16  | 0.99 |
| 02 05              | -0.21       | 0.14            | 0.01        | 0.11  | -0.22       | 0.17  | 0.19 |
| 02 06              | 0.32        | 0.18            | 0.05        | 0.12  | 0.27        | 0.22  | 0.23 |
| 03 04              | -0.23       | 0.22            | -0.12       | 0.13  | -0.11       | 0.26  | 0.67 |
| 03 05              | -0.12       | 0.15            | -0.08       | 0.16  | -0.04       | 0.22  | 0.86 |
| 04 06              | 0.17        | 0.14            | 0.35        | 0.15  | -0.18       | 0.20  | 0.37 |
| 04 08              | 0.43        | 0.23            | 0.31        | 0.11  | 0.12        | 0.26  | 0.65 |
| 04 09              | 0.41        | 0.14            | 0.31        | 0.10  | 0.10        | 0.17  | 0.59 |
| 05 09              | 0.24        | 0.11            | 0.39        | 0.14  | -0.16       | 0.17  | 0.36 |
| 07 09 <sup>2</sup> | 0.02        | 0.21            | 0.11        | 66.72 | -0.09       | 66.7  | 0.99 |
| 07 10 <sup>2</sup> | 0.03        | 0.17            | -0.13       | 143.8 | 0.17        | 143.2 | 0.99 |
| 08 09              | 0.01        | 0.07            | -0.10       | 0.24  | 0.12        | 0.25  | 0.65 |

<sup>1</sup>standard error; <sup>2</sup>all the evidence about these contrasts comes from the trials which directly compare them.

[01=Refined grains, 02=Whole grains, 03=Fruit and Vegetables, 04=Nuts, 05=Legumes, 06=Eggs, 07=Dairy, 08=Fish, 09=Red meat, 10=SSB].

Supplemental Table 13: Side-splitting approach for inconsistency for triacylglycerol

| Side               | Direct      |                 | Indirect    |       | Difference  |       |      |
|--------------------|-------------|-----------------|-------------|-------|-------------|-------|------|
|                    | Coefficient | SE <sup>1</sup> | Coefficient | SE    | Coefficient | SE    | P    |
| 01 02              | -0.07       | 0.02            | -0.11       | 0.11  | 0.037       | 0.11  | 0.74 |
| 01 03              | -0.04       | 0.09            | -0.00       | 0.11  | -0.04       | 0.14  | 0.78 |
| 01 04              | -0.20       | 0.07            | -0.11       | 0.06  | -0.09       | 0.09  | 0.32 |
| 01 05              | 0.01        | 0.11            | -0.14       | 0.07  | 0.15        | 0.14  | 0.28 |
| 01 06              | 0.04        | 0.10            | 0.04        | 0.80  | -0.00       | 0.13  | 0.99 |
| 01 09              | -0.11       | 0.10            | -0.14       | 0.06  | 0.03        | 0.12  | 0.81 |
| 02 05              | 0.07        | 0.12            | -0.05       | 0.08  | 0.12        | 0.14  | 0.39 |
| 02 06              | 0.05        | 0.17            | 0.13        | 0.07  | -0.08       | 0.18  | 0.67 |
| 02 09              | -0.10       | 0.29            | -0.05       | 0.05  | -0.05       | 0.29  | 0.87 |
| 03 04              | -0.04       | 0.13            | -0.16       | 0.09  | 0.12        | 0.16  | 0.46 |
| 03 05              | -0.24       | 0.16            | -0.00       | 0.10  | -0.24       | 0.19  | 0.21 |
| 04 06              | 0.20        | 0.07            | 0.16        | 0.10  | 0.04        | 0.12  | 0.77 |
| 04 08              | -0.11       | 0.16            | -0.07       | 0.04  | -0.04       | 0.16  | 0.80 |
| 04 09              | 0.01        | 0.03            | 0.06        | 0.08  | -0.05       | 0.09  | 0.55 |
| 05 09              | 0.02        | 0.09            | -0.10       | 0.09  | 0.12        | 0.13  | 0.36 |
| 07 09 <sup>2</sup> | -0.09       | 0.14            | -0.13       | 66.79 | 0.04        | 66.71 | 0.99 |
| 07 10 <sup>2</sup> | 0.13        | 0.15            | 0.21        | 141.0 | -0.08       | 141.0 | 1.00 |
| 08 09              | 0.09        | 0.04            | 0.13        | 0.16  | -0.04       | 0.16  | 0.80 |

<sup>1</sup>standard error; <sup>2</sup>all the evidence about these contrasts comes from the trials which directly compare them.

[01=Refined grains, 02=Whole grains, 03=Fruit and Vegetables, 04=Nuts, 05=Legumes, 06=Eggs, 07=Dairy, 08=Fish, 09=Red meat, 10=SSB].



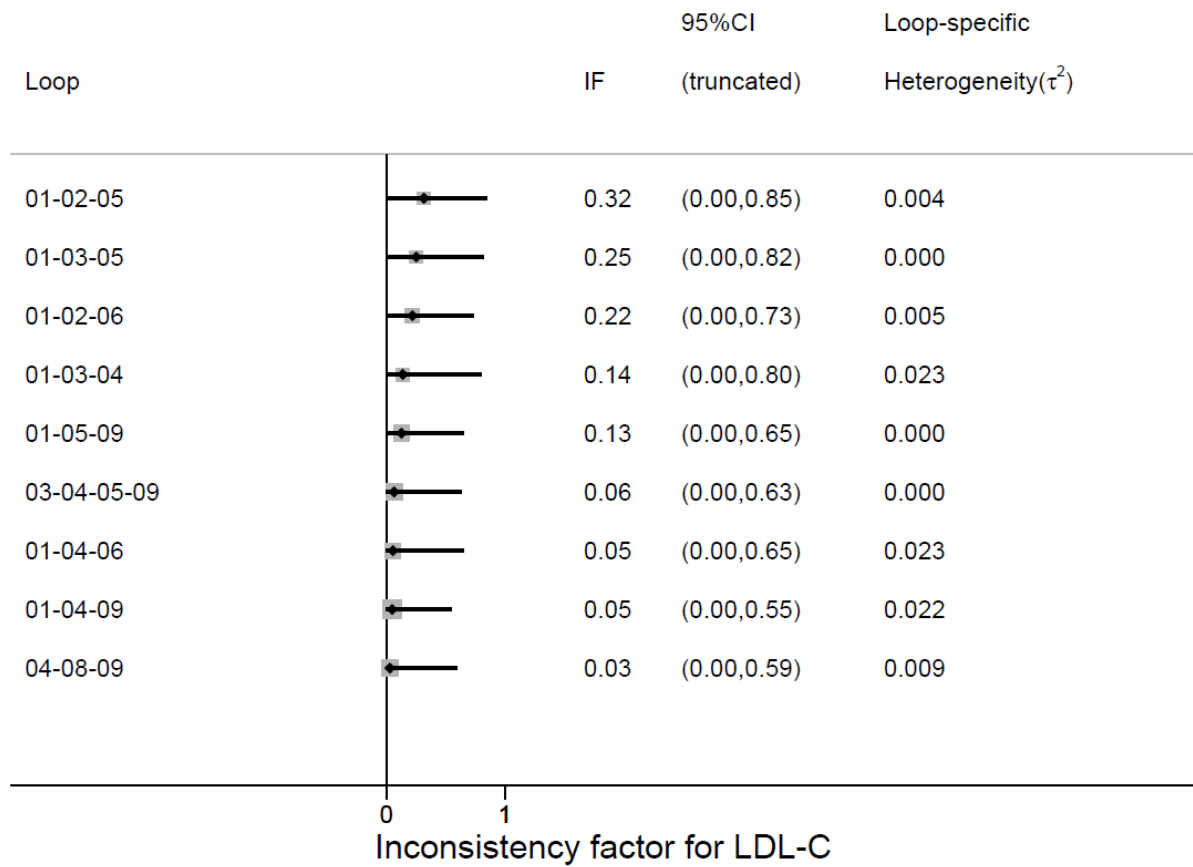

Supplemental Figure 8: Loop-specific approach for inconsistency for LDL-cholesterol

[01=Refined grains, 02=Whole grains, 03=Fruit and Vegetables, 04=Nuts, 05=Legumes, 06=Eggs, 07=Dairy, 08=Fish, 09=Red meat, 10=SSB].

Online Supporting Material

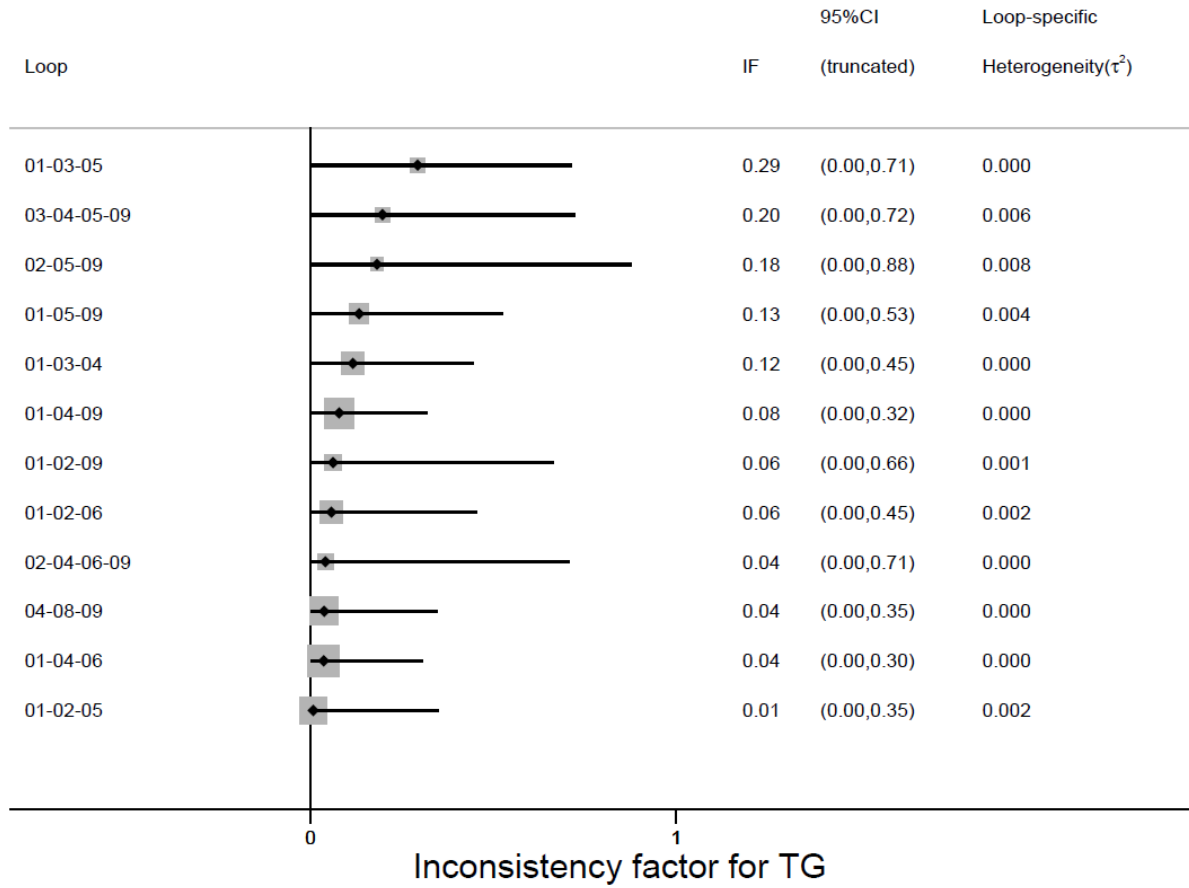

Supplemental Figure 9: Loop-specific approach for inconsistency for triacylglycerol

[01=Refined grains, 02=Whole grains, 03=Fruit and Vegetables, 04=Nuts, 05=Legumes, 06=Eggs, 07=Dairy, 08=Fish, 09=Red meat, 10=SSB].

Supplemental Table 14: League table (sensitivity analysis excluding high risk of bias RCTs) for LDL-cholesterol (mmol/l)

|                                       |                                       |                                       |                        |                         |                        |                        |                        |          |
|---------------------------------------|---------------------------------------|---------------------------------------|------------------------|-------------------------|------------------------|------------------------|------------------------|----------|
| Nuts                                  |                                       |                                       |                        |                         |                        |                        |                        |          |
| -0.11 <sup>1</sup><br>(-0.34, 0.12)   | Legumes                               |                                       |                        |                         |                        |                        |                        |          |
| -0.10<br>(-0.24, 0.04)                | 0.01<br>(-0.21, 0.23)                 | Whole grains                          |                        |                         |                        |                        |                        |          |
| <b>-0.24</b><br><b>(-0.36, -0.12)</b> | -0.13<br>(-0.34, 0.09)                | <b>-0.14</b><br><b>(-0.20, -0.07)</b> | Refined grains         |                         |                        |                        |                        |          |
| -0.13<br>(-0.40, 0.14)                | -0.02<br>(-0.36, 0.31)                | -0.03<br>(-0.30, 0.24)                | 0.10<br>(-0.16, 0.36)  | Fruit and<br>Vegetables |                        |                        |                        |          |
| <b>-0.25</b><br><b>(-0.46, -0.05)</b> | -0.14<br>(-0.43, 0.15)                | -0.15<br>(-0.36, 0.06)                | -0.01<br>(-0.22, 0.19) | -0.12<br>(-0.44, 0.21)  | Eggs                   |                        |                        |          |
| -0.35<br>(-0.80, 0.11)                | -0.24<br>(-0.70, 0.22)                | -0.25<br>(-0.70, 0.21)                | -0.11<br>(-0.56, 0.34) | -0.21<br>(-0.73, 0.30)  | -0.10<br>(-0.59, 0.39) | Dairy                  |                        |          |
| <b>-0.37</b><br><b>(-0.58, -0.15)</b> | <b>-0.26</b><br><b>(-0.49, -0.02)</b> | <b>-0.26</b><br><b>(-0.48, -0.04)</b> | -0.13<br>(-0.34, 0.08) | -0.23<br>(-0.56, 0.10)  | -0.12<br>(-0.40, 0.17) | -0.02<br>(-0.46, 0.43) | Fish                   |          |
| <b>-0.37</b><br><b>(-0.54, -0.19)</b> | <b>-0.26</b><br><b>(-0.44, -0.07)</b> | <b>-0.27</b><br><b>(-0.44, -0.09)</b> | -0.13<br>(-0.30, 0.04) | -0.23<br>(-0.54, 0.07)  | -0.12<br>(-0.37, 0.13) | -0.02<br>(-0.44, 0.40) | -0.00<br>(-0.15, 0.14) | Red meat |

<sup>1</sup> The value below the food groups correspond to the difference in mean in LDL-cholesterol (mmol/l) between the column and the row.

Supplemental Table 15: League table (sensitivity analysis excluding high risk of bias RCTs) for triacylglycerol (mmol/l)

|                                       |                        |                                       |                                    |                        |                                    |                       |                         |          |
|---------------------------------------|------------------------|---------------------------------------|------------------------------------|------------------------|------------------------------------|-----------------------|-------------------------|----------|
| Nuts                                  |                        |                                       |                                    |                        |                                    |                       |                         |          |
| -0.06 <sup>1</sup><br>(-0.20, 0.09)   | Legumes                |                                       |                                    |                        |                                    |                       |                         |          |
| -0.07<br>(-0.18, 0.03)                | -0.02<br>(-0.17, 0.13) | Whole grains                          |                                    |                        |                                    |                       |                         |          |
| <b>-0.15</b><br><b>(-0.24, -0.05)</b> | -0.09<br>(-0.24, 0.05) | <b>-0.07</b><br><b>(-0.12, -0.03)</b> | Refined grains                     |                        |                                    |                       |                         |          |
| -0.09<br>(-0.25, 0.07)                | -0.03<br>(-0.23, 0.17) | -0.01<br>(-0.17, 0.14)                | 0.06<br>(-0.08, 0.21)              | Fruit and Vegetables   |                                    |                       |                         |          |
| <b>-0.19</b><br><b>(-0.31, -0.07)</b> | -0.13<br>(-0.31, 0.04) | -0.11<br>(-0.25, 0.02)                | -0.04<br>(-0.16, 0.08)             | -0.10<br>(-0.28, 0.08) | Eggs                               |                       |                         |          |
| -0.11<br>(-0.39, 0.17)                | -0.05<br>(-0.35, 0.25) | -0.03<br>(-0.32, 0.26)                | 0.04<br>(-0.25, 0.33)              | -0.02<br>(-0.33, 0.30) | 0.08<br>(-0.22, 0.38)              | Dairy                 |                         |          |
| 0.07<br>(-0.01, 0.16)                 | 0.13<br>(-0.03, 0.29)  | <b>0.15</b><br><b>(0.01, 0.29)</b>    | <b>0.22</b><br><b>(0.10, 0.35)</b> | 0.16<br>(-0.01, 0.34)  | <b>0.26</b><br><b>(0.12, 0.40)</b> | 0.18<br>(-0.10, 0.46) | Fish                    |          |
| -0.02<br>(-0.09, 0.05)                | 0.04<br>(-0.10, 0.18)  | 0.06<br>(-0.05, 0.16)                 | <b>0.13</b><br><b>(0.03, 0.23)</b> | 0.07<br>(-0.09, 0.24)  | <b>0.17</b><br><b>(0.04, 0.30)</b> | 0.09<br>(-0.18, 0.36) | -0.09<br>(-0.18, -0.00) | Red meat |

<sup>1</sup> The value below the food groups correspond to the difference in mean in triacylglycerols (mmol/l) between the column and the row.

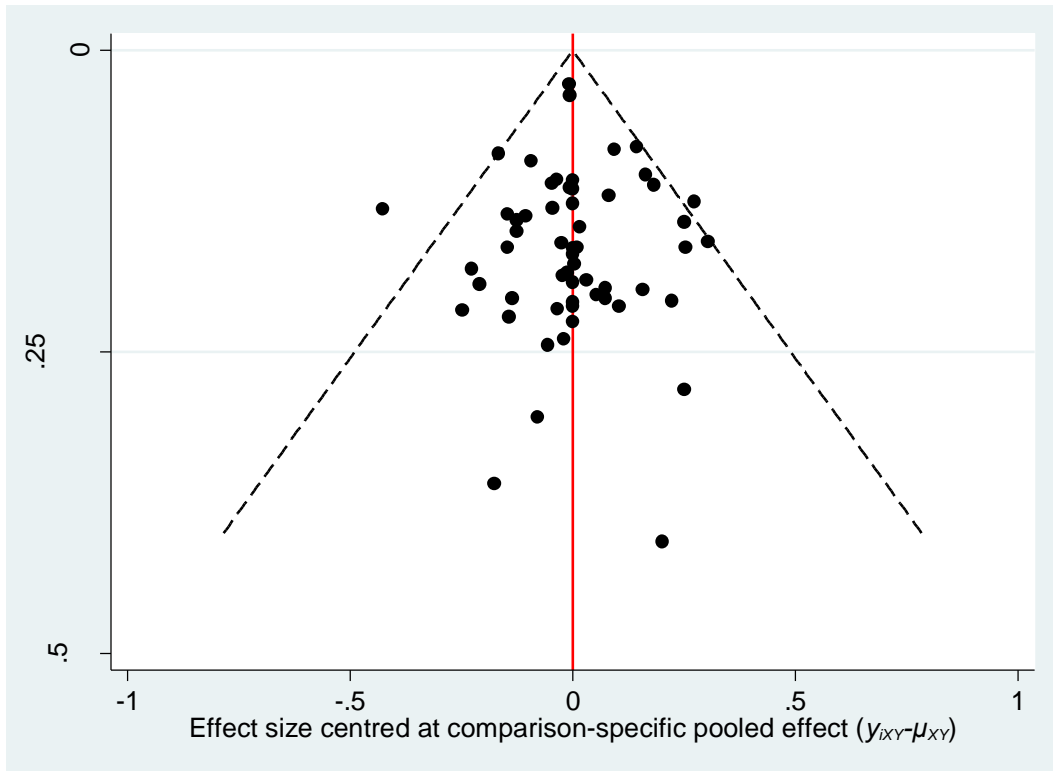

Supplemental Figure 10: Comparison-adjusted funnel plot for LDL-cholesterol involving all studies.

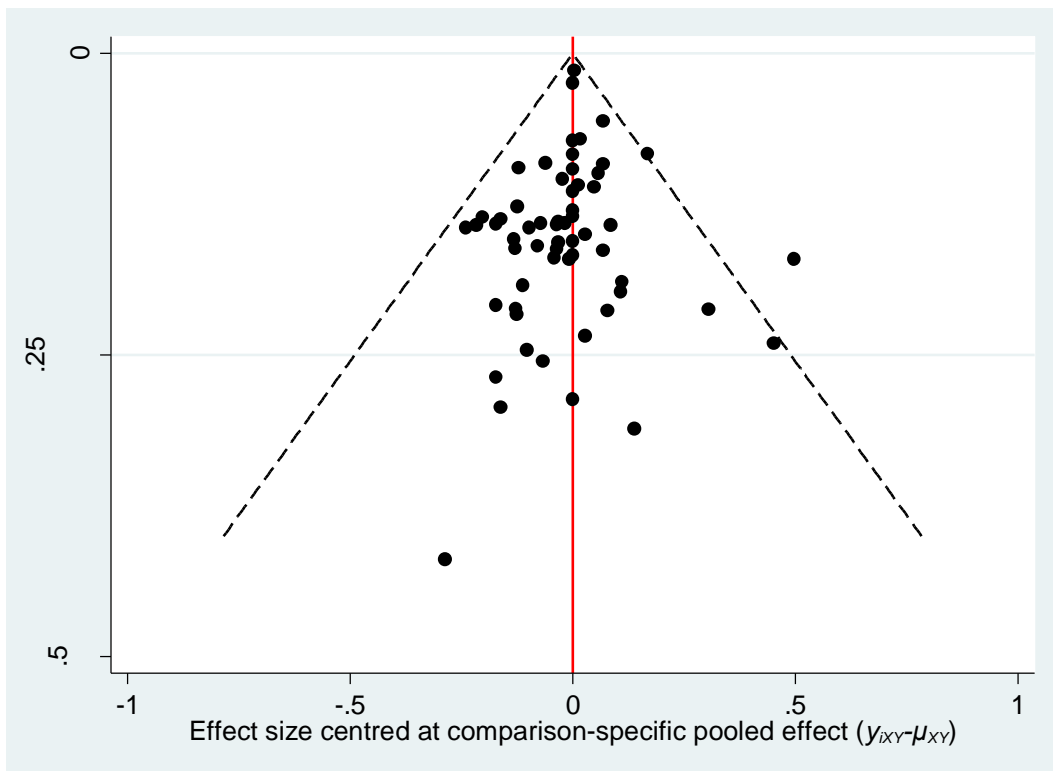

Supplemental Figure 11: Comparison-adjusted funnel plot for triacylglycerol involving all studies.

Online Supporting Material

Supplemental Table 16: GRADE evaluation for LDL-cholesterol and all comparisons between the different food groups.

| LDL-cholesterol (mmol/l)   |                   |                   |               |                |             |               |                  |                 |
|----------------------------|-------------------|-------------------|---------------|----------------|-------------|---------------|------------------|-----------------|
| Comparison <sup>1-10</sup> | Number of Studies | Study Limitations | Imprecision   | Heterogeneity  | Incoherence | Indirectness  | Publication bias | Rating          |
| <b>Mixed evidence</b>      |                   |                   |               |                |             |               |                  |                 |
| <b>1 vs 2</b>              | 26                | Some concerns     | No concerns   | Some concerns  | No concerns | Some concerns | Suspected        | <b>Low</b>      |
| <b>1 vs 3</b>              | 1                 | Some concerns     | Some concerns | No concerns    | No concerns | Some concerns | Suspected        | <b>Low</b>      |
| <b>1 vs 4</b>              | 5                 | Some concerns     | Some concerns | No concerns    | No concerns | Some concerns | Suspected        | <b>Low</b>      |
| <b>1 vs 5</b>              | 1                 | Some concerns     | Some concerns | No concerns    | No concerns | Some concerns | Suspected        | <b>Low</b>      |
| <b>1 vs 6</b>              | 1                 | Some concerns     | No concerns   | Major concerns | No concerns | Some concerns | Suspected        | <b>Very low</b> |
| <b>1 vs 9</b>              | 2                 | Some concerns     | Some concerns | No concerns    | No concerns | Some concerns | Suspected        | <b>Low</b>      |
| <b>2 vs 5</b>              | 2                 | Some concerns     | Some concerns | No concerns    | No concerns | Some concerns | Suspected        | <b>Low</b>      |
| <b>2 vs 6</b>              | 1                 | Some concerns     | Some concerns | No concerns    | No concerns | Some concerns | Suspected        | <b>Low</b>      |
| <b>3 vs 4</b>              | 1                 | Some concerns     | Some concerns | No concerns    | No concerns | Some concerns | Suspected        | <b>Low</b>      |

Online Supporting Material

|                          |    |                |                |             |             |               |           |                 |
|--------------------------|----|----------------|----------------|-------------|-------------|---------------|-----------|-----------------|
| <b>3 vs 5</b>            | 2  | Major concerns | Some concerns  | No concerns | No concerns | Some concerns | Suspected | <b>Very low</b> |
| <b>4 vs 6</b>            | 1  | Some concerns  | Some concerns  | No concerns | No concerns | Some concerns | Suspected | <b>Low</b>      |
| <b>4 vs 8</b>            | 1  | Some concerns  | Some concerns  | No concerns | No concerns | Some concerns | Suspected | <b>Low</b>      |
| <b>4 vs 9</b>            | 1  | Some concerns  | Some concerns  | No concerns | No concerns | Some concerns | Suspected | <b>Low</b>      |
| <b>5 vs 9</b>            | 4  | Some concerns  | Some concerns  | No concerns | No concerns | Some concerns | Suspected | <b>Low</b>      |
| <b>7 vs 9</b>            | 1  | Some concerns  | Major concerns | No concerns | No concerns | Some concerns | Suspected | <b>Very low</b> |
| <b>8 vs 9</b>            | 5  | Some concerns  | No concerns    | No concerns | No concerns | Some concerns | Suspected | <b>Low</b>      |
| <b>7 vs 10</b>           | 2  | Major concerns | Major concerns | No concerns | No concerns | Some concerns | Suspected | <b>Very low</b> |
| <b>Indirect evidence</b> |    |                |                |             |             |               |           |                 |
| <b>1 vs 7</b>            | -- | Some concerns  | Major concerns | No concerns | No concerns | Some concerns | Suspected | <b>Very low</b> |
| <b>1 vs 8</b>            | -- | Some concerns  | Some concerns  | No concerns | No concerns | Some concerns | Suspected | <b>Low</b>      |
| <b>1 vs 10</b>           | -- | Some concerns  | Major concerns | No concerns | No concerns | Some concerns | Suspected | <b>Very low</b> |

Online Supporting Material

|                |    |               |                |               |             |               |           |                 |
|----------------|----|---------------|----------------|---------------|-------------|---------------|-----------|-----------------|
| <b>2 vs 3</b>  | -- | Some concerns | Some concerns  | Some concerns | No concerns | Some concerns | Suspected | <b>Low</b>      |
| <b>2 vs 4</b>  | -- | Some concerns | Some concerns  | No concerns   | No concerns | Some concerns | Suspected | <b>Low</b>      |
| <b>2 vs 7</b>  | -- | Some concerns | Major concerns | No concerns   | No concerns | Some concerns | Suspected | <b>Very low</b> |
| <b>2 vs 8</b>  | -- | Some concerns | Some concerns  | No concerns   | No concerns | Some concerns | Suspected | <b>Low</b>      |
| <b>2 vs 9</b>  | -- | Some concerns | Some concerns  | No concerns   | No concerns | Some concerns | Suspected | <b>Low</b>      |
| <b>2 vs 10</b> | -- | Some concerns | Major concerns | No concerns   | No concerns | Some concerns | Suspected | <b>Very low</b> |
| <b>3 vs 6</b>  | -- | Some concerns | Some concerns  | No concerns   | No concerns | Some concerns | Suspected | <b>Low</b>      |
| <b>3 vs 7</b>  | -- | Some concerns | Major concerns | No concerns   | No concerns | Some concerns | Suspected | <b>Very low</b> |
| <b>3 vs 8</b>  | -- | Some concerns | Some concerns  | No concerns   | No concerns | Some concerns | Suspected | <b>Low</b>      |
| <b>3 vs 9</b>  | -- | Some concerns | Some concerns  | No concerns   | No concerns | Some concerns | Suspected | <b>Low</b>      |
| <b>3 vs 10</b> | -- | Some concerns | Major concerns | No concerns   | No concerns | Some concerns | Suspected | <b>Very low</b> |
| <b>4 vs 5</b>  | -- | Some concerns | Some concerns  | No concerns   | No concerns | Some concerns | Suspected | <b>Low</b>      |



Online Supporting Material

|                |    |               |                |               |             |               |           |                 |
|----------------|----|---------------|----------------|---------------|-------------|---------------|-----------|-----------------|
| <b>4 vs 7</b>  | -- | Some concerns | Some concerns  | No concerns   | No concerns | Some concerns | Suspected | <b>Low</b>      |
| <b>4 vs 10</b> | -- | Some concerns | Some concerns  | Some concerns | No concerns | Some concerns | Suspected | <b>Low</b>      |
| <b>5 vs 6</b>  | -- | Some concerns | Some concerns  | No concerns   | No concerns | Some concerns | Suspected | <b>Low</b>      |
| <b>5 vs 7</b>  | -- | Some concerns | Some concerns  | No concerns   | No concerns | Some concerns | Suspected | <b>Low</b>      |
| <b>5 vs 8</b>  | -- | Some concerns | Some concerns  | No concerns   | No concerns | Some concerns | Suspected | <b>Low</b>      |
| <b>5 vs 10</b> | -- | Some concerns | Major concerns | No concerns   | No concerns | Some concerns | Suspected | <b>Very low</b> |
| <b>6 vs 7</b>  | -- | Some concerns | Major concerns | No concerns   | No concerns | Some concerns | Suspected | <b>Very low</b> |
| <b>6 vs 8</b>  | -- | Some concerns | Some concerns  | Some concerns | No concerns | Some concerns | Suspected | <b>Low</b>      |
| <b>6 vs 9</b>  | -- | Some concerns | Some concerns  | No concerns   | No concerns | Some concerns | Suspected | <b>Low</b>      |
| <b>6 vs 10</b> | -- | Some concerns | Major concerns | No concerns   | No concerns | Some concerns | Suspected | <b>Very low</b> |
| <b>7 vs 8</b>  | -- | Some concerns | Major concerns | No concerns   | No concerns | Some concerns | Suspected | <b>Very low</b> |
| <b>8 vs 10</b> | -- | Some concerns | Major concerns | No concerns   | No concerns | Some concerns | Suspected | <b>Very low</b> |

Online Supporting Material

|                |    |                |                |             |             |               |           |                 |
|----------------|----|----------------|----------------|-------------|-------------|---------------|-----------|-----------------|
| <b>9 vs 10</b> | -- | Major concerns | Major concerns | No concerns | No concerns | Some concerns | Suspected | <b>Very low</b> |
|----------------|----|----------------|----------------|-------------|-------------|---------------|-----------|-----------------|

<sup>1</sup>Refined grains; <sup>2</sup>Whole grains; <sup>3</sup>Fruit and Vegetables; <sup>4</sup>Nuts; <sup>5</sup>Legumes; <sup>6</sup>Eggs; <sup>7</sup>Dairy; <sup>8</sup>Fish; <sup>9</sup>Red meat; <sup>10</sup>SSB

Supplemental Table 17: GRADE evaluation for triacylglycerol and all comparisons between the different food groups.

| Triacylglycerol (mmol/l)   |                   |                   |               |               |             |               |                  |            |
|----------------------------|-------------------|-------------------|---------------|---------------|-------------|---------------|------------------|------------|
| Comparison <sup>1-10</sup> | Number of Studies | Study Limitations | Imprecision   | Heterogeneity | Incoherence | Indirectness  | Publication bias | Rating     |
| <b>Mixed evidence</b>      |                   |                   |               |               |             |               |                  |            |
| <b>1 vs 2</b>              | 27                | Some concerns     | No concerns   | No concerns   | No concerns | Some concerns | Suspected        | <b>Low</b> |
| <b>1 vs 3</b>              | 1                 | Some concerns     | No concerns   | No concerns   | No concerns | Some concerns | Suspected        | <b>Low</b> |
| <b>1 vs 4</b>              | 5                 | Some concerns     | Some concerns | No concerns   | No concerns | Some concerns | Suspected        | <b>Low</b> |
| <b>1 vs 5</b>              | 1                 | Some concerns     | Some concerns | No concerns   | No concerns | Some concerns | Suspected        | <b>Low</b> |
| <b>1 vs 6</b>              | 1                 | Some concerns     | No concerns   | No concerns   | No concerns | Some concerns | Suspected        | <b>Low</b> |
| <b>1 vs 9</b>              | 2                 | Some concerns     | Some concerns | No concerns   | No concerns | Some concerns | Suspected        | <b>Low</b> |
| <b>2 vs 5</b>              | 2                 | Some concerns     | No concerns   | No concerns   | No concerns | Some concerns | Suspected        | <b>Low</b> |
| <b>2 vs 6</b>              | 1                 | Some concerns     | Some concerns | No concerns   | No concerns | Some concerns | Suspected        | <b>Low</b> |

Online Supporting Material

|                          |    |                |                |             |             |               |           |                 |
|--------------------------|----|----------------|----------------|-------------|-------------|---------------|-----------|-----------------|
| <b>2 vs 9</b>            | 1  | Some concerns  | No concerns    | No concerns | No concerns | Some concerns | Suspected | <b>Low</b>      |
| <b>3 vs 4</b>            | 1  | Some concerns  | Some concerns  | No concerns | No concerns | Some concerns | Suspected | <b>Low</b>      |
| <b>3 vs 5</b>            | 2  | Some concerns  | Some concerns  | No concerns | No concerns | Some concerns | Suspected | <b>Low</b>      |
| <b>4 vs 6</b>            | 1  | Some concerns  | Some concerns  | No concerns | No concerns | Some concerns | Suspected | <b>Low</b>      |
| <b>4 vs 8</b>            | 1  | Some concerns  | No concerns    | No concerns | No concerns | Some concerns | Suspected | <b>Low</b>      |
| <b>4 vs 9</b>            | 1  | Some concerns  | No concerns    | No concerns | No concerns | Some concerns | Suspected | <b>Low</b>      |
| <b>5 vs 9</b>            | 4  | Some concerns  | No concerns    | No concerns | No concerns | Some concerns | Suspected | <b>Low</b>      |
| <b>7 vs 9</b>            | 1  | Some concerns  | Some concerns  | No concerns | No concerns | Some concerns | Suspected | <b>Low</b>      |
| <b>8 vs 9</b>            | 5  | Some concerns  | No concerns    | No concerns | No concerns | Some concerns | Suspected | <b>Low</b>      |
| <b>7 vs 10</b>           | 2  | Major concerns | Some concerns  | No concerns | No concerns | Some concerns | Suspected | <b>Very low</b> |
| <b>Indirect evidence</b> |    |                |                |             |             |               |           |                 |
| <b>1 vs 7</b>            | -- | Some concerns  | Major concerns | No concerns | No concerns | Some concerns | Suspected | <b>Very low</b> |

Online Supporting Material

|                |    |               |                |             |             |               |           |                 |
|----------------|----|---------------|----------------|-------------|-------------|---------------|-----------|-----------------|
| <b>1 vs 8</b>  | -- | Some concerns | Some concerns  | No concerns | No concerns | Some concerns | Suspected | <b>Low</b>      |
| <b>1 vs 10</b> | -- | Some concerns | Major concerns | No concerns | No concerns | Some concerns | Suspected | <b>Very low</b> |
| <b>2 vs 3</b>  | -- | Some concerns | No concerns    | No concerns | No concerns | Some concerns | Suspected | <b>Low</b>      |
| <b>2 vs 4</b>  | -- | Some concerns | No concerns    | No concerns | No concerns | Some concerns | Suspected | <b>Low</b>      |
| <b>2 vs 7</b>  | -- | Some concerns | Major concerns | No concerns | No concerns | Some concerns | Suspected | <b>Very low</b> |
| <b>2 vs 8</b>  | -- | Some concerns | Some concerns  | No concerns | No concerns | Some concerns | Suspected | <b>Low</b>      |
| <b>2 vs 10</b> | -- | Some concerns | Major concerns | No concerns | No concerns | Some concerns | Suspected | <b>Very low</b> |
| <b>3 vs 6</b>  | -- | Some concerns | Some concerns  | No concerns | No concerns | Some concerns | Suspected | <b>Low</b>      |
| <b>3 vs 7</b>  | -- | Some concerns | Major concerns | No concerns | No concerns | Some concerns | Suspected | <b>Very low</b> |
| <b>3 vs 8</b>  | -- | Some concerns | Some concerns  | No concerns | No concerns | Some concerns | Suspected | <b>Low</b>      |
| <b>3 vs 9</b>  | -- | Some concerns | Some concerns  | No concerns | No concerns | Some concerns | Suspected | <b>Low</b>      |
| <b>3 vs 10</b> | -- | Some concerns | Major concerns | No concerns | No concerns | Some concerns | Suspected | <b>Very low</b> |

Online Supporting Material

|                |    |               |                |             |             |               |           |                 |
|----------------|----|---------------|----------------|-------------|-------------|---------------|-----------|-----------------|
| <b>4 vs 5</b>  | -- | Some concerns | No concerns    | No concerns | No concerns | Some concerns | Suspected | <b>Low</b>      |
| <b>4 vs 7</b>  | -- | Some concerns | Some concerns  | No concerns | No concerns | Some concerns | Suspected | <b>Low</b>      |
| <b>4 vs 10</b> | -- | Some concerns | Some concerns  | No concerns | No concerns | Some concerns | Suspected | <b>Low</b>      |
| <b>5 vs 6</b>  | -- | Some concerns | Some concerns  | No concerns | No concerns | Some concerns | Suspected | <b>Low</b>      |
| <b>5 vs 7</b>  | -- | Some concerns | Major concerns | No concerns | No concerns | Some concerns | Suspected | <b>Very low</b> |
| <b>5 vs 8</b>  | -- | Some concerns | Some concerns  | No concerns | No concerns | Some concerns | Suspected | <b>Low</b>      |
| <b>5 vs 10</b> | -- | Some concerns | Major concerns | No concerns | No concerns | Some concerns | Suspected | <b>Very low</b> |
| <b>6 vs 7</b>  | -- | Some concerns | Major concerns | No concerns | No concerns | Some concerns | Suspected | <b>Very low</b> |
| <b>6 vs 8</b>  | -- | Some concerns | Some concerns  | No concerns | No concerns | Some concerns | Suspected | <b>Low</b>      |
| <b>6 vs 9</b>  | -- | Some concerns | Some concerns  | No concerns | No concerns | Some concerns | Suspected | <b>Low</b>      |
| <b>6 vs 10</b> | -- | Some concerns | Major concerns | No concerns | No concerns | Some concerns | Suspected | <b>Very low</b> |
| <b>7 vs 8</b>  | -- | Some concerns | Some concerns  | No concerns | No concerns | Some concerns | Suspected | <b>Low</b>      |

Online Supporting Material

|                |    |                |               |             |             |               |           |                 |
|----------------|----|----------------|---------------|-------------|-------------|---------------|-----------|-----------------|
| <b>8 vs 10</b> | -- | Some concerns  | Some concerns | No concerns | No concerns | Some concerns | Suspected | <b>Low</b>      |
| <b>9 vs 10</b> | -- | Major concerns | Some concerns | No concerns | No concerns | Some concerns | Suspected | <b>Very low</b> |

<sup>1</sup>Refined grains; <sup>2</sup>Whole grains; <sup>3</sup>Fruit and Vegetables; <sup>4</sup>Nuts; <sup>5</sup>Legumes; <sup>6</sup>Eggs; <sup>7</sup>Dairy; <sup>8</sup>Fish; <sup>9</sup>Red meat; <sup>10</sup>SSB

## Supplemental References

1. Anderson JW, Story L, Sieling B, Chen WJ, Petro MS, Story J. Hypocholesterolemic effects of oat-bran or bean intake for hypercholesterolemic men. *Am J Clin Nutr* 1984;40(6):1146-55.
2. Jenkins DJ, Kendall CW, Popovich DG, Vidgen E, Mehling CC, Vuksan V, Ransom TP, Rao AV, Rosenberg-Zand R, Tariq N, et al. Effect of a very-high-fiber vegetable, fruit, and nut diet on serum lipids and colonic function. *Metabolism* 2001;50(4):494-503. doi: 10.1053/meta.2001.21037.
3. Nestel PJ, Nolan C, Bazelmans J, Cook R. Effects of a high-starch diet with low or high fiber content on postabsorptive glucose utilization and glucose production in normal subjects. *Diabetes Care* 1984;7(3):207-10.
4. Enright L, Slavin J. No effect of 14 day consumption of whole grain diet compared to refined grain diet on antioxidant measures in healthy, young subjects: a pilot study. *Nutr J* 2010;9:12. doi: 10.1186/1475-2891-9-12.
5. Broekmans WM, Klopping-Ketelaars WA, Kluft C, van den Berg H, Kok FJ, van Poppel G. Fruit and vegetables and cardiovascular risk profile: a diet controlled intervention study. *Eur J Clin Nutr* 2001;55(8):636-42. doi: 10.1038/sj.ejcn.1601192.
6. Dragsted LO, Pedersen A, Hermetter A, Basu S, Hansen M, Haren GR, Kall M, Breinholt V, Castenmiller JJ, Stagsted J, et al. The 6-a-day study: effects of fruit and vegetables on markers of oxidative stress and antioxidative defense in healthy nonsmokers. *Am J Clin Nutr* 2004;79(6):1060-72.
7. Kim JE, Gordon SL, Ferruzzi MG, Campbell WW. Effects of egg consumption on carotenoid absorption from co-consumed, raw vegetables. *Am J Clin Nutr* 2015;102(1):75-83. doi: 10.3945/ajcn.115.111062.
8. Anderson JW, Spencer DB, Hamilton CC, Smith SF, Tietzen J, Bryant CA, Oeltgen P. Oat-bran cereal lowers serum total and LDL cholesterol in hypercholesterolemic men. *Am J Clin Nutr* 1990;52(3):495-9.
9. Bodinham CL, Hitchen KL, Youngman PJ, Frost GS, Robertson MD. Short-term effects of whole-grain wheat on appetite and food intake in healthy adults: a pilot study. *Br J Nutr* 2011;106(3):327-30. doi: 10.1017/s0007114511000225.
10. Costabile A, Klinder A, Fava F, Napolitano A, Fogliano V, Leonard C, Gibson GR, Tuohy KM. Whole-grain wheat breakfast cereal has a prebiotic effect on the human gut microbiota: a double-blind, placebo-controlled, crossover study. *Br J Nutr* 2008;99(1):110-20. doi: 10.1017/s0007114507793923.



11. De Oliveira e Silva ER, Seidman CE, Tian JJ, Hudgins LC, Sacks FM, Breslow JL. Effects of shrimp consumption on plasma lipoproteins. *Am J Clin Nutr* 1996;64(5):712-7.
12. Weickert MO, Mohlig M, Schofl C, Arafat AM, Otto B, Viehoff H, Koebnick C, Kohl A, Spranger J, Pfeiffer AF. Cereal fiber improves whole-body insulin sensitivity in overweight and obese women. *Diabetes Care* 2006;29(4):775-80.
13. Stephen AM, Dahl WJ, Sieber GM, van Blaricom JA, Morgan DR. Effect of green lentils on colonic function, nitrogen balance, and serum lipids in healthy human subjects. *Am J Clin Nutr* 1995;62(6):1261-7.
14. Edwards K, Kwaw I, Matud J, Kurtz I. Effect of pistachio nuts on serum lipid levels in patients with moderate hypercholesterolemia. *J Am Coll Nutr* 1999;18(3):229-32.
15. Giacco R, Clemente G, Cipriano D, Luongo D, Viscovo D, Patti L, Di Marino L, Giacco A, Naviglio D, Bianchi MA, et al. Effects of the regular consumption of wholemeal wheat foods on cardiovascular risk factors in healthy people. *Nutr Metab Cardiovasc Dis* 2010;20(3):186-94. doi: 10.1016/j.numecd.2009.03.025.
16. Karlstrom B, Vessby B, Asp NG, Boberg M, Gustafsson IB, Lithell H, Werner I. Effects of an increased content of cereal fibre in the diet of Type 2 (non-insulin-dependent) diabetic patients. *Diabetologia* 1984;26(4):272-7.
17. Kerckhoffs DA, Hornstra G, Mensink RP. Cholesterol-lowering effect of beta-glucan from oat bran in mildly hypercholesterolemic subjects may decrease when beta-glucan is incorporated into bread and cookies. *Am J Clin Nutr* 2003;78(2):221-7.
18. Kirby RW, Anderson JW, Sieling B, Rees ED, Chen WJ, Miller RE, Kay RM. Oat-bran intake selectively lowers serum low-density lipoprotein cholesterol concentrations of hypercholesterolemic men. *Am J Clin Nutr* 1981;34(5):824-9.
19. Luhovyy BL, Mollard RC, Yurchenko S, Nunez MF, Berengut S, Liu TT, Smith CE, Pelkman CL, Anderson GH. The effects of whole grain high-amylose maize flour as a source of resistant starch on blood glucose, satiety, and food intake in young men. *Journal of food science* 2014;79(12):H2550-6. doi: 10.1111/1750-3841.12690.
20. Ross AB, Bruce SJ, Blondel-Lubrano A, Oguey-Araymon S, Beaumont M, Bourgeois A, Nielsen-Moennoz C, Vigo M, Fay LB, Kochhar S, et al. A whole-grain cereal-rich diet increases plasma betaine, and tends to decrease total and LDL-cholesterol compared with a refined-grain diet in healthy subjects. *Br J Nutr* 2011;105(10):1492-502. doi: 10.1017/s0007114510005209.
21. Soerensen KV, Thorning TK, Astrup A, Kristensen M, Lorenzen JK. Effect of dairy calcium from cheese and milk on fecal fat excretion, blood lipids, and appetite in young men. *Am J Clin Nutr* 2014;99(5):984-91. doi: 10.3945/ajcn.113.077735.

22. Mackay S, Ball MJ. Do beans and oat bran add to the effectiveness of a low-fat diet? *Eur J Clin Nutr* 1992;46(9):641-8.
23. Davidson MH, Dugan LD, Burns JH, Bova J, Story K, Drennan KB. The hypocholesterolemic effects of beta-glucan in oatmeal and oat bran. A dose-controlled study. *Jama* 1991;265(14):1833-9.
24. Vander Wal JS, Gupta A, Khosla P, Dhurandhar NV. Egg breakfast enhances weight loss. *Int J Obes (Lond)* 2008;32(10):1545-51. doi: 10.1038/ijo.2008.130.
25. van Houwelingen R, Zevenbergen H, Groot P, Kester A, Hornstra G. Dietary-fish effects on serum lipids and apolipoproteins, a controlled study. *Am J Clin Nutr* 1990;51(3):393-8.
26. Whyte JL, McArthur R, Topping D, Nestel P. Oat bran lowers plasma cholesterol levels in mildly hypercholesterolemic men. *J Am Diet Assoc* 1992;92(4):446-9.
27. Arora RC, Agarwal N, Arora S, Garg RK, Kumar N, Lakhtakia S. A comparative study of three different test diets in change in plasma total cholesterol in young healthy individuals. *Materia medica Polona Polish journal of medicine and pharmacy* 1991;23(4):296-8.
28. Bell LP, Hectorn KJ, Reynolds H, Hunninghake DB. Cholesterol-lowering effects of soluble-fiber cereals as part of a prudent diet for patients with mild to moderate hypercholesterolemia. *Am J Clin Nutr* 1990;52(6):1020-6.
29. Brownlee IA, Moore C, Chatfield M, Richardson DP, Ashby P, Kuznesof SA, Jebb SA, Seal CJ. Markers of cardiovascular risk are not changed by increased whole-grain intake: the WHOLEheart study, a randomised, controlled dietary intervention. *Br J Nutr* 2010;104(1):125-34. doi: 10.1017/s0007114510000644.
30. Oosthuizen W, Scholtz CS, Vorster HH, Jerling JC, Vermaak WJ. Extruded dry beans and serum lipoprotein and plasma haemostatic factors in hyperlipidaemic men. *Eur J Clin Nutr* 2000;54(5):373-9.
31. Van Horn L, Emidy LA, Liu KA, Liao YL, Ballew C, King J, Stamler J. Serum lipid response to a fat-modified, oatmeal-enhanced diet. *Preventive medicine* 1988;17(3):377-86.
32. Van Horn L, Moag-Stahlberg A, Liu KA, Ballew C, Ruth K, Hughes R, Stamler J. Effects on serum lipids of adding instant oats to usual American diets. *Am J Public Health* 1991;81(2):183-8.
33. Roberts SL, McMurry MP, Connor WE. Does egg feeding (i.e., dietary cholesterol) affect plasma cholesterol levels in humans? The results of a double-blind study. *Am J Clin Nutr* 1981;34(10):2092-9.

34. Scott LW, Dunn JK, Pownall HJ, Brauchi DJ, McMann MC, Herd JA, Harris KB, Savell JW, Cross HR, Gotto AM, Jr. Effects of beef and chicken consumption on plasma lipid levels in hypercholesterolemic men. *Arch Intern Med* 1994;154(11):1261-7.
35. Gascon A, Jacques H, Moorjani S, Deshaies Y, Brun LD, Julien P. Plasma lipoprotein profile and lipolytic activities in response to the substitution of lean white fish for other animal protein sources in premenopausal women. *Am J Clin Nutr* 1996;63(3):315-21.
36. Liljeberg HG, Granfeldt YE, Bjorck IM. Products based on a high fiber barley genotype, but not on common barley or oats, lower postprandial glucose and insulin responses in healthy humans. *J Nutr* 1996;126(2):458-66.
37. Agren JJ, Hanninen O, Julkunen A, Fogelholm L, Vidgren H, Schwab U, Pynnonen O, Uusitupa M. Fish diet, fish oil and docosahexaenoic acid rich oil lower fasting and postprandial plasma lipid levels. *Eur J Clin Nutr* 1996;50(11):765-71.
38. Behall KM, Scholfield DJ, Hallfrisch J. The effect of particle size of whole-grain flour on plasma glucose, insulin, glucagon and thyroid-stimulating hormone in humans. *J Am Coll Nutr* 1999;18(6):591-7.
39. Morgan JM, Horton K, Reese D, Carey C, Walker K, Capuzzi DM. Effects of walnut consumption as part of a low-fat, low-cholesterol diet on serum cardiovascular risk factors. *Int J Vitam Nutr Res* 2002;72(5):341-7. doi: 10.1024/0300-9831.72.5.341.
40. Jenkins DJ, Kendall CW, Vidgen E, Mehling CC, Parker T, Seyler H, Faulkner D, Garsetti M, Griffin LC, Agarwal S, et al. The effect on serum lipids and oxidized low-density lipoprotein of supplementing self-selected low-fat diets with soluble-fiber, soy, and vegetable protein foods. *Metabolism* 2000;49(1):67-72.
41. Wong JM, Kendall CW, de Souza R, Emam A, Marchie A, Vidgen E, Holmes C, Jenkins DJ. The effect on the blood lipid profile of soy foods combined with a prebiotic: a randomized controlled trial. *Metabolism* 2010;59(9):1331-40. doi: 10.1016/j.metabol.2009.12.017.
42. John JH, Ziebland S, Yudkin P, Roe LS, Neil HA. Effects of fruit and vegetable consumption on plasma antioxidant concentrations and blood pressure: a randomised controlled trial. *Lancet* 2002;359(9322):1969-74.
43. Sacks FM, Salazar J, Miller L, Foster JM, Sutherland M, Samonds KW, Albers JJ, Kass EH. Ingestion of egg raises plasma low density lipoproteins in free-living subjects. *Lancet* 1984;1(8378):647-9.
44. Birketvedt GS, Travis A, Langbakk B, Florholmen JR. Dietary supplementation with bean extract improves lipid profile in overweight and obese subjects. *Nutrition (Burbank, Los Angeles County, Calif)* 2002;18(9):729-33.

45. Liao FH, Shieh MJ, Yang SC, Lin SH, Chien YW. Effectiveness of a soy-based compared with a traditional low-calorie diet on weight loss and lipid levels in overweight adults. *Nutrition (Burbank, Los Angeles County, Calif)* 2007;23(7-8):551-6. doi: 10.1016/j.nut.2007.05.003.
46. Hermsdorff HH, Zulet MA, Abete I, Martinez JA. A legume-based hypocaloric diet reduces proinflammatory status and improves metabolic features in overweight/obese subjects. *Eur J Nutr* 2011;50(1):61-9. doi: 10.1007/s00394-010-0115-x.
47. Johansson-Persson A, Ulmius M, Cloetens L, Karhu T, Herzig KH, Onning G. A high intake of dietary fiber influences C-reactive protein and fibrinogen, but not glucose and lipid metabolism, in mildly hypercholesterolemic subjects. *Eur J Nutr* 2014;53(1):39-48. doi: 10.1007/s00394-013-0496-8.
48. Chang HC, Huang CN, Yeh DM, Wang SJ, Peng CH, Wang CJ. Oat prevents obesity and abdominal fat distribution, and improves liver function in humans. *Plant foods for human nutrition (Dordrecht, Netherlands)* 2013;68(1):18-23. doi: 10.1007/s11130-013-0336-2.
49. Maskarinec G, Chan CL, Meng L, Franke AA, Cooney RV. Exploring the feasibility and effects of a high-fruit and -vegetable diet in healthy women. *Cancer epidemiology, biomarkers & prevention : a publication of the American Association for Cancer Research, cosponsored by the American Society of Preventive Oncology* 1999;8(10):919-24.
50. Smith-Warner SA, Elmer PJ, Tharp TM, Fosdick L, Randall B, Gross M, Wood J, Potter JD. Increasing vegetable and fruit intake: randomized intervention and monitoring in an at-risk population. *Cancer epidemiology, biomarkers & prevention : a publication of the American Association for Cancer Research, cosponsored by the American Society of Preventive Oncology* 2000;9(3):307-17.
51. Sheridan MJ, Cooper JN, Erario M, Cheifetz CE. Pistachio nut consumption and serum lipid levels. *J Am Coll Nutr* 2007;26(2):141-8.
52. Rock CL, Flatt SW, Wright FA, Faerber S, Newman V, Kealey S, Pierce JP. Responsiveness of carotenoids to a high vegetable diet intervention designed to prevent breast cancer recurrence. *Cancer epidemiology, biomarkers & prevention : a publication of the American Association for Cancer Research, cosponsored by the American Society of Preventive Oncology* 1997;6(8):617-23.
53. Pecis M, de Azevedo MJ, Gross JL. Chicken and fish diet reduces glomerular hyperfiltration in IDDM patients. *Diabetes Care* 1994;17(7):665-72.
54. Prescott SL, Jenner DA, Beilin LJ, Margetts BM, Vandongen R. A randomized controlled trial of the effect on blood pressure of dietary non-meat protein versus meat protein in normotensive omnivores. *Clinical science (London, England : 1979)* 1988;74(6):665-72.

55. Singh RB, Niaz MA, Ghosh S. Effect on central obesity and associated disturbances of low-energy, fruit- and vegetable-enriched prudent diet in north Indians. *Postgraduate medical journal* 1994;70(830):895-900.
56. Mori TA, Vandongen R, Beilin LJ, Burke V, Morris J, Ritchie J. Effects of varying dietary fat, fish, and fish oils on blood lipids in a randomized controlled trial in men at risk of heart disease. *Am J Clin Nutr* 1994;59(5):1060-8.
57. Dunstan D, Mori T, Puddey I, Beilin L, Burke V, Morton A, Stanton K. The independent and combined effects of aerobic exercise and dietary fish intake on serum lipids and glycemic control in NIDDM. A randomized controlled study. *Diabetes care* [Clinical Trial; Comparative Study; Randomized Controlled Trial; Research Support, Non-U.S. Gov't] 1997;20:913-21. Internet: <http://onlinelibrary.wiley.com/o/cochrane/clcentral/articles/045/CN-00140045/frame.html> accessed Date Accessed)].
58. Njike V, Faridi Z, Dutta S, Gonzalez-Simon AL, Katz DL. Daily egg consumption in hyperlipidemic adults--effects on endothelial function and cardiovascular risk. *Nutr J* 2010;9:28. doi: 10.1186/1475-2891-9-28.
59. Christensen AS, Viggers L, Hasselstrom K, Gregersen S. Effect of fruit restriction on glycemic control in patients with type 2 diabetes--a randomized trial. *Nutr J* 2013;12:29. doi: 10.1186/1475-2891-12-29.
60. Rideout TC, Marinangeli CP, Martin H, Browne RW, Rempel CB. Consumption of low-fat dairy foods for 6 months improves insulin resistance without adversely affecting lipids or bodyweight in healthy adults: a randomized free-living cross-over study. *Nutr J* 2013;12:56. doi: 10.1186/1475-2891-12-56.
61. Ramprasath VR, Jenkins DJ, Lamarche B, Kendall CW, Faulkner D, Cermakova L, Couture P, Ireland C, Abdulnour S, Patel D, et al. Consumption of a dietary portfolio of cholesterol lowering foods improves blood lipids without affecting concentrations of fat soluble compounds. *Nutr J* 2014;13:101. doi: 10.1186/1475-2891-13-101.
62. Kondo K, Morino K, Nishio Y, Kondo M, Nakao K, Nakagawa F, Ishikado A, Sekine O, Yoshizaki T, Kashiwagi A, et al. A fish-based diet intervention improves endothelial function in postmenopausal women with type 2 diabetes mellitus: a randomized crossover trial. *Metabolism* 2014;63(7):930-40. doi: 10.1016/j.metabol.2014.04.005.
63. Jang Y, Lee JH, Kim OY, Park HY, Lee SY. Consumption of whole grain and legume powder reduces insulin demand, lipid peroxidation, and plasma homocysteine concentrations in patients with coronary artery disease: randomized controlled clinical trial. *Arteriosclerosis, thrombosis, and vascular biology* 2001;21(12):2065-71.
64. Wallace IR, McEvoy CT, Hunter SJ, Hamill LL, Ennis CN, Bell PM, Patterson CC, Woodside JV, Young IS, McKinley MC. Dose-response effect of fruit and vegetables

- on insulin resistance in people at high risk of cardiovascular disease: a randomized controlled trial. *Diabetes Care* 2013;36(12):3888-96. doi: 10.2337/dc13-0718.
65. Cox DN, Anderson AS, Reynolds J, McKellar S, Lean ME, Mela DJ. Take Five, a nutrition education intervention to increase fruit and vegetable intakes: impact on consumer choice and nutrient intakes. *Br J Nutr* 1998;80(2):123-31.
  66. Neville CE, Young IS, Gilchrist SE, McKinley MC, Gibson A, Edgar JD, Woodside JV. Effect of increased fruit and vegetable consumption on physical function and muscle strength in older adults. *Age (Dordrecht, Netherlands)* 2013;35(6):2409-22. doi: 10.1007/s11357-013-9530-2.
  67. Onning G, Wallmark A, Persson M, Akesson B, Elmstahl S, Oste R. Consumption of oat milk for 5 weeks lowers serum cholesterol and LDL cholesterol in free-living men with moderate hypercholesterolemia. *Ann Nutr Metab* 1999;43(5):301-9. doi: 10.1159/000012798.
  68. Surai PF, MacPherson A, Speake BK, Sparks NH. Designer egg evaluation in a controlled trial. *Eur J Clin Nutr* 2000;54(4):298-305.
  69. Berg A, Konig D, Deibert P, Grathwohl D, Berg A, Baumstark MW, Franz IW. Effect of an oat bran enriched diet on the atherogenic lipid profile in patients with an increased coronary heart disease risk. A controlled randomized lifestyle intervention study. *Ann Nutr Metab* 2003;47(6):306-11. doi: 10.1159/000072404.
  70. Meyer BJ, Larkin TA, Owen AJ, Astheimer LB, Tapsell LC, Howe PR. Limited lipid-lowering effects of regular consumption of whole soybean foods. *Ann Nutr Metab* 2004;48(2):67-78. doi: 10.1159/000075592.
  71. Roberts DC, Truswell AS, Bencke A, Dewar HM, Farmakalidis E. The cholesterol-lowering effect of a breakfast cereal containing psyllium fibre. *Med J Aust* 1994;161(11-12):660-4.
  72. Poulter N, Chang CL, Cuff A, Poulter C, Sever P, Thom S. Lipid profiles after the daily consumption of an oat-based cereal: a controlled crossover trial. *Am J Clin Nutr* 1994;59(1):66-9.
  73. Kazemzadeh M, Safavi SM, Nematollahi S, Nourieh Z. Effect of Brown Rice Consumption on Inflammatory Marker and Cardiovascular Risk Factors among Overweight and Obese Non-menopausal Female Adults. *Int J Prev Med* 2014;5(4):478-88.
  74. Weerts SE, Amoran A. Pass the fruits and vegetables! A community-university-industry partnership promotes weight loss in African American women. *Health promotion practice* 2011;12(2):252-60. doi: 10.1177/1524839908330810.

75. Smith DR, Wood R, Tseng S, Smith SB. Increased beef consumption increases apolipoprotein A-I but not serum cholesterol of mildly hypercholesterolemic men with different levels of habitual beef intake. *Experimental biology and medicine* (Maywood, NJ) 2002;227(4):266-75.
76. Bradbury J, Thomason JM, Jepson NJ, Walls AW, Allen PF, Moynihan PJ. Nutrition counseling increases fruit and vegetable intake in the edentulous. *Journal of dental research* 2006;85(5):463-8. doi: 10.1177/154405910608500513.
77. Ros E, Nunez I, Perez-Heras A, Serra M, Gilabert R, Casals E, Deulofeu R. A walnut diet improves endothelial function in hypercholesterolemic subjects: a randomized crossover trial. *Circulation* 2004;109(13):1609-14. doi: 10.1161/01.cir.0000124477.91474.ff.
78. Aadland EK, Lavigne C, Graff IE, Eng O, Paquette M, Holthe A, Mellgren G, Jacques H, Liaset B. Lean-seafood intake reduces cardiovascular lipid risk factors in healthy subjects: results from a randomized controlled trial with a crossover design. *Am J Clin Nutr* 2015;102(3):582-92. doi: 10.3945/ajcn.115.112086.
79. Abdullah MM, Cyr A, Lepine MC, Labonte ME, Couture P, Jones PJ, Lamarche B. Recommended dairy product intake modulates circulating fatty acid profile in healthy adults: a multi-centre cross-over study. *Br J Nutr* 2015;113(3):435-44. doi: 10.1017/s0007114514003894.
80. Abete I, Parra D, Martinez JA. Legume-, fish-, or high-protein-based hypocaloric diets: effects on weight loss and mitochondrial oxidation in obese men. *J Med Food* 2009;12(1):100-8. doi: 10.1089/jmf.2007.0700.
81. Abete I, Parra D, De Morentin BM, Alfredo Martinez J. Effects of two energy-restricted diets differing in the carbohydrate/protein ratio on weight loss and oxidative changes of obese men. *Int J Food Sci Nutr* 2009;60 Suppl 3:1-13. doi: 10.1080/09637480802232625.
82. Adamsson V, Reumark A, Marklund M, Larsson A, Riserus U. Role of a prudent breakfast in improving cardiometabolic risk factors in subjects with hypercholesterolemia: a randomized controlled trial. *Clin Nutr* 2015;34(1):20-6. doi: 10.1016/j.clnu.2014.04.009.
83. Mori TA, Bao DQ, Burke V, Puddey IB, Watts GF, Beilin LJ. Dietary fish as a major component of a weight-loss diet: effect on serum lipids, glucose, and insulin metabolism in overweight hypertensive subjects. *Am J Clin Nutr* 1999;70(5):817-25.
84. Davy BM, Davy KP, Ho RC, Beske SD, Davrath LR, Melby CL. High-fiber oat cereal compared with wheat cereal consumption favorably alters LDL-cholesterol subclass and particle numbers in middle-aged and older men. *Am J Clin Nutr* 2002;76(2):351-8.

85. Jenkins DJ, Kendall CW, Jackson CJ, Connelly PW, Parker T, Faulkner D, Vidgen E, Cunnane SC, Leiter LA, Josse RG. Effects of high- and low-isoflavone soyfoods on blood lipids, oxidized LDL, homocysteine, and blood pressure in hyperlipidemic men and women. *Am J Clin Nutr* 2002;76(2):365-72.
86. Keogh GF, Cooper GJ, Mulvey TB, McArdle BH, Coles GD, Monro JA, Poppitt SD. Randomized controlled crossover study of the effect of a highly beta-glucan-enriched barley on cardiovascular disease risk factors in mildly hypercholesterolemic men. *Am J Clin Nutr* 2003;78(4):711-8.
87. Hall WL, Vafeiadou K, Hallund J, Bugel S, Koebnick C, Reimann M, Ferrari M, Branca F, Talbot D, Dadd T, et al. Soy-isoflavone-enriched foods and inflammatory biomarkers of cardiovascular disease risk in postmenopausal women: interactions with genotype and equol production. *Am J Clin Nutr* 2005;82(6):1260-8; quiz 365-6.
88. Laaksonen DE, Toppinen LK, Juntunen KS, Autio K, Liukkonen KH, Poutanen KS, Niskanen L, Mykkanen HM. Dietary carbohydrate modification enhances insulin secretion in persons with the metabolic syndrome. *Am J Clin Nutr* 2005;82(6):1218-27.
89. Watzl B, Kulling SE, Moseneder J, Barth SW, Bub A. A 4-wk intervention with high intake of carotenoid-rich vegetables and fruit reduces plasma C-reactive protein in healthy, nonsmoking men. *Am J Clin Nutr* 2005;82(5):1052-8.
90. de Mello VD, Zelmanovitz T, Perassolo MS, Azevedo MJ, Gross JL. Withdrawal of red meat from the usual diet reduces albuminuria and improves serum fatty acid profile in type 2 diabetes patients with macroalbuminuria. *Am J Clin Nutr* 2006;83(5):1032-8.
91. Hall WL, Vafeiadou K, Hallund J, Bugel S, Reimann M, Koebnick C, Zunft HJ, Ferrari M, Branca F, Dadd T, et al. Soy-isoflavone-enriched foods and markers of lipid and glucose metabolism in postmenopausal women: interactions with genotype and equol production. *Am J Clin Nutr* 2006;83(3):592-600.
92. Wennersberg MH, Smedman A, Turpeinen AM, Retterstol K, Tengblad S, Lipre E, Aro A, Mutanen P, Seljeflot I, Basu S, et al. Dairy products and metabolic effects in overweight men and women: results from a 6-mo intervention study. *Am J Clin Nutr* 2009;90(4):960-8. doi: 10.3945/ajcn.2009.27664.
93. Liu ZM, Chen YM, Ho SC, Ho YP, Woo J. Effects of soy protein and isoflavones on glycemic control and insulin sensitivity: a 6-mo double-blind, randomized, placebo-controlled trial in postmenopausal Chinese women with prediabetes or untreated early diabetes. *Am J Clin Nutr* 2010;91(5):1394-401. doi: 10.3945/ajcn.2009.28813.
94. Foster GD, Shantz KL, Vander Veur SS, Oliver TL, Lent MR, Virus A, Szapary PO, Rader DJ, Zemel BS, Gilden-Tsai A. A randomized trial of the effects of an almond-enriched, hypocaloric diet in the treatment of obesity. *Am J Clin Nutr* 2012;96(2):249-54. doi: 10.3945/ajcn.112.037895.



95. Azadbakht L, Haghghatdoost F, Karimi G, Esmailzadeh A. Effect of consuming salad and yogurt as preload on body weight management and cardiovascular risk factors: a randomized clinical trial. *Int J Food Sci Nutr* 2013;64(4):392-9. doi: 10.3109/09637486.2012.753039.
96. Bakhtiary A, Yassin Z, Hanachi P, Rahmat A, Ahmad Z, Jalali F. Effects of soy on metabolic biomarkers of cardiovascular disease in elderly women with metabolic syndrome. *Arch Iran Med* 2012;15(8):462-8. doi: 012158/aim.004.
97. Balfego M, Canivell S, Hanzu FA, Sala-Vila A, Martinez-Medina M, Murillo S, Mur T, Ruano EG, Linares F, Porrás N, et al. Effects of sardine-enriched diet on metabolic control, inflammation and gut microbiota in drug-naive patients with type 2 diabetes: a pilot randomized trial. *Lipids Health Dis* 2016;15:78. doi: 10.1186/s12944-016-0245-0.
98. Baumgartner S, Kelly ER, van der Made S, Berendschot TT, Husche C, Lutjohann D, Plat J. The influence of consuming an egg or an egg-yolk buttermilk drink for 12 wk on serum lipids, inflammation, and liver function markers in human volunteers. *Nutrition (Burbank, Los Angeles County, Calif)* 2013;29(10):1237-44. doi: 10.1016/j.nut.2013.03.020.
99. Behall KM, Scholfield DJ, Hallfrisch J. Whole-grain diets reduce blood pressure in mildly hypercholesterolemic men and women. *J Am Diet Assoc* 2006;106(9):1445-9. doi: 10.1016/j.jada.2006.06.010.
100. Behall KM, Scholfield DJ, Hallfrisch J. Diets containing barley significantly reduce lipids in mildly hypercholesterolemic men and women. *Am J Clin Nutr* 2004;80(5):1185-93.
101. Azadbakht L, Shakerhosseini R, Atabak S, Jamshidian M, Mehrabi Y, Esmail-Zadeh A. Beneficiary effect of dietary soy protein on lowering plasma levels of lipid and improving kidney function in type II diabetes with nephropathy. *Eur J Clin Nutr* 2003;57(10):1292-4. doi: 10.1038/sj.ejcn.1601688.
102. Bento AP, Cominetti C, Simoes Filho A, Naves MM. Baru almond improves lipid profile in mildly hypercholesterolemic subjects: a randomized, controlled, crossover study. *Nutr Metab Cardiovasc Dis* 2014;24(12):1330-6. doi: 10.1016/j.numecd.2014.07.002.
103. Berry SE, Mulla UZ, Chowienczyk PJ, Sanders TA. Increased potassium intake from fruit and vegetables or supplements does not lower blood pressure or improve vascular function in UK men and women with early hypertension: a randomised controlled trial. *Br J Nutr* 2010;104(12):1839-47. doi: 10.1017/s0007114510002904.
104. Jaceldo-Siegl K, Sabate J, Rajaram S, Fraser GE. Long-term almond supplementation without advice on food replacement induces favourable nutrient modifications to the habitual diets of free-living individuals. *Br J Nutr* 2004;92(3):533-40.

105. Ghadirian P, Shatenstein B, Verdy M, Hamet P. The influence of dairy products on plasma uric acid in women. *Eur J Epidemiol* 1995;11(3):275-81.
106. Bahr M, Fechner A, Kiehntopf M, Jahreis G. Consuming a mixed diet enriched with lupin protein beneficially affects plasma lipids in hypercholesterolemic subjects: a randomized controlled trial. *Clin Nutr* 2015;34(1):7-14. doi: 10.1016/j.clnu.2014.03.008.
107. Bird AR, Vuaran MS, King RA, Noakes M, Keogh J, Morell MK, Topping DL. Wholegrain foods made from a novel high-amylose barley variety (Himalaya 292) improve indices of bowel health in human subjects. *Br J Nutr* 2008;99(5):1032-40. doi: 10.1017/s000711450783902x.
108. Blesso CN, Andersen CJ, Barona J, Volk B, Volek JS, Fernandez ML. Effects of carbohydrate restriction and dietary cholesterol provided by eggs on clinical risk factors in metabolic syndrome. *J Clin Lipidol* 2013;7(5):463-71. doi: 10.1016/j.jacl.2013.03.008.
109. Blesso CN, Andersen CJ, Bolling BW, Fernandez ML. Egg intake improves carotenoid status by increasing plasma HDL cholesterol in adults with metabolic syndrome. *Food Funct* 2013;4(2):213-21. doi: 10.1039/c2fo30154g.
110. Brennan AM, Sweeney LL, Liu X, Mantzoros CS. Walnut consumption increases satiation but has no effect on insulin resistance or the metabolic profile over a 4-day period. *Obesity (Silver Spring, Md)* 2010;18(6):1176-82. doi: 10.1038/oby.2009.409.
111. Knopp RH, Retzlaff B, Fish B, Walden C, Wallick S, Anderson M, Aikawa K, Kahn SE. Effects of insulin resistance and obesity on lipoproteins and sensitivity to egg feeding. *Arteriosclerosis, thrombosis, and vascular biology* 2003;23(8):1437-43. doi: 10.1161/01.atv.0000082461.77557.c7.
112. Campos V, Despland C, Brandejsky V, Kreis R, Schneiter P, Chiolero A, Boesch C, Tappy L. Sugar- and artificially sweetened beverages and intrahepatic fat: A randomized controlled trial. *Obesity (Silver Spring, Md)* 2015;23(12):2335-9. doi: 10.1002/oby.21310.
113. Casas-Agustench P, Lopez-Uriarte P, Bullo M, Ros E, Cabre-Vila JJ, Salas-Salvado J. Effects of one serving of mixed nuts on serum lipids, insulin resistance and inflammatory markers in patients with the metabolic syndrome. *Nutr Metab Cardiovasc Dis* 2011;21(2):126-35. doi: 10.1016/j.numecd.2009.08.005.
114. Cha YS, Park Y, Lee M, Chae SW, Park K, Kim Y, Lee HS. Doenjang, a Korean fermented soy food, exerts antiobesity and antioxidative activities in overweight subjects with the PPAR-gamma2 C1431T polymorphism: 12-week, double-blind randomized clinical trial. *J Med Food* 2014;17(1):119-27. doi: 10.1089/jmf.2013.2877.

115. Hill AM, Harris Jackson KA, Roussell MA, West SG, Kris-Etherton PM. Type and amount of dietary protein in the treatment of metabolic syndrome: a randomized controlled trial. *Am J Clin Nutr* 2015;102(4):757-70. doi: 10.3945/ajcn.114.104026.
116. Chen G, Heilbrun LK, Venkatramanamoorthy R, Maranci V, Redd JN, Klurfeld DM, Djuric Z. Effects of low-fat and/or high-fruit-and-vegetable diets on plasma levels of 8-isoprostane-F2alpha in the Nutrition and Breast Health study. *Nutr Cancer* 2004;50(2):155-60. doi: 10.1207/s15327914nc5002\_4.
117. Colpo E, Dalton DAVC, Reetz LG, Duarte MM, Farias IL, Meinerz DF, Mariano DO, Vendrusculo RG, Boligon AA, Dalla Corte CL, et al. Brazilian nut consumption by healthy volunteers improves inflammatory parameters. *Nutrition (Burbank, Los Angeles County, Calif)* 2014;30(4):459-65. doi: 10.1016/j.nut.2013.10.005.
118. Jenkins DJ, Kendall CW, Mehling CC, Parker T, Rao AV, Agarwal S, Novokmet R, Jones PJ, Raeini M, Story JA, et al. Combined effect of vegetable protein (soy) and soluble fiber added to a standard cholesterol-lowering diet. *Metabolism* 1999;48(6):809-16.
119. Daniels JA, Mulligan C, McCance D, Woodside JV, Patterson C, Young IS, McEneny J. A randomised controlled trial of increasing fruit and vegetable intake and how this influences the carotenoid concentration and activities of PON-1 and LCAT in HDL from subjects with type 2 diabetes. *Cardiovascular diabetology* 2014;13:16. doi: 10.1186/1475-2840-13-16.
120. Davidi A, Reynolds J, Njike VY, Ma Y, Doughty K, Katz DL. The effect of the addition of daily fruit and nut bars to diet on weight, and cardiac risk profile, in overweight adults. *Journal of human nutrition and dietetics : the official journal of the British Dietetic Association* 2011;24(6):543-51. doi: 10.1111/j.1365-277X.2011.01201.x.
121. de Mello VD, Erkkila AT, Schwab US, Pulkkinen L, Kolehmainen M, Atalay M, Mussalo H, Lankinen M, Oresic M, Lehto S, et al. The effect of fatty or lean fish intake on inflammatory gene expression in peripheral blood mononuclear cells of patients with coronary heart disease. *Eur J Nutr* 2009;48(8):447-55. doi: 10.1007/s00394-009-0033-y.
122. Dhillon J, Tan SY, Mattes RD. Almond Consumption during Energy Restriction Lowers Truncal Fat and Blood Pressure in Compliant Overweight or Obese Adults. *J Nutr* 2016;146(12):2513-9. doi: 10.3945/jn.116.238444.
123. Djuric Z, Ren J, Mekhovich O, Venkatramanamoorthy R, Heilbrun LK. Effects of high fruit-vegetable and/or low-fat intervention on plasma micronutrient levels. *J Am Coll Nutr* 2006;25(3):178-87.
124. Drouin-Chartier JP, Gagnon J, Labonte ME, Desroches S, Charest A, Grenier G, Dodin S, Lemieux S, Couture P, Lamarche B. Impact of milk consumption on

- cardiometabolic risk in postmenopausal women with abdominal obesity. *Nutr J* 2015;14:12. doi: 10.1186/1475-2891-14-12.
125. Dugan CE, Aguilar D, Park YK, Lee JY, Fernandez ML. Dairy Consumption Lowers Systemic Inflammation and Liver Enzymes in Typically Low-Dairy Consumers with Clinical Characteristics of Metabolic Syndrome. *J Am Coll Nutr* 2016;35(3):255-61. doi: 10.1080/07315724.2015.1022637.
126. Durazzo A, Carcea M, Adlercreutz H, Azzini E, Polito A, Olivieri L, Zaccaria M, Meneghini C, Maiani F, Bausano G, et al. Effects of consumption of whole grain foods rich in lignans in healthy postmenopausal women with moderate serum cholesterol: a pilot study. *Int J Food Sci Nutr* 2014;65(5):637-45. doi: 10.3109/09637486.2014.893283.
127. Ebrahimi-Mamaghani M, Saghafi-Asl M, Pirouzpanah S, Asghari-Jafarabadi M. Effects of raw red onion consumption on metabolic features in overweight or obese women with polycystic ovary syndrome: a randomized controlled clinical trial. *The journal of obstetrics and gynaecology research* 2014;40(4):1067-76. doi: 10.1111/jog.12311.
128. Gross JL, Zelmanovitz T, Moulin CC, De Mello V, Perassolo M, Leitao C, Hoefel A, Paggi A, Azevedo MJ. Effect of a chicken-based diet on renal function and lipid profile in patients with type 2 diabetes: a randomized crossover trial. *Diabetes Care* 2002;25(4):645-51.
129. Noakes M, Clifton PM, Nestel PJ, Le Leu R, McIntosh G. Effect of high-amylose starch and oat bran on metabolic variables and bowel function in subjects with hypertriglyceridemia. *Am J Clin Nutr* 1996;64(6):944-51.
130. Wofford MR, Rebholz CM, Reynolds K, Chen J, Chen CS, Myers L, Xu J, Jones DW, Whelton PK, He J. Effect of soy and milk protein supplementation on serum lipid levels: a randomized controlled trial. *Eur J Clin Nutr* 2012;66(4):419-25. doi: 10.1038/ejcn.2011.168.
131. Mercanligil SM, Arslan P, Alasalvar C, Okut E, Akgul E, Pinar A, Geyik PO, Tokgozoglu L, Shahidi F. Effects of hazelnut-enriched diet on plasma cholesterol and lipoprotein profiles in hypercholesterolemic adult men. *Eur J Clin Nutr* 2007;61(2):212-20. doi: 10.1038/sj.ejcn.1602518.
132. Mukuddem-Petersen J, Stonehouse Oosthuizen W, Jerling JC, Hanekom SM, White Z. Effects of a high walnut and high cashew nut diet on selected markers of the metabolic syndrome: a controlled feeding trial. *Br J Nutr* 2007;97(6):1144-53. doi: 10.1017/s0007114507682944.
133. Pearce KL, Clifton PM, Noakes M. Egg consumption as part of an energy-restricted high-protein diet improves blood lipid and blood glucose profiles in individuals with type 2 diabetes. *Br J Nutr* 2011;105(4):584-92. doi: 10.1017/s0007114510003983.

134. Errazuriz I, Dube S, Slama M, Visentin R, Nayar S, O'Connor H, Cobelli C, Das SK, Basu A, Kremers WK, et al. Randomized Controlled Trial of a MUFA or Fiber-Rich Diet on Hepatic Fat in Prediabetes. *The Journal of clinical endocrinology and metabolism* 2017;102(5):1765-74. doi: 10.1210/jc.2016-3722.
135. Dunstan DW, Mori TA, Puddey IB, Beilin LJ, Burke V, Morton AR, Stanton KG. A randomised, controlled study of the effects of aerobic exercise and dietary fish on coagulation and fibrinolytic factors in type 2 diabetics. *Thrombosis and haemostasis* 1999;81(3):367-72.
136. Fuller NR, Caterson ID, Sainsbury A, Denyer G, Fong M, Gerofi J, Baqleh K, Williams KH, Lau NS, Markovic TP. The effect of a high-egg diet on cardiovascular risk factors in people with type 2 diabetes: the Diabetes and Egg (DIABEGG) study-a 3-mo randomized controlled trial. *Am J Clin Nutr* 2015;101(4):705-13. doi: 10.3945/ajcn.114.096925.
137. Gardner CD, Coulston A, Chatterjee L, Rigby A, Spiller G, Farquhar JW. The effect of a plant-based diet on plasma lipids in hypercholesterolemic adults: a randomized trial. *Ann Intern Med* 2005;142(9):725-33.
138. Gilbert JA, Joannisse DR, Chaput JP, Miegueu P, Cianflone K, Almeras N, Tremblay A. Milk supplementation facilitates appetite control in obese women during weight loss: a randomised, single-blind, placebo-controlled trial. *Br J Nutr* 2011;105(1):133-43. doi: 10.1017/s0007114510003119.
139. Gulati S, Misra A, Pandey RM, Bhatt SP, Saluja S. Effects of pistachio nuts on body composition, metabolic, inflammatory and oxidative stress parameters in Asian Indians with metabolic syndrome: a 24-wk, randomized control trial. *Nutrition (Burbank, Los Angeles County, Calif)* 2014;30(2):192-7. doi: 10.1016/j.nut.2013.08.005.
140. Harder H, Tetens I, Let MB, Meyer AS. Rye bran bread intake elevates urinary excretion of ferulic acid in humans, but does not affect the susceptibility of LDL to oxidation ex vivo. *Eur J Nutr* 2004;43(4):230-6. doi: 10.1007/s00394-004-0463-5.
141. Hartman TJ, Albert PS, Zhang Z, Bagshaw D, Kris-Etherton PM, Ulbrecht J, Miller CK, Bobe G, Colburn NH, Lanza E. Consumption of a legume-enriched, low-glycemic index diet is associated with biomarkers of insulin resistance and inflammation among men at risk for colorectal cancer. *J Nutr* 2010;140(1):60-7. doi: 10.3945/jn.109.114249.
142. Hernandez-Alonso P, Salas-Salvado J, Baldrich-Mora M, Juanola-Falgarona M, Bullo M. Beneficial effect of pistachio consumption on glucose metabolism, insulin resistance, inflammation, and related metabolic risk markers: a randomized clinical trial. *Diabetes Care* 2014;37(11):3098-105. doi: 10.2337/dc14-1431.
143. Hunninghake DB, Maki KC, Kwiterovich PO, Jr., Davidson MH, Dicklin MR, Kafonek SD. Incorporation of lean red meat into a National Cholesterol Education

- Program Step I diet: a long-term, randomized clinical trial in free-living persons with hypercholesterolemia. *J Am Coll Nutr* 2000;19(3):351-60.
144. Geelen A, Brouwer IA, Schouten EG, Kluft C, Katan MB, Zock PL. Intake of n-3 fatty acids from fish does not lower serum concentrations of C-reactive protein in healthy subjects. *Eur J Clin Nutr* 2004;58(10):1440-2. doi: 10.1038/sj.ejcn.1601986.
  145. Welty FK, Lee KS, Lew NS, Zhou JR. Effect of soy nuts on blood pressure and lipid levels in hypertensive, prehypertensive, and normotensive postmenopausal women. *Arch Intern Med* 2007;167(10):1060-7. doi: 10.1001/archinte.167.10.1060.
  146. Duane WC. Effects of legume consumption on serum cholesterol, biliary lipids, and sterol metabolism in humans. *Journal of lipid research* 1997;38(6):1120-8.
  147. Hilpert KF, Kris-Etherton PM, West SG. Lipid response to a low-fat diet with or without soy is modified by C-reactive protein status in moderately hypercholesterolemic adults. *J Nutr* 2005;135(5):1075-9.
  148. Finley JW, Burrell JB, Reeves PG. Pinto bean consumption changes SCFA profiles in fecal fermentations, bacterial populations of the lower bowel, and lipid profiles in blood of humans. *J Nutr* 2007;137(11):2391-8.
  149. Goodrow EF, Wilson TA, Houde SC, Vishwanathan R, Scollin PA, Handelman G, Nicolosi RJ. Consumption of one egg per day increases serum lutein and zeaxanthin concentrations in older adults without altering serum lipid and lipoprotein cholesterol concentrations. *J Nutr* 2006;136(10):2519-24.
  150. Griel AE, Cao Y, Bagshaw DD, Cifelli AM, Holub B, Kris-Etherton PM. A macadamia nut-rich diet reduces total and LDL-cholesterol in mildly hypercholesterolemic men and women. *J Nutr* 2008;138(4):761-7.
  151. Mutungi G, Ratliff J, Puglisi M, Torres-Gonzalez M, Vaishnav U, Leite JO, Quann E, Volek JS, Fernandez ML. Dietary cholesterol from eggs increases plasma HDL cholesterol in overweight men consuming a carbohydrate-restricted diet. *J Nutr* 2008;138(2):272-6.
  152. Tey SL, Gray AR, Chisholm AW, Delahunty CM, Brown RC. The dose of hazelnuts influences acceptance and diet quality but not inflammatory markers and body composition in overweight and obese individuals. *J Nutr* 2013;143(8):1254-62. doi: 10.3945/jn.113.174714.
  153. Labonte ME, Cyr A, Abdullah MM, Lepine MC, Vohl MC, Jones P, Couture P, Lamarche B. Dairy product consumption has no impact on biomarkers of inflammation among men and women with low-grade systemic inflammation. *J Nutr* 2014;144(11):1760-7. doi: 10.3945/jn.114.200576.

154. McEvoy CT, Wallace IR, Hamill LL, Hunter SJ, Neville CE, Patterson CC, Woodside JV, Young IS, McKinley MC. Increasing Fruit and Vegetable Intake Has No Dose-Response Effect on Conventional Cardiovascular Risk Factors in Overweight Adults at High Risk of Developing Cardiovascular Disease. *J Nutr* 2015;145(7):1464-71. doi: 10.3945/jn.115.213090.
155. Jarvi A, Karlstrom B, Vessby B, Becker W. Increased intake of fruits and vegetables in overweight subjects: effects on body weight, body composition, metabolic risk factors and dietary intake. *Br J Nutr* 2016;115(10):1760-8. doi: 10.1017/s0007114516000970.
156. Jung SJ, Park SH, Choi EK, Cha YS, Cho BH, Kim YG, Kim MG, Song WO, Park TS, Ko JK, et al. Beneficial effects of Korean traditional diets in hypertensive and type 2 diabetic patients. *J Med Food* 2014;17(1):161-71. doi: 10.1089/jmf.2013.3042.
157. Jones KW, Eller LK, Parnell JA, Doyle-Baker PK, Edwards AL, Reimer RA. Effect of a dairy- and calcium-rich diet on weight loss and appetite during energy restriction in overweight and obese adults: a randomized trial. *Eur J Clin Nutr* 2013;67(4):371-6. doi: 10.1038/ejcn.2013.52.
158. Magnúsdóttir OK, Landberg R, Gunnarsdóttir I, Cloetens L, Akesson B, Rosqvist F, Schwab U, Herzig KH, Hukkanen J, Savolainen MJ, et al. Whole grain rye intake, reflected by a biomarker, is associated with favorable blood lipid outcomes in subjects with the metabolic syndrome--a randomized study. *PLoS One* 2014;9(10):e110827. doi: 10.1371/journal.pone.0110827.
159. Lee YM, Kim SA, Lee IK, Kim JG, Park KG, Jeong JY, Jeon JH, Shin JY, Lee DH. Effect of a Brown Rice Based Vegan Diet and Conventional Diabetic Diet on Glycemic Control of Patients with Type 2 Diabetes: A 12-Week Randomized Clinical Trial. *PLoS One* 2016;11(6):e0155918. doi: 10.1371/journal.pone.0155918.
160. West SG, Hilpert KF, Juturu V, Bordi PL, Lampe JW, Mousa SA, Kris-Etherton PM. Effects of including soy protein in a blood cholesterol-lowering diet on markers of cardiac risk in men and in postmenopausal women with and without hormone replacement therapy. *Journal of women's health (2002)* 2005;14(3):253-62. doi: 10.1089/jwh.2005.14.253.
161. Kasliwal RR, Bansal M, Mehrotra R, Yeptho KP, Trehan N. Effect of pistachio nut consumption on endothelial function and arterial stiffness. *Nutrition (Burbank, Los Angeles County, Calif)* 2015;31(5):678-85. doi: 10.1016/j.nut.2014.10.019.
162. Kim JY, Kim JH, Lee DH, Kim SH, Lee SS. Meal replacement with mixed rice is more effective than white rice in weight control, while improving antioxidant enzyme activity in obese women. *Nutrition research (New York, NY)* 2008;28(2):66-71. doi: 10.1016/j.nutres.2007.12.006.
163. Kim Y, Keogh JB, Clifton PM. Consumption of red and processed meat and refined grains for 4weeks decreases insulin sensitivity in insulin-resistant adults: A

- randomized crossover study. *Metabolism* 2017;68:173-83. doi: 10.1016/j.metabol.2016.12.011.
164. Kwak JH, Paik JK, Kim HI, Kim OY, Shin DY, Kim HJ, Lee JH, Lee JH. Dietary treatment with rice containing resistant starch improves markers of endothelial function with reduction of postprandial blood glucose and oxidative stress in patients with prediabetes or newly diagnosed type 2 diabetes. *Atherosclerosis* 2012;224(2):457-64. doi: 10.1016/j.atherosclerosis.2012.08.003.
165. Lacaille B, Julien P, Deshaies Y, Lavigne C, Brun LD, Jacques H. Responses of plasma lipoproteins and sex hormones to the consumption of lean fish incorporated in a prudent-type diet in normolipidemic men. *J Am Coll Nutr* 2000;19(6):745-53.
166. Lee YJ, Nam GE, Seo JA, Yoon T, Seo I, Lee JH, Im D, Bahn KN, Jeong SA, Kang TS, et al. Nut consumption has favorable effects on lipid profiles of Korean women with metabolic syndrome. *Nutrition research (New York, NY)* 2014;34(9):814-20. doi: 10.1016/j.nutres.2014.08.011.
167. Li SC, Liu YH, Liu JF, Chang WH, Chen CM, Chen CY. Almond consumption improved glycemic control and lipid profiles in patients with type 2 diabetes mellitus. *Metabolism* 2011;60(4):474-9. doi: 10.1016/j.metabol.2010.04.009.
168. Lowndes J, Sinnott SS, Rippe JM. No Effect of Added Sugar Consumed at Median American Intake Level on Glucose Tolerance or Insulin Resistance. *Nutrients* 2015;7(10):8830-45. doi: 10.3390/nu7105430.
169. de Simone G, Chinali M, Mureddu GF, Cacciatore G, Lucci D, Latini R, Masson S, Vanasia M, Maggioni AP, Boccanelli A. Effect of canrenone on left ventricular mechanics in patients with mild systolic heart failure and metabolic syndrome: the AREA-in-CHF study. *Nutr Metab Cardiovasc Dis* 2011;21(10):783-91. doi: 10.1016/j.numecd.2010.02.012.
170. Lukaczer D, Liska DJ, Lerman RH, Darland G, Schiltz B, Tripp M, Bland JS. Effect of a low glycemic index diet with soy protein and phytosterols on CVD risk factors in postmenopausal women. *Nutrition (Burbank, Los Angeles County, Calif)* 2006;22(2):104-13. doi: 10.1016/j.nut.2005.05.007.
171. Ma Y, Njike VY, Millet J, Dutta S, Doughty K, Treu JA, Katz DL. Effects of walnut consumption on endothelial function in type 2 diabetic subjects: a randomized controlled crossover trial. *Diabetes Care* 2010;33(2):227-32. doi: 10.2337/dc09-1156.
172. Mah E, Schulz JA, Kaden VN, Lawless AL, Rotor J, Mantilla LB, Liska DJ. Cashew consumption reduces total and LDL cholesterol: a randomized, crossover, controlled-feeding trial. *Am J Clin Nutr* 2017;105(5):1070-8. doi: 10.3945/ajcn.116.150037.
173. Maki KC, Butteiger DN, Rains TM, Lawless A, Reeves MS, Schasteen C, Krul ES. Effects of soy protein on lipoprotein lipids and fecal bile acid excretion in men and



- women with moderate hypercholesterolemia. *J Clin Lipidol* 2010;4(6):531-42. doi: 10.1016/j.jacl.2010.09.001.
174. McGeoch SC, Johnstone AM, Lobley GE, Adamson J, Hickson K, Holtrop G, Fyfe C, Clark LF, Pearson DW, Abraham P, et al. A randomized crossover study to assess the effect of an oat-rich diet on glycaemic control, plasma lipids and postprandial glycaemia, inflammation and oxidative stress in Type 2 diabetes. *Diabetic medicine : a journal of the British Diabetic Association* 2013;30(11):1314-23. doi: 10.1111/dme.12228.
175. McKiernan F, Lokko P, Kuevi A, Sales RL, Costa NM, Bressan J, Alfenas RC, Mattes RD. Effects of peanut processing on body weight and fasting plasma lipids. *Br J Nutr* 2010;104(3):418-26. doi: 10.1017/s0007114510000590.
176. Melanson KJ, Angelopoulos TJ, Nguyen VT, Martini M, Zukley L, Lowndes J, Dube TJ, Fiutem JJ, Yount BW, Rippe JM. Consumption of whole-grain cereals during weight loss: effects on dietary quality, dietary fiber, magnesium, vitamin B-6, and obesity. *J Am Diet Assoc* 2006;106(9):1380-8; quiz 9-90. doi: 10.1016/j.jada.2006.06.003.
177. Mutungi G, Waters D, Ratliff J, Puglisi M, Clark RM, Volek JS, Fernandez ML. Eggs distinctly modulate plasma carotenoid and lipoprotein subclasses in adult men following a carbohydrate-restricted diet. *The Journal of nutritional biochemistry* 2010;21(4):261-7. doi: 10.1016/j.jnutbio.2008.12.011.
178. Sabate J, Fraser GE, Burke K, Knutsen SF, Bennett H, Lindsted KD. Effects of walnuts on serum lipid levels and blood pressure in normal men. *N Engl J Med* 1993;328(9):603-7. doi: 10.1056/nejm199303043280902.
179. Chandalia M, Garg A, Lutjohann D, von Bergmann K, Grundy SM, Brinkley LJ. Beneficial effects of high dietary fiber intake in patients with type 2 diabetes mellitus. *N Engl J Med* 2000;342(19):1392-8. doi: 10.1056/nejm200005113421903.
180. Gilhooly CH, Das SK, Golden JK, McCrory MA, Rochon J, DeLany JP, Freed AM, Fuss PJ, Dallal GE, Saltzman E, et al. Use of cereal fiber to facilitate adherence to a human caloric restriction program. *Aging clinical and experimental research* 2008;20(6):513-20.
181. Rebholz CM, Reynolds K, Wofford MR, Chen J, Kelly TN, Mei H, Whelton PK, He J. Effect of soybean protein on novel cardiovascular disease risk factors: a randomized controlled trial. *Eur J Clin Nutr* 2013;67(1):58-63. doi: 10.1038/ejcn.2012.186.
182. Rueda JM, Khosla P. Impact of breakfasts (with or without eggs) on body weight regulation and blood lipids in university students over a 14-week semester. *Nutrients* 2013;5(12):5097-113. doi: 10.3390/nu5125097.
183. Whittaker A, Sofi F, Luisi ML, Rafanelli E, Fiorillo C, Becatti M, Abbate R, Casini A, Gensini GF, Benedettelli S. An organic khorasan wheat-based replacement diet

- improves risk profile of patients with acute coronary syndrome: a randomized crossover trial. *Nutrients* 2015;7(5):3401-15. doi: 10.3390/nu7053401.
184. Campos V, Despland C, Brandejsky V, Kreis R, Schneiter P, Boesch C, Tappy L. Metabolic Effects of Replacing Sugar-Sweetened Beverages with Artificially-Sweetened Beverages in Overweight Subjects with or without Hepatic Steatosis: A Randomized Control Clinical Trial. *Nutrients* 2017;9(3). doi: 10.3390/nu9030202.
185. Kim Y, Keogh JB, Clifton PM. Effects of Two Different Dietary Patterns on Inflammatory Markers, Advanced Glycation End Products and Lipids in Subjects without Type 2 Diabetes: A Randomised Crossover Study. *Nutrients* 2017;9(4). doi: 10.3390/nu9040336.
186. Beck EJ, Tapsell LC, Batterham MJ, Tosh SM, Huang XF. Oat beta-glucan supplementation does not enhance the effectiveness of an energy-restricted diet in overweight women. *Br J Nutr* 2010;103(8):1212-22. doi: 10.1017/s0007114509992856.
187. Palacios C, Bertran JJ, Rios RE, Soltero S. No effects of low and high consumption of dairy products and calcium supplements on body composition and serum lipids in Puerto Rican obese adults. *Nutrition (Burbank, Los Angeles County, Calif)* 2011;27(5):520-5. doi: 10.1016/j.nut.2010.02.011.
188. Shidfar F, Eshramphosh E, Heydari I, Haghghi L, Hosseini S, Shidfar S. Effects of soy bean on serum paraoxonase 1 activity and lipoproteins in hyperlipidemic postmenopausal women. *Int J Food Sci Nutr* 2009;60(3):195-205. doi: 10.1080/09637480701669463.
189. Pick ME, Hawrysh ZJ, Gee MI, Toth E, Garg ML, Hardin RT. Oat bran concentrate bread products improve long-term control of diabetes: a pilot study. *J Am Diet Assoc* 1996;96(12):1254-61. doi: 10.1016/s0002-8223(96)00329-x.
190. Ratliff J, Mutungi G, Puglisi MJ, Volek JS, Fernandez ML. Carbohydrate restriction (with or without additional dietary cholesterol provided by eggs) reduces insulin resistance and plasma leptin without modifying appetite hormones in adult men. *Nutrition research (New York, NY)* 2009;29(4):262-8. doi: 10.1016/j.nutres.2009.03.007.
191. Rave K, Roggen K, Dellweg S, Heise T, tom Dieck H. Improvement of insulin resistance after diet with a whole-grain based dietary product: results of a randomized, controlled cross-over study in obese subjects with elevated fasting blood glucose. *Br J Nutr* 2007;98(5):929-36. doi: 10.1017/s0007114507749267.
192. Parham M, Heidari S, Khorramirad A, Hozoori M, Hosseinzadeh F, Bakhtyari L, Vafaeimanesh J. Effects of pistachio nut supplementation on blood glucose in patients with type 2 diabetes: a randomized crossover trial. *The review of diabetic studies : RDS* 2014;11(2):190-6. doi: 10.1900/rds.2014.11.190.

193. Carvalho RF, Huguenin GV, Luiz RR, Moreira AS, Oliveira GM, Rosa G. Intake of partially defatted Brazil nut flour reduces serum cholesterol in hypercholesterolemic patients--a randomized controlled trial. *Nutr J* 2015;14:59. doi: 10.1186/s12937-015-0036-x.
194. Saraf-Bank S, Esmailzadeh A, Faghihimani E, Azadbakht L. Effect of non-soy legume consumption on inflammation and serum adiponectin levels among first-degree relatives of patients with diabetes: a randomized, crossover study. *Nutrition (Burbank, Los Angeles County, Calif)* 2015;31(3):459-65. doi: 10.1016/j.nut.2014.09.015.
195. Saraf-Bank S, Esmailzadeh A, Faghihimani E, Azadbakht L. Effects of Legume-Enriched Diet on Cardiometabolic Risk Factors among Individuals at Risk for Diabetes: A Crossover Study. *J Am Coll Nutr* 2016;35(1):31-40. doi: 10.1080/07315724.2014.931262.
196. Nadeem N, Woodside JV, Neville CE, McCall DO, McCance D, Edgar D, Young IS, McEneny J. Serum amyloid A-related inflammation is lowered by increased fruit and vegetable intake, while high-sensitive C-reactive protein, IL-6 and E-selectin remain unresponsive. *Br J Nutr* 2014;112(7):1129-36. doi: 10.1017/s0007114514001639.
197. Simao AN, Lozovoy MA, Dichi I. Effect of soy product kinako and fish oil on serum lipids and glucose metabolism in women with metabolic syndrome. *Nutrition (Burbank, Los Angeles County, Calif)* 2014;30(1):112-5. doi: 10.1016/j.nut.2013.05.024.
198. Spiller GA, Jenkins DA, Bosello O, Gates JE, Cragen LN, Bruce B. Nuts and plasma lipids: an almond-based diet lowers LDL-C while preserving HDL-C. *J Am Coll Nutr* 1998;17(3):285-90.
199. St-Onge MP, Claps N, Wolper C, Heymsfield SB. Supplementation with soy-protein-rich foods does not enhance weight loss. *J Am Diet Assoc* 2007;107(3):500-5. doi: 10.1016/j.jada.2006.12.002.
200. Tapsell LC, Gillen LJ, Patch CS, Batterham M, Owen A, Bare M, Kennedy M. Including walnuts in a low-fat/modified-fat diet improves HDL cholesterol-to-total cholesterol ratios in patients with type 2 diabetes. *Diabetes Care* 2004;27(12):2777-83.
201. Tapsell LC, Batterham MJ, Teuss G, Tan SY, Dalton S, Quick CJ, Gillen LJ, Charlton KE. Long-term effects of increased dietary polyunsaturated fat from walnuts on metabolic parameters in type II diabetes. *Eur J Clin Nutr* 2009;63(8):1008-15. doi: 10.1038/ejcn.2009.19.
202. Tapsell LC, Batterham MJ, Thorne RL, O'Shea JE, Grafenauer SJ, Probst YC. Weight loss effects from vegetable intake: a 12-month randomised controlled trial. *Eur J Clin Nutr* 2014;68(7):778-85. doi: 10.1038/ejcn.2014.39.

203. Chakrabarty G, Manjunatha S, Bijlani RL, Ray RB, Mahapatra SC, Mehta N, Lakshmy R, Vashisht S, Manchanda SC. The effect of ingestion of egg on the serum lipid profile of healthy young Indians. *Indian journal of physiology and pharmacology* 2004;48(3):286-92.
204. Thompson WG, Rostad Holdman N, Janzow DJ, Slezak JM, Morris KL, Zemel MB. Effect of energy-reduced diets high in dairy products and fiber on weight loss in obese adults. *Obesity research* 2005;13(8):1344-53. doi: 10.1038/oby.2005.163.
205. Thorp AA, Howe PR, Mori TA, Coates AM, Buckley JD, Hodgson J, Mansour J, Meyer BJ. Soy food consumption does not lower LDL cholesterol in either equol or nonequol producers. *Am J Clin Nutr* 2008;88(2):298-304.
206. van Nielen M, Feskens EJ, Rietman A, Siebelink E, Mensink M. Partly replacing meat protein with soy protein alters insulin resistance and blood lipids in postmenopausal women with abdominal obesity. *J Nutr* 2014;144(9):1423-9. doi: 10.3945/jn.114.193706.
207. Vanegas SM, Meydani M, Barnett JB, Goldin B, Kane A, Rasmussen H, Brown C, Vangay P, Knights D, Jonnalagadda S, et al. Substituting whole grains for refined grains in a 6-wk randomized trial has a modest effect on gut microbiota and immune and inflammatory markers of healthy adults. *Am J Clin Nutr* 2017;105(3):635-50. doi: 10.3945/ajcn.116.146928.
208. Vazquez C, Botella-Carretero JI, Corella D, Fiol M, Lage M, Lurbe E, Richart C, Fernandez-Real JM, Fuentes F, Ordonez A, et al. White fish reduces cardiovascular risk factors in patients with metabolic syndrome: the WISH-CARE study, a multicenter randomized clinical trial. *Nutr Metab Cardiovasc Dis* 2014;24(3):328-35. doi: 10.1016/j.numecd.2013.09.018.
209. Weickert MO, Roden M, Isken F, Hoffmann D, Nowotny P, Osterhoff M, Blaut M, Alpert C, Gogebakan O, Bumke-Vogt C, et al. Effects of supplemented isoenergetic diets differing in cereal fiber and protein content on insulin sensitivity in overweight humans. *Am J Clin Nutr* 2011;94(2):459-71. doi: 10.3945/ajcn.110.004374.
210. Whybrow S, Harrison CL, Mayer C, James Stubbs R. Effects of added fruits and vegetables on dietary intakes and body weight in Scottish adults. *Br J Nutr* 2006;95(3):496-503.
211. Wiebe SL, Bruce VM, McDonald BE. A comparison of the effect of diets containing beef protein and plant proteins on blood lipids of healthy young men. *Am J Clin Nutr* 1984;40(5):982-9.
212. Wien MA, Sabate JM, Ikle DN, Cole SE, Kandeel FR. Almonds vs complex carbohydrates in a weight reduction program. *International journal of obesity and related metabolic disorders : journal of the International Association for the Study of Obesity* 2003;27(11):1365-72. doi: 10.1038/sj.ijo.0802411.

213. Wien M, Bleich D, Raghuwanshi M, Gould-Forgerite S, Gomes J, Monahan-Couch L, Oda K. Almond consumption and cardiovascular risk factors in adults with prediabetes. *J Am Coll Nutr* 2010;29(3):189-97.
214. Wien M, Oda K, Sabate J. A randomized controlled trial to evaluate the effect of incorporating peanuts into an American Diabetes Association meal plan on the nutrient profile of the total diet and cardiometabolic parameters of adults with type 2 diabetes. *Nutr J* 2014;13:10. doi: 10.1186/1475-2891-13-10.
215. Zhang X, McGeoch SC, Megson IL, MacRury SM, Johnstone AM, Abraham P, Pearson DW, de Roos B, Holtrop G, O'Kennedy N, et al. Oat-enriched diet reduces inflammatory status assessed by circulating cell-derived microparticle concentrations in type 2 diabetes. *Molecular nutrition & food research* 2014;58(6):1322-32. doi: 10.1002/mnfr.201300820.
216. Pol K, Christensen R, Bartels EM, Raben A, Tetens I, Kristensen M. Whole grain and body weight changes in apparently healthy adults: a systematic review and meta-analysis of randomized controlled studies. *Am J Clin Nutr* 2013;98(4):872-84. doi: 10.3945/ajcn.113.064659.
217. Mohammadifard N, Salehi-Abargouei A, Salas-Salvado J, Guasch-Ferre M, Humphries K, Sarrafzadegan N. The effect of tree nut, peanut, and soy nut consumption on blood pressure: a systematic review and meta-analysis of randomized controlled clinical trials. *Am J Clin Nutr* 2015;101(5):966-82. doi: 10.3945/ajcn.114.091595.
218. Ye EQ, Chacko SA, Chou EL, Kugizaki M, Liu S. Greater whole-grain intake is associated with lower risk of type 2 diabetes, cardiovascular disease, and weight gain. *J Nutr* 2012;142(7):1304-13. doi: 10.3945/jn.111.155325.
219. Kaiser KA, Brown AW, Bohan Brown MM, Shikany JM, Mattes RD, Allison DB. Increased fruit and vegetable intake has no discernible effect on weight loss: a systematic review and meta-analysis. *Am J Clin Nutr* 2014;100(2):567-76. doi: 10.3945/ajcn.114.090548.
220. Mytton OT, Nnoaham K, Eyles H, Scarborough P, Ni Mhurchu C. Systematic review and meta-analysis of the effect of increased vegetable and fruit consumption on body weight and energy intake. *BMC Public Health* 2014;14:886. doi: 10.1186/1471-2458-14-886.
221. Keenan JM, Pins JJ, Frazel C, Moran A, Turnquist L. Oat ingestion reduces systolic and diastolic blood pressure in patients with mild or borderline hypertension: a pilot trial. *The Journal of family practice* 2002;51(4):369.
222. Jenkins DJ, Wong GS, Patten R, Bird J, Hall M, Buckley GC, McGuire V, Reichert R, Little JA. Leguminous seeds in the dietary management of hyperlipidemia. *Am J Clin Nutr* 1983;38(4):567-73.

223. Orem A, Yucesan FB, Orem C, Akcan B, Kural BV, Alasalvar C, Shahidi F. Hazelnut-enriched diet improves cardiovascular risk biomarkers beyond a lipid-lowering effect in hypercholesterolemic subjects. *J Clin Lipidol* 2013;7(2):123-31. doi: 10.1016/j.jacl.2012.10.005.
